# Supplementary material for: Synthesis of chiral β-hydroxy allylic sulfides via iridium-catalyzed asymmetric cascade allylation/acyl transfer rearrangement
Source: Royal Society of Chemistry journal article supplement (doi:10.1039/d5cc00422e), 2025-01-01
Supplement: d5cc00422e1.pdf [file d5cc00422e1.pdf]

*Supporting Information*

**Synthesis of Chiral  $\beta$ -Hydroxy Allylic Sulfides *via* Iridium-Catalyzed  
Asymmetric Cascade Allylation/Acyl Transfer Rearrangement**

Jun Wei,<sup>a</sup> Zhi-Yuan Yi,<sup>a</sup> Zhuan Jin,<sup>a</sup> Yi Liu,<sup>a</sup> Zuo-Fei Wang,<sup>a</sup> Xiu-Qin Dong,<sup>\*a</sup> Chun-Jiang Wang<sup>\*a,b</sup>

<sup>a</sup> Hubei Research Center of Fundamental Science-Chemistry, Engineering Research Center of Organosilicon Compounds & Materials, Ministry of Education, College of Chemistry and Molecular Sciences, Wuhan University, Wuhan, 430072, China

<sup>b</sup> State Key Laboratory of Organometallic Chemistry, Shanghai Institute of Organic Chemistry, Shanghai, 230021, China

E-mail: xiuqindong@whu.edu.cn (X.-Q.D.); cjwang@whu.edu.cn (C.-J.W.)

**Table of Contents**

|                                                                                                |     |
|------------------------------------------------------------------------------------------------|-----|
| 1. General Remarks.....                                                                        | S2  |
| 2. Preparation of aryl thioesters.....                                                         | S2  |
| 3. General procedure for asymmetric synthesis of chiral $\beta$ -hydroxy allylic sulfides..... | S4  |
| 4. Spectral characterization data for the products.....                                        | S5  |
| 5. Synthetic transformation.....                                                               | S27 |
| 6. Control experiments and mechanistic investigations.....                                     | S30 |
| 7. X-ray structure of <i>ent</i> - <b>5</b> .....                                              | S36 |
| 8. Reference.....                                                                              | S37 |
| 9. NMR spectra.....                                                                            | S39 |

## 1. General remarks

$^1\text{H}$  NMR spectra were recorded on a Bruker 400 MHz spectrometer in  $\text{CDCl}_3$ . Chemical shifts are reported in ppm with the internal TMS signal at 0.0 ppm as a standard. The data are reported as (s = single, d = double, t = triple, q = quarte, m = multiple or unresolved, br s = broad single, coupling constant(s) in Hz, integration).  $^{13}\text{C}$  NMR spectra were recorded on a Bruker 101 MHz spectrometer in  $\text{CDCl}_3$ . Chemical shifts are reported in ppm with the internal chloroform signal at 77.0 ppm as a standard.  $^{19}\text{F}$  NMR spectra were recorded on a Bruker 376 MHz spectrometer in  $\text{CDCl}_3$ . Chemical shifts are reported in ppm with the internal  $\text{CF}_3\text{COOH}$  signal at -76.55 ppm. High resolution mass spectra (HR-MS) were recorded on a LTQ-Orbitrap Elite mass spectrometer with  $\text{CH}_3\text{CN}/\text{MeOH}$  as solvent mixture for the measurements. Commercially obtained reagents were used without further purification. Solvents were purified prior to use according to the standard methods. Unless otherwise noted, all reactions were carried out under nitrogen atmosphere. Enantiomeric excess was determined by chiral-phase HPLC analysis in comparison with authentic racemic materials. Optical rotations were measured on a Rudolph Research Analytical Autopol VI polarimeter with  $[\alpha]_{\text{D}}$  values reported in degrees; concentration ( $c$ ) is in g/100 mL. Substrates (**1a**, **1f**, **1j**, **1n**, **1p**, **1y**, **1z**),<sup>1</sup> (**1b**, **1d**, **1i**),<sup>2</sup> **1c**,<sup>3</sup> (**1e**, **1g**, **1m**),<sup>4</sup> **1h**,<sup>5</sup> (**1k**, **1l**),<sup>6</sup> **1o**,<sup>7</sup> **1q**,<sup>8</sup> (**1r**, **1C**),<sup>9</sup> **1s**,<sup>10</sup> (**1t**, **1v**, **1x**)<sup>11</sup>, **1u**<sup>12</sup> were prepared according to the literature procedure. Chiral ligands,<sup>13,14</sup> **dbcot**,<sup>15</sup> and **[Ir\*]-1-4** complexes<sup>16,17</sup> were prepared according to the literature procedure. X-ray diffraction was measured on XtaLAB PRO MM007HF Cu. The absolute configuration of *ent*-**5** was determined by X-ray analysis, and those of other adducts were deduced based on this result.

## 2. Preparation of aryl thioesters

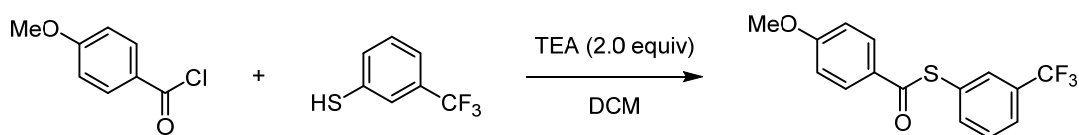

To a round-bottomed flask with 3-(trifluoromethyl) thiophenol (1.0 equiv., 5 mmol), were added TEA (2.0 equiv.) and DCM (30 mL), the reaction was cooled to 0 °C, then the 4-methoxybenzoyl chloride was added slowly. Allow the reaction to proceed at room temperature overnight. When the

starting material was consumed, the reaction was quenched with sat. aq. NaHCO<sub>3</sub> and extracted three times with DCM. The combined organic layer was washed with brine, dried over Na<sub>2</sub>SO<sub>4</sub>, and then filtered. The filtrate was concentrated in vacuo and the residue was purified by column chromatography.

**S-(3-(trifluoromethyl)phenyl) 4-methoxybenzothioate (1w):** yield (70%); white solid, m.p. 65°C.

**<sup>1</sup>H NMR (400 MHz, CDCl<sub>3</sub>)** δ 8.04 – 7.96 (m, 2H), 7.78 (s, 1H), 7.74 – 7.66 (m, 2H), 7.58 (t, *J* = 7.8 Hz, 1H), 7.02 – 6.94 (m, 2H), 3.90 (s, 3H).

**<sup>13</sup>C NMR (101 MHz, CDCl<sub>3</sub>)** δ 187.4, 164.3, 138.5, δ 131.8 (q, *J* = 3.8 Hz), 131.6 (q, *J* = 30.3 Hz), 131.4, 129.8, 129.5, 129.1, 128.9, 126.4 (q, *J* = 272.7 Hz), 126.1 (q, *J* = 3.8 Hz), 114.0, 55.6.

**<sup>19</sup>F NMR (377 MHz, CDCl<sub>3</sub>)** δ -62.7.

**HRMS (ESI+)** Calcd. For C<sub>15</sub>H<sub>13</sub>F<sub>3</sub>O<sub>2</sub>S<sup>+</sup> ([M+H]<sup>+</sup>): 313.0505, found: 313.0504.

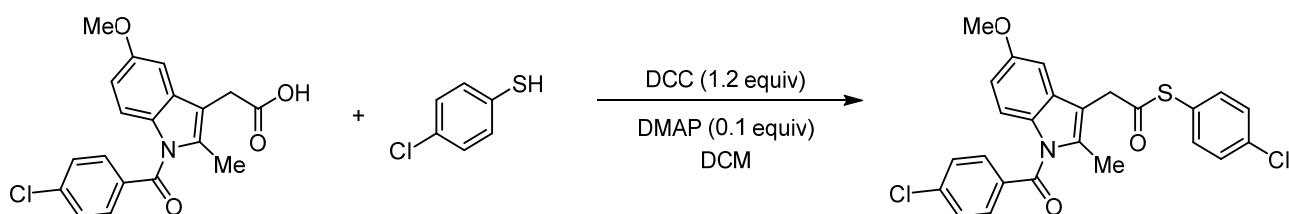

To a mixture of Indocin (1.0 equiv., 5 mmol), 4-chlorobenzenethiol (1.1 equiv., 5.5 mmol), dicyclohexylcarbodiimide (DCC, 1.2 equiv., 6.0 mmol), and 4-dimethylaminopyridine (DMAP, 0.1 equiv., 0.5 mmol) into the flask, then dissolve with 10 mL dichloromethane (DCM), and stir the mixture at room temperature. Consumed alcohol completely determined by TLC analysis, then filter off the insoluble white solid on diatomaceous earth, wash the filter cake twice with DCM, concentrate the filtrate, the residue was purified by column chromatography on silica gel.

**S-(4-chlorophenyl) 2-(1-(4-chlorobenzoyl)-5-methoxy-2-methyl-1H-indol-3-yl)ethanethioate (1A):** yield (55%); white solid, m.p. 135°C.

**<sup>1</sup>H NMR (400 MHz, CDCl<sub>3</sub>)** δ 7.72 – 7.64 (m, 2H), 7.52 – 7.44 (m, 2H), 7.40 – 7.34 (m, 2H), 7.32 – 7.27 (m, 2H), 6.98 (d, *J* = 2.5 Hz, 1H), 6.90 (d, *J* = 9.0 Hz, 1H), 6.71 (dd, *J* = 9.0, 2.5 Hz, 1H), 3.96 (s, 2H), 3.85 (s, 3H), 2.45 (s, 3H).

**<sup>13</sup>C NMR (101 MHz, CDCl<sub>3</sub>)** δ 194.7, 168.3, 156.2, 139.5, 137.0, 135.9, 135.6, 133.7, 131.2, 130.9, 130.4, 129.4, 129.2, 126.1, 115.0, 111.9, 111.5, 101.1, 55.7, 39.1, 13.5.

**HRMS (ESI+)** Calcd. For C<sub>25</sub>H<sub>19</sub>NC<sub>2</sub>O<sub>3</sub>SN<sup>+</sup> ([M+Na]<sup>+</sup>): 506.0355, found: 506.0353.

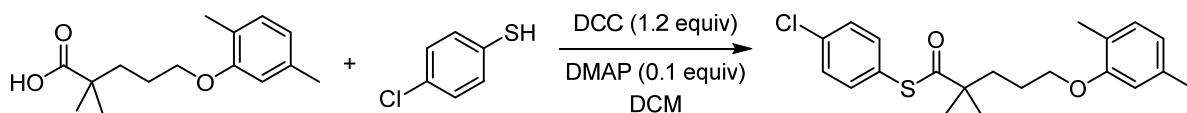

To a mixture of Gemfibrozil (1.0 equiv., 5 mmol), 4-chlorobenzenethiol (1.1 equiv., 5.5 mmol), dicyclohexylcarbodiimide (DCC, 1.2 equiv., 6.0 mmol), and 4-dimethylaminopyridine (DMAP, 0.1 equiv., 0.5 mmol) into the flask, then dissolve with 10 mL dichloromethane (DCM), and stir the mixture at room temperature. Consumed alcohol completely determined by TLC analysis, then filter off the insoluble white solid on diatomaceous earth, wash the filter cake twice with DCM, concentrate the filtrate, the residue was purified by column chromatography on silica gel.

**S-(4-chlorophenyl) 5-(2,5-dimethylphenoxy)-2,2-dimethylpentanethioate (1B):** yield (70%); colorless oil.

**<sup>1</sup>H NMR (400 MHz, CDCl<sub>3</sub>)** δ 7.42 – 7.34 (m, 2H), 7.32 – 7.27 (m, 2H), 7.03 (d, *J* = 7.4 Hz, 1H), 6.69 (dd, *J* = 7.5, 1.6 Hz, 1H), 6.63 (d, *J* = 1.7 Hz, 1H), 3.97 (t, *J* = 5.7 Hz, 2H), 2.33 (s, 3H), 2.22 (s, 3H), 1.95 – 1.76 (m, 4H), 1.36 (s, 6H).

**<sup>13</sup>C NMR (101 MHz, CDCl<sub>3</sub>)** δ 203.6, 156.8, 136.4, 136.2, 135.5, 130.3, 129.3, 126.4, 123.6, 120.7, 111.9, 67.6, 50.1, 37.6, 25.3, 24.9, 21.4, 15.8.

**HRMS (ESI<sup>+</sup>)** Calcd. For C<sub>21</sub>H<sub>29</sub>ClNO<sub>2</sub>S<sup>+</sup> ([M+NH<sub>4</sub>)<sup>+</sup>): 394.1602, found: 394.1597.

### 3. General procedure for chiral β-hydroxy allylic sulfides

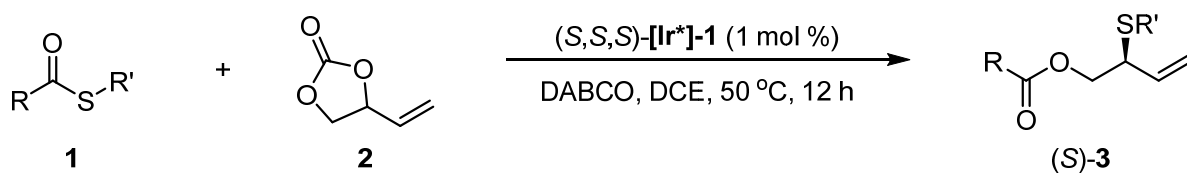

A flame dried Schlenk tube was cooled to rt and evacuated and backfilled with argon for three times. To this Schlenk tube were added (*S,S,S*)-[Ir\*]-1 (0.01 mmol, 5 mol %), aryl thioesters **1** (0.20 mmol, 1.0 equiv.), VEC **2** (0.60 mmol, 3.0 equiv.), DABCO (0.2 mmol, 1.0 equiv.) and DCE (2 mL). The reaction was stirred at 50 °C for 12 hours. Once starting material was consumed (monitored by TLC), the solvent was evaporated under reduced pressure and the residue was purified by column chromatography to give the desired product **3**, which was then directly analyzed by HPLC to



determine the enantiomeric excess.

#### 4. Spectral characterization data for the products

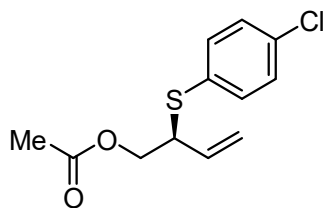

**(S)-2-((4-chlorophenyl)thio)but-3-en-1-yl acetate (3a):** yield (45.1 mg, 88%); colorless oil;  $[\alpha]^{15}_{\text{D}} = -3.6$  ( $c$  1.34,  $\text{CH}_2\text{Cl}_2$ ); The product was analyzed by HPLC to determine the enantiomeric excess: 94% ee (Chiralpak OJ-H, *i*-propanol/hexane = 2/98, flow rate 1.0 mL/min,  $\lambda = 254$  nm);  $t_{\text{r}} = 9.26$  and 9.79 min.

**$^1\text{H}$  NMR** (400 MHz, Chloroform-*d*)  $\delta$  7.41 – 7.33 (m, 2H), 7.30 – 7.24 (m, 2H), 5.73 (ddd,  $J = 17.1$ , 10.3, 8.3 Hz, 1H), 5.19 – 4.98 (m, 2H), 4.23 (d,  $J = 1.6$  Hz, 1H), 4.21 (d,  $J = 2.1$  Hz, 1H), 3.92 – 3.77 (m, 1H), 2.04 (s, 3H).

**$^{13}\text{C}$  NMR** (101 MHz, Chloroform-*d*)  $\delta$  170.7, 134.5, 134.4, 134.0, 131.6, 129.1, 118.3, 65.2, 50.3, 20.8.

**HRMS** (ESI+) Calcd. For  $\text{C}_{12}\text{H}_{13}\text{ClO}_2\text{SNa}^+$  ( $[\text{M}+\text{Na}]^+$ ): 279.0217, found: 279.0228.

#### HPLC chromatogram of compound 3a

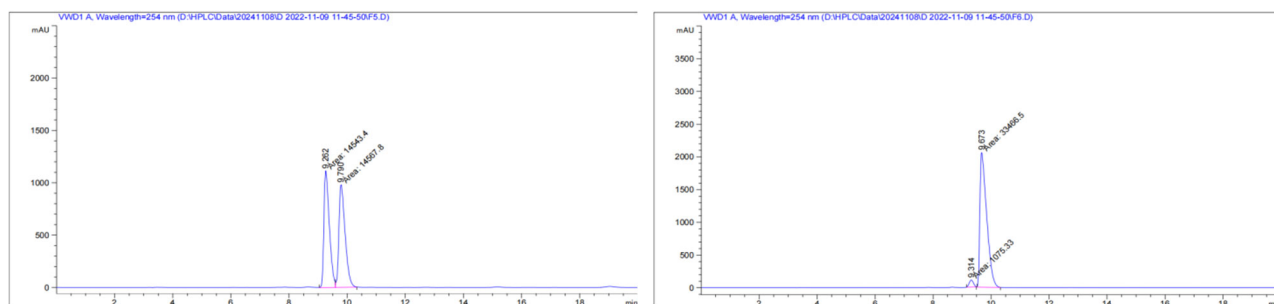

| Peak # | RetTime [min] | Type | Width [min] | Area [mAU*s] | Height [mAU] | Area %  | Peak # | RetTime [min] | Type | Width [min] | Area [mAU*s] | Height [mAU] | Area %  |
|--------|---------------|------|-------------|--------------|--------------|---------|--------|---------------|------|-------------|--------------|--------------|---------|
| 1      | 9.262         | MF   | 0.2170      | 1.45434e4    | 1117.06531   | 49.9582 | 1      | 9.314         | MM   | 0.1668      | 1075.33337   | 107.47681    | 3.1131  |
| 2      | 9.790         | FM   | 0.2474      | 1.45678e4    | 981.38940    | 50.0418 | 2      | 9.673         | MM   | 0.2712      | 3.34665e4    | 2056.40405   | 96.8869 |

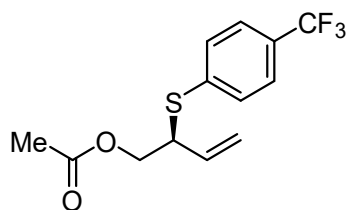

**(S)-2-((4-(trifluoromethyl)phenyl)thio)but-3-en-1-yl acetate (3b):** yield (47.6 mg, 82%); colorless oil;  $[\alpha]_D^{15} = +10.9$  ( $c$  0.70,  $\text{CH}_2\text{Cl}_2$ ); The product was analyzed by HPLC to determine the enantiomeric excess: 92% ee (Chiralpak OJ-H, *i*-propanol/hexane = 2/98, flow rate 1.0 mL/min,  $\lambda = 250$  nm);  $t_r = 9.27$  and 9.99 min.

**$^1\text{H}$  NMR (400 MHz,  $\text{CDCl}_3$ )**  $\delta$  7.57 – 7.46 (m, 4H), 5.78 (ddd,  $J = 17.1, 10.2, 8.1$  Hz, 1H), 5.26 – 5.15 (m, 2H), 4.33 – 4.19 (m, 2H), 4.09 – 3.99 (m, 1H), 2.04 (s, 3H).

**$^{13}\text{C}$  NMR (101 MHz,  $\text{CDCl}_3$ )**  $\delta$  170.7, 139.0, 134.1, 131.1, 129.0 (q,  $J = 33.0$  Hz), 125.7 (q,  $J = 3.7$  Hz), 124.0 (q,  $J = 272.1$  Hz), 118.8, 65.2, 49.2, 20.7.

**$^{19}\text{F}$  NMR (377 MHz,  $\text{CDCl}_3$ )**  $\delta$  -62.6 (s).

**HRMS (ESI+)** Calcd. For  $\text{C}_{13}\text{H}_{13}\text{F}_3\text{O}_2\text{SNa}^+$  ( $[\text{M}+\text{Na}]^+$ ): 313.0481, found: 313.0480.

### HPLC chromatogram of compound 3b

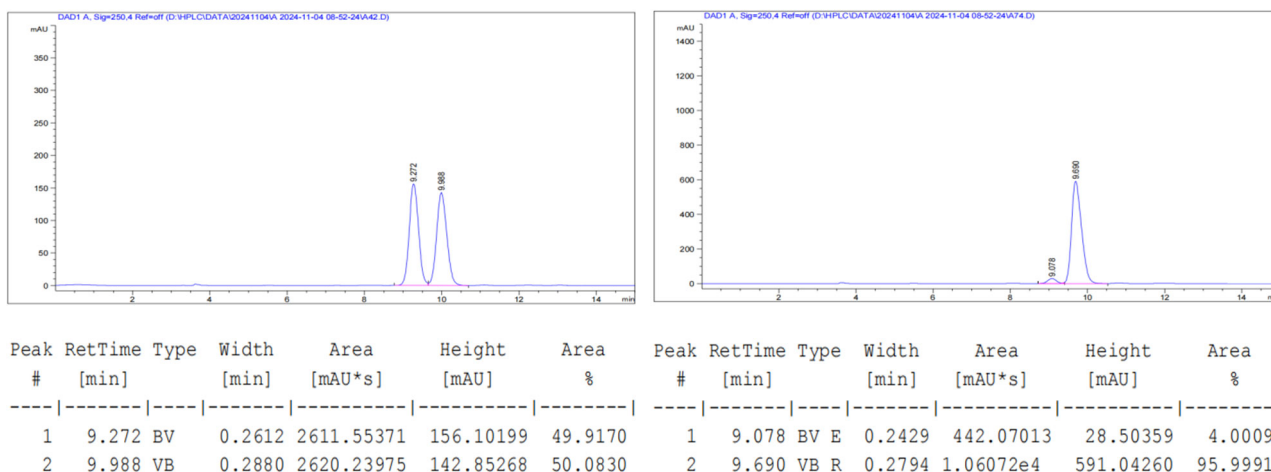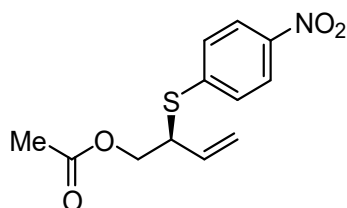

**(S)-2-((4-nitrophenyl)thio)but-3-en-1-yl acetate (3c):** yield (40.6 mg, 76%);  $[\alpha]_D^{15} = +23.3$  ( $c$  1.33,  $\text{CH}_2\text{Cl}_2$ ); The product was analyzed by HPLC to determine the enantiomeric excess: 88% ee (Chiralpak AS-H, *i*-propanol/hexane = 2/98, flow rate 1.0 mL/min,  $\lambda = 320$  nm);  $t_r = 64.96$  and 71.17 min.

**$^1\text{H}$  NMR (400 MHz,  $\text{CDCl}_3$ )**  $\delta$  8.18 – 8.08 (m, 2H), 7.47 (d,  $J = 8.9$  Hz, 2H), 5.80 (ddd,  $J = 17.1, 10.3, 7.9$  Hz, 1H), 5.32 – 5.21 (m, 2H), 4.37 – 4.21 (m, 2H), 4.20 – 4.13 (m, 1H), 2.06 (s, 3H).

**$^{13}\text{C}$  NMR (101 MHz,  $\text{CDCl}_3$ )**  $\delta$  170.6, 146.0, 144.4, 133.5, 129.2, 123.9, 119.4, 65.0, 48.6, 20.7.

**HRMS (ESI+)** Calcd. For  $\text{C}_{12}\text{H}_{13}\text{NO}_4\text{SNa}^+$  ( $[\text{M}+\text{Na}]^+$ ): 290.0458, found: 290.0460.

#### HPLC chromatogram of compound 3c

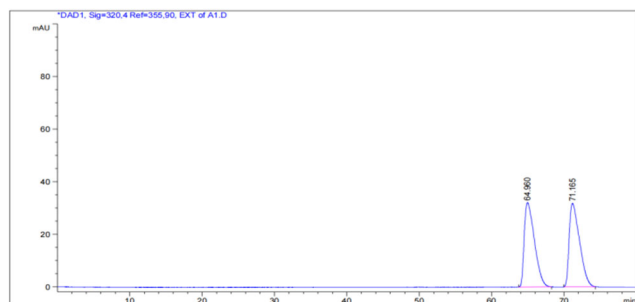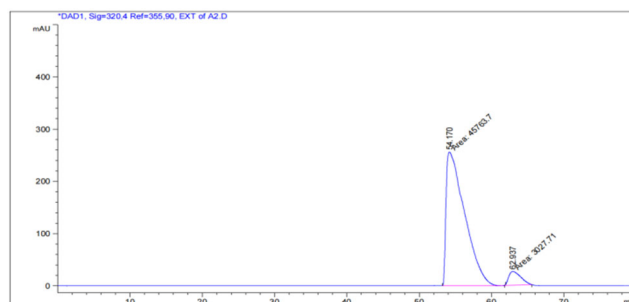

| Peak # | RetTime [min] | Type | Width [min] | Area [mAU*s] | Height [mAU] | Area %  | Peak # | RetTime [min] | Type | Width [min] | Area [mAU*s] | Height [mAU] | Area %  |
|--------|---------------|------|-------------|--------------|--------------|---------|--------|---------------|------|-------------|--------------|--------------|---------|
| 1      | 64.960        | BB   | 1.2926      | 3146.98267   | 32.13282     | 50.0006 | 1      | 54.170        | MM   | 2.9770      | 4.57637e4    | 256.20563    | 93.7946 |
| 2      | 71.165        | BB   | 1.3390      | 3146.91064   | 31.73078     | 49.9994 | 2      | 62.937        | MM   | 1.9194      | 3027.70923   | 26.29001     | 6.2054  |

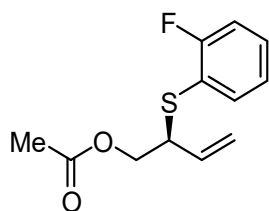

**(S)-2-((2-fluorophenyl)thio)but-3-en-1-yl acetate (3d):** yield (33.1 mg, 69%); colorless oil;  $[\alpha]_D^{15} = +1.1$  ( $c$  0.6,  $\text{CH}_2\text{Cl}_2$ ); The product was analyzed by HPLC to determine the enantiomeric excess: 88% ee (Chiralpak ID, *i*-propanol/hexane = 2/98, flow rate 1 mL/min,  $\lambda$  = 254 nm);  $t_r$  = 8.22 and 9.45 min.

**$^1\text{H}$  NMR (400 MHz,  $\text{CDCl}_3$ )**  $\delta$  7.51 – 7.41 (m, 1H), 7.33 – 7.27 (m, 1H), 7.13 – 7.03 (m, 2H), 5.74 (ddd, 1H), 5.14 – 5.05 (m, 2H), 4.30 – 4.17 (m, 2H), 4.03 – 3.93 (m, 1H), 2.03 (s, 3H).

**$^{13}\text{C}$  NMR (101 MHz,  $\text{CDCl}_3$ )**  $\delta$  170.7, 162.7 (d,  $J$  = 246.4 Hz), 136.0, 134.3, 130.3 (d,  $J$  = 8.0 Hz), 124.4 (d,  $J$  = 3.9 Hz), 120.0 (d,  $J$  = 18.0 Hz), 118.3, 115.9 (d,  $J$  = 23.2 Hz), 65.5, 49.4 (d,  $J$  = 2.6 Hz), 20.7.

**$^{19}\text{F}$  NMR (377 MHz,  $\text{CDCl}_3$ )**  $\delta$  -106.69 – -106.74 (m).

**HRMS (ESI+)** Calcd. For  $\text{C}_{12}\text{H}_{13}\text{FO}_2\text{SNa}^+$  ( $[\text{M}+\text{Na}]^+$ ): 263.0513, found: 263.0515.

#### HPLC chromatogram of compound 3d

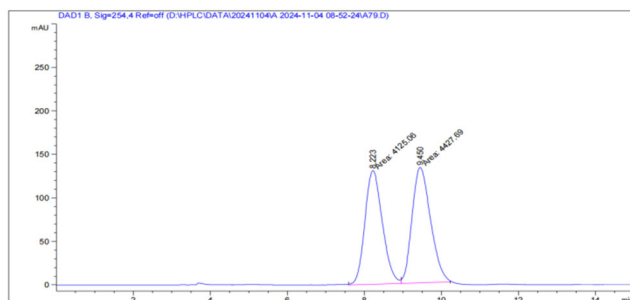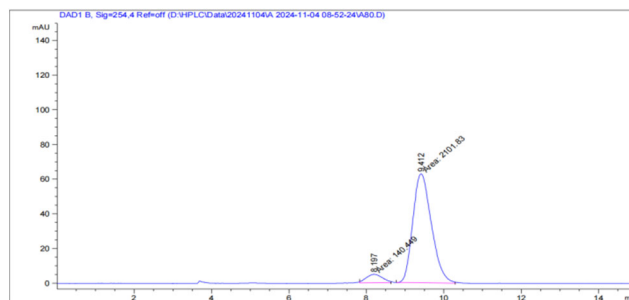

| Peak # | RetTime [min] | Type | Width [min] | Area [mAU*s] | Height [mAU] | Area %  | Peak # | RetTime [min] | Type | Width [min] | Area [mAU*s] | Height [mAU] | Area %  |
|--------|---------------|------|-------------|--------------|--------------|---------|--------|---------------|------|-------------|--------------|--------------|---------|
| 1      | 8.223         | MF   | 0.5263      | 4125.06348   | 130.62331    | 48.2308 | 1      | 8.197         | FM   | 0.4793      | 140.44933    | 4.88334      | 6.2637  |
| 2      | 9.450         | FM   | 0.5565      | 4427.69434   | 132.60344    | 51.7692 | 2      | 9.412         | MF   | 0.5570      | 2101.82861   | 62.88615     | 93.7363 |

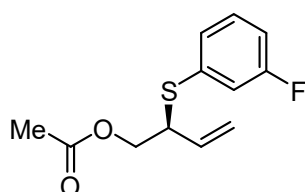

**(S)-2-((3-fluorophenyl)thio)but-3-en-1-yl acetate (3e):** yield (32.6 mg, 68%); colorless oil;  $[\alpha]_D^{15} = -9.4$  ( $c$  2.1,  $\text{CH}_2\text{Cl}_2$ ); The product was analyzed by HPLC to determine the enantiomeric excess: 91% ee (Chiralpak OD-H, *i*-propanol/hexane = 2/98, flow rate 1 mL/min,  $\lambda = 250$  nm);  $t_r = 6.51$  and 7.77 min.

**$^1\text{H}$  NMR (400 MHz,  $\text{CDCl}_3$ )**  $\delta$  7.32 – 7.21 (m, 1H), 7.21 – 7.09 (m, 2H), 6.99 – 6.89 (m, 1H), 5.76 (ddd,  $J = 17.2, 10.1, 8.2$  Hz, 1H), 5.21 – 5.10 (m, 2H), 4.30 – 4.18 (m, 2H), 3.99 – 3.89 (m, 1H), 2.04 (s, 3H).

**$^{13}\text{C}$  NMR (101 MHz,  $\text{CDCl}_3$ )**  $\delta$  170.6, 162.5 (d,  $J = 248.7$  Hz), 135.7 (d,  $J = 8.0$  Hz), 134.3, 130.1 (d,  $J = 8.5$  Hz), 127.8 (d,  $J = 2.9$  Hz), 118.9 (d,  $J = 22.2$  Hz), 118.4, 114.4 (d,  $J = 21.2$  Hz), 65.3, 49.8, 20.7.

**$^{19}\text{F}$  NMR (377 MHz,  $\text{CDCl}_3$ )**  $\delta$  -112.1 – -112.2 (m).

**HRMS (ESI+)** Calcd. For  $\text{C}_{12}\text{H}_{13}\text{FO}_2\text{SNa}^+$  ( $[\text{M}+\text{Na}]^+$ ): 263.0513, found: 263.0519.

### HPLC chromatogram of compound 3e

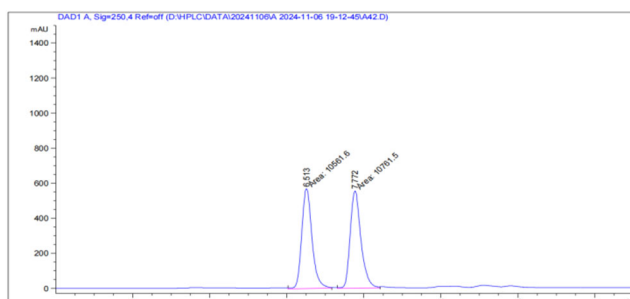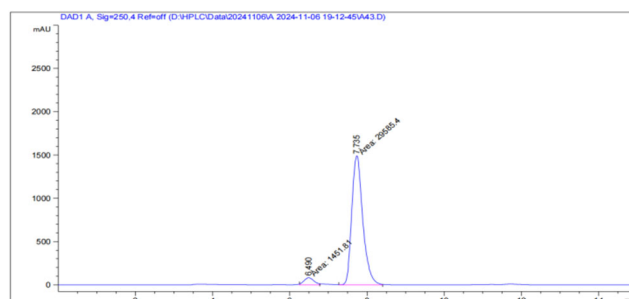

| Peak # | RetTime [min] | Type | Width [min] | Area [mAU*s] | Height [mAU] | Area %  | Peak # | RetTime [min] | Type | Width [min] | Area [mAU*s] | Height [mAU] | Area %  |
|--------|---------------|------|-------------|--------------|--------------|---------|--------|---------------|------|-------------|--------------|--------------|---------|
| 1      | 6.513         | MM   | 0.3091      | 1.05616e4    | 569.46771    | 49.5313 | 1      | 6.490         | FM   | 0.2989      | 1451.81177   | 80.94463     | 4.6776  |
| 2      | 7.772         | MM   | 0.3236      | 1.07615e4    | 554.19232    | 50.4687 | 2      | 7.735         | MF   | 0.3308      | 2.95854e4    | 1490.64099   | 95.3224 |

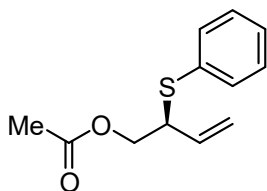

**(S)-2-(phenylthio)but-3-en-1-yl acetate (3f):** yield (38.9 mg, 88%); colorless oil;  $[\alpha]_D^{15} = +29.7$  (*c* 0.1, CH<sub>2</sub>Cl<sub>2</sub>); The product was analyzed by HPLC to determine the enantiomeric excess: 92% ee (Chiralpak IF, *i*-propanol/hexane = 2/98, flow rate 1 mL/min,  $\lambda = 254$  nm);  $t_r = 13.83$  and 16.01 min. **<sup>1</sup>H NMR (400 MHz, CDCl<sub>3</sub>)**  $\delta$  7.42 – 7.33 (m, 2H), 7.28 – 7.14 (m, 3H), 5.73-5.63 (m, 1H), 5.11 – 5.00 (m, 2H), 4.23 – 4.10 (m, 2H), 3.88 – 3.78 (m, 1H), 1.96 (s, 3H).

**<sup>13</sup>C NMR (101 MHz, CDCl<sub>3</sub>)**  $\delta$  170.7, 134.7, 133.1, 133.0, 128.9, 127.7, 118.0, 65.4, 50.0, 20.8.

**HRMS (ESI+)** Calcd. For C<sub>12</sub>H<sub>14</sub>O<sub>2</sub>SN<sup>+</sup> ([M+Na]<sup>+</sup>): 245.0607, found: 245.0616.

#### HPLC chromatogram of compound 3f

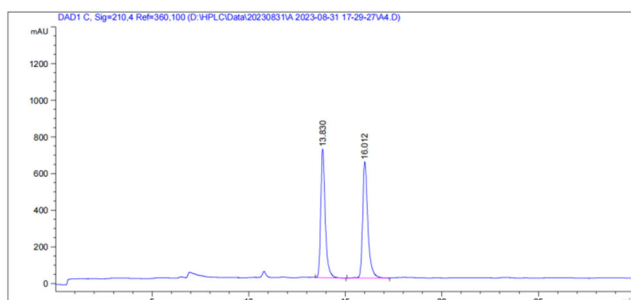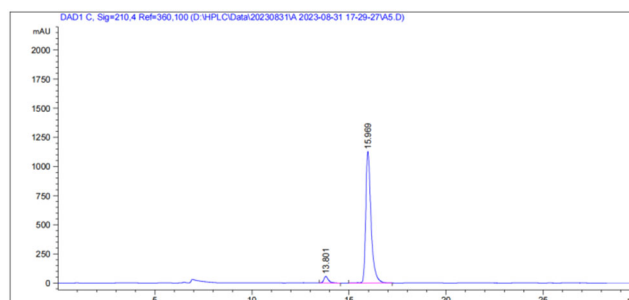

| Peak # | RetTime [min] | Type | Width [min] | Area [mAU*s] | Height [mAU] | Area %  | Peak # | RetTime [min] | Type | Width [min] | Area [mAU*s] | Height [mAU] | Area %  |
|--------|---------------|------|-------------|--------------|--------------|---------|--------|---------------|------|-------------|--------------|--------------|---------|
| 1      | 13.830        | BB   | 0.2441      | 1.13043e4    | 701.07544    | 48.7537 | 1      | 13.801        | BB   | 0.2421      | 918.56689    | 56.38351     | 4.1313  |
| 2      | 16.012        | BB   | 0.2826      | 1.18823e4    | 634.07996    | 51.2463 | 2      | 15.969        | VB R | 0.2817      | 2.13155e4    | 1129.28015   | 95.8687 |

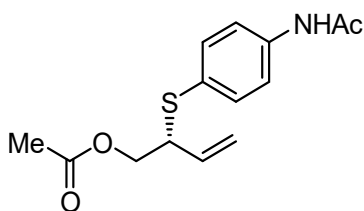

**(R)-2-((4-acetamidophenyl)thio)but-3-en-1-yl acetate (3g):** using (*R,R,R*)-[Ir\*]-1 as the catalyst, yield (39.1 mg, 70%); colorless oil;  $[\alpha]_D^{15} = -6.8$  (*c* 0.8, CH<sub>2</sub>Cl<sub>2</sub>); The product was analyzed by HPLC

to determine the enantiomeric excess: 81% ee (Chiralpak OD-H, *i*-propanol/hexane = 5/95, flow rate 1.0 mL/min,  $\lambda$  = 220 nm);  $t_r$  = 9.26 and 9.79 min.

**$^1\text{H}$  NMR (400 MHz,  $\text{CDCl}_3$ )**  $\delta$  7.50 (d,  $J$  = 8.5 Hz, 2H), 7.07 (d,  $J$  = 8.4 Hz, 2H), 5.78 (ddd,  $J$  = 17.3, 10.1, 8.2 Hz, 1H), 5.29 – 5.12 (m, 2H), 4.34 – 4.14 (m, 2H), 4.07 – 3.92 (m, 1H), 2.27 (s, 6H), 2.04 (s, 3H).

**$^{13}\text{C}$  NMR (101 MHz,  $\text{CDCl}_3$ )**  $\delta$  172.8, 170.7, 138.4, 135.2, 134.3, 133.1, 129.2, 118.4, 65.3, 49.8, 26.9, 20.8.

**HRMS (ESI+)** Calcd. For  $\text{C}_{14}\text{H}_{17}\text{NO}_3\text{SNa}^+$  ( $[\text{M}+\text{Na}]^+$ ): 302.0821, found: 302.0825.

### HPLC chromatogram of compound 3g

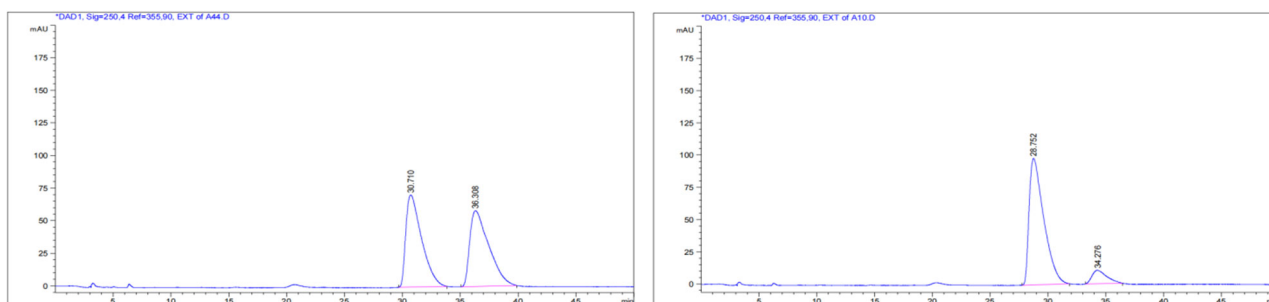

| Peak # | RetTime [min] | Type | Width [min] | Area [mAU*s] | Height [mAU] | Area %  | Peak # | RetTime [min] | Type | Width [min] | Area [mAU*s] | Height [mAU] | Area %  |
|--------|---------------|------|-------------|--------------|--------------|---------|--------|---------------|------|-------------|--------------|--------------|---------|
| 1      | 30.710        | BB   | 1.1186      | 6697.73730   | 70.54850     | 50.2232 | 1      | 28.752        | BB   | 1.0327      | 8643.37793   | 98.12006     | 90.3584 |
| 2      | 36.308        | BB   | 1.3358      | 6638.20801   | 58.19339     | 49.7768 | 2      | 34.276        | BV R | 1.0382      | 922.28339    | 10.39418     | 9.6416  |

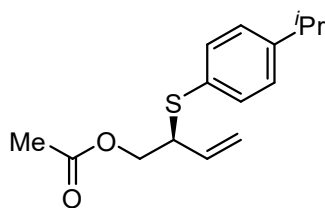

**(S)-2-((4-isopropylphenyl)thio)but-3-en-1-yl acetate (3h)**: yield (34.9 mg, 85%); colorless oil;  $[\alpha]_D^{15} = +4.3$  ( $c$  1.30,  $\text{CH}_2\text{Cl}_2$ ); The product was analyzed by HPLC to determine the enantiomeric excess: 93% ee (Chiralpak OJ-H, *i*-propanol/hexane = 2/98, flow rate 0.5 mL/min,  $\lambda$  = 220 nm);  $t_r$  = 15.38 and 16.32 min.

**$^1\text{H}$  NMR (400 MHz,  $\text{CDCl}_3$ )**  $\delta$  7.41 – 7.33 (m, 2H), 7.21 – 7.10 (m, 2H), 5.77 (ddd,  $J$  = 17.4, 9.9, 8.3 Hz, 1H), 5.18 – 5.07 (m, 2H), 4.28 – 4.16 (m, 2H), 3.89 – 3.79 (m, 1H), 2.96 – 2.81 (m, 1H), 2.02 (s, 3H), 1.23 (d,  $J$  = 7.0 Hz, 6H).

**$^{13}\text{C}$  NMR (101 MHz,  $\text{CDCl}_3$ )**  $\delta$  170.7, 148.8, 134.9, 133.6, 129.6, 127.0, 117.8, 65.5, 50.1, 33.7,

23.8, 20.8.

**HRMS** (ESI+) Calcd. For  $C_{15}H_{20}O_2SNa^+$  ( $[M+Na]^+$ ): 287.1076, found: 287.1078.

### HPLC chromatogram of compound 3h

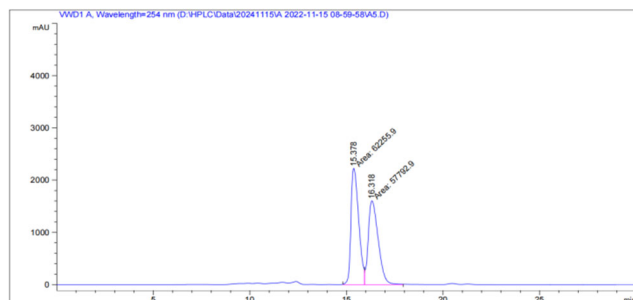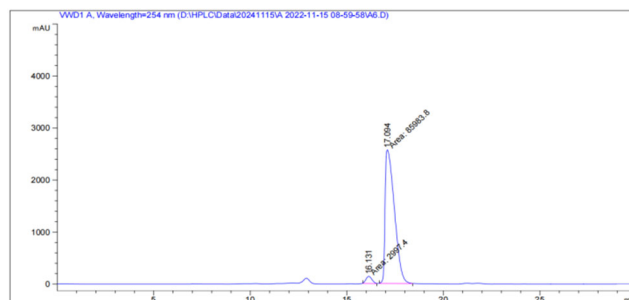

| Peak # | RetTime [min] | Type | Width [min] | Area [mAU*s] | Height [mAU] | Area %  | Peak # | RetTime [min] | Type | Width [min] | Area [mAU*s] | Height [mAU] | Area %  |
|--------|---------------|------|-------------|--------------|--------------|---------|--------|---------------|------|-------------|--------------|--------------|---------|
| 1      | 15.378        | MF   | 0.4660      | 6.22559e4    | 2226.71997   | 51.8588 | 1      | 16.131        | MM   | 0.3609      | 2997.40088   | 138.41592    | 3.3686  |
| 2      | 16.318        | FM   | 0.6002      | 5.77929e4    | 1604.94336   | 48.1412 | 2      | 17.094        | MM   | 0.5579      | 8.59838e4    | 2568.54980   | 96.6314 |

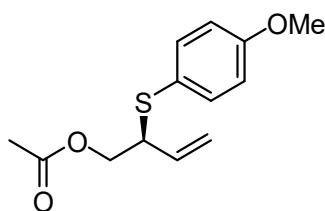

**(S)-2-((4-methoxyphenyl)thio)but-3-en-1-yl acetate (3i)**: yield (43.6 mg, 86%); colorless oil;  $[\alpha]^{15}_D = -2.0$  ( $c$  0.81,  $CH_2Cl_2$ ); The product was analyzed by HPLC to determine the enantiomeric excess: 91% ee (Chiralpak OJ-H, *i*-propanol/hexane = 2/98, flow rate 1 mL/min,  $\lambda = 254$  nm);  $t_r = 17.26$  and 24.92 min.

**$^1H$  NMR (400 MHz,  $CDCl_3$ )**  $\delta$  7.44 – 7.35 (m, 2H), 6.88 – 6.79 (m, 2H), 5.72 (ddd,  $J = 17.1, 10.3, 8.4$  Hz, 1H), 5.13 – 4.98 (m, 2H), 4.25 – 4.12 (m, 2H), 3.80 (s, 3H), 3.76 – 3.66 (m, 1H), 2.04 (s, 3H).

**$^{13}C$  NMR (101 MHz,  $CDCl_3$ )**  $\delta$  170.7, 159.9, 136.5, 134.9, 122.8, 117.6, 114.4, 65.3, 55.3, 50.9, 20.8.

**HRMS** (ESI+) Calcd. For  $C_{13}H_{16}O_3SNa^+$  ( $[M+Na]^+$ ): 275.0712, found: 275.0716.

### HPLC chromatogram of compound 3i

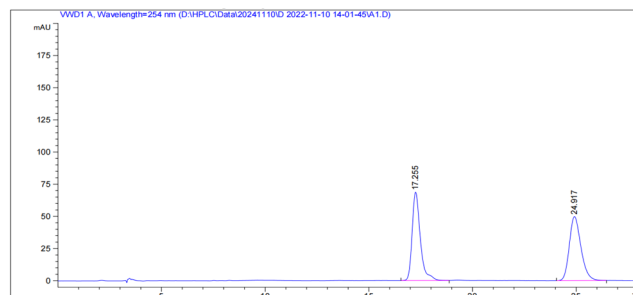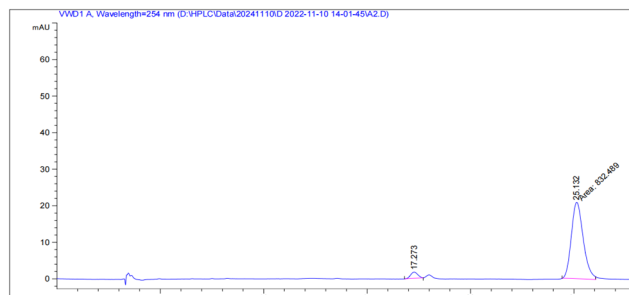



| Peak # | RetTime [min] | Type | Width [min] | Area [mAU*s] | Height [mAU] | Area %  | Peak # | RetTime [min] | Type | Width [min] | Area [mAU*s] | Height [mAU] | Area %  |
|--------|---------------|------|-------------|--------------|--------------|---------|--------|---------------|------|-------------|--------------|--------------|---------|
| 1      | 17.255        | BB   | 0.4140      | 1882.38403   | 68.62749     | 49.2953 | 1      | 17.273        | BB   | 0.3649      | 40.37965     | 1.70767      | 4.6261  |
| 2      | 24.917        | BB   | 0.5943      | 1936.20618   | 49.72767     | 50.7047 | 2      | 25.132        | MM   | 0.6634      | 832.48859    | 20.91449     | 95.3739 |

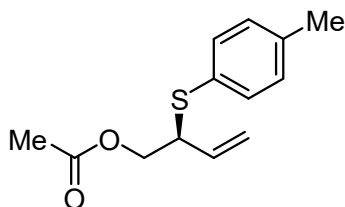

**(S)-2-(p-tolylthio)but-3-en-1-yl acetate (3j):** yield (36.6 mg, 77%); colorless oil;  $[\alpha]^{15}_D = +6.0$  ( $c$  0.3,  $\text{CH}_2\text{Cl}_2$ ); The product was analyzed by HPLC to determine the enantiomeric excess: 94% ee (Chiralpak OJ-H, *i*-propanol/hexane = 2/98, flow rate 1.0 mL/min,  $\lambda = 254$  nm);  $t_r = 9.26$  and 9.79 min.

**$^1\text{H}$  NMR** (400 MHz, Chloroform- $d$ )  $\delta$  7.30 – 7.23 (m, 2H), 7.07 – 7.01 (m, 2H), 5.68 (ddd,  $J = 17.0$ , 10.3, 8.3 Hz, 1H), 5.09 – 4.97 (m, 2H), 4.15 (d,  $J = 1.2$  Hz, 1H), 4.13 (d,  $J = 1.9$  Hz, 1H), 3.79 – 3.70 (m, 1H), 2.26 (s, 3H), 1.96 (s, 3H).

**$^{13}\text{C}$  NMR** (101 MHz, Chloroform- $d$ )  $\delta$  170.7, 138.0, 134.9, 133.8, 129.7, 129.1, 117.8, 65.4, 50.3, 21.1, 20.8.

**HRMS** (ESI+) Calcd. For  $\text{C}_{13}\text{H}_{16}\text{O}_2\text{SNa}^+$  ( $[\text{M}+\text{Na}]^+$ ): 259.0763, found: 259.0766.

### HPLC chromatogram of compound 3j

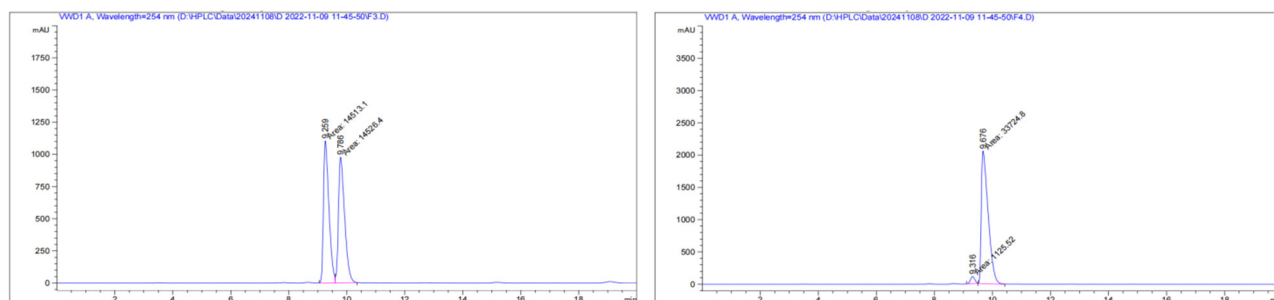

| Peak # | RetTime [min] | Type | Width [min] | Area [mAU*s] | Height [mAU] | Area %  | Peak # | RetTime [min] | Type | Width [min] | Area [mAU*s] | Height [mAU] | Area %  |
|--------|---------------|------|-------------|--------------|--------------|---------|--------|---------------|------|-------------|--------------|--------------|---------|
| 1      | 9.259         | MF   | 0.2189      | 1.45131e4    | 1105.12683   | 49.9770 | 1      | 9.316         | MM   | 0.1712      | 1125.52075   | 109.54490    | 3.2296  |
| 2      | 9.786         | FM   | 0.2478      | 1.45264e4    | 976.92548    | 50.0230 | 2      | 9.676         | MM   | 0.2733      | 3.37248e4    | 2056.45654   | 96.7704 |



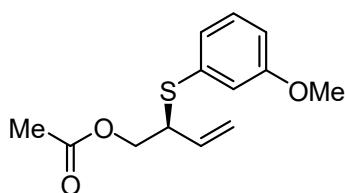

**(S)-2-((3-methoxyphenyl)thio)but-3-en-1-yl acetate (3k):** yield (40.3 mg, 80%); colorless oil;  $[\alpha]^{15}_D = +10.6$  ( $c$  1.23,  $\text{CH}_2\text{Cl}_2$ ); The product was analyzed by HPLC to determine the enantiomeric excess: 93% ee (Chiralpak OJ-H, *i*-propanol/hexane = 2/98, flow rate 1 mL/min,  $\lambda = 250$  nm);  $t_r = 16.09$  and 17.12 min.

**$^1\text{H}$  NMR (400 MHz,  $\text{CDCl}_3$ )**  $\delta$  7.25 – 7.17 (m, 1H), 7.06 – 6.94 (m, 2H), 6.84 – 6.75 (m, 1H), 5.85–5.71 (ddd, 1H), 5.22 – 5.11 (m, 2H), 4.31 – 4.17 (m, 2H), 3.99 – 3.88 (m, 1H), 3.80 (s, 3H), 2.04 (s, 3H).

**$^{13}\text{C}$  NMR (101 MHz,  $\text{CDCl}_3$ )**  $\delta$  170.7, 159.7, 134.7, 134.5, 129.7, 124.7, 118.1, 117.7, 113.4, 65.4, 55.3, 49.7, 20.8.

**HRMS (ESI+)** Calcd. For  $\text{C}_{13}\text{H}_{16}\text{O}_3\text{SNa}^+$  ( $[\text{M}+\text{Na}]^+$ ): 275.0712, found: 275.0703.

#### HPLC chromatogram of compound 3k

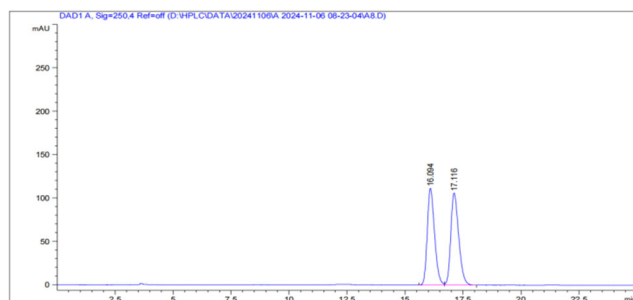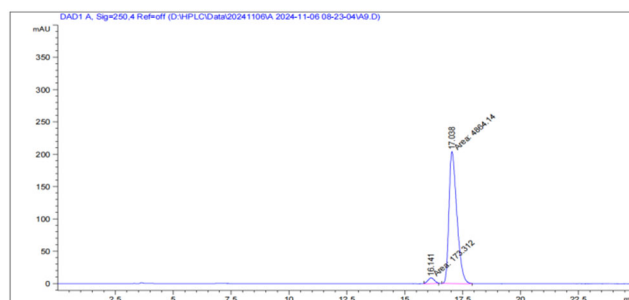

| Peak # | RetTime [min] | Type | Width [min] | Area [mAU*s] | Height [mAU] | Area %  | Peak # | RetTime [min] | Type | Width [min] | Area [mAU*s] | Height [mAU] | Area %  |
|--------|---------------|------|-------------|--------------|--------------|---------|--------|---------------|------|-------------|--------------|--------------|---------|
| 1      | 16.094        | BV   | 0.3342      | 2433.33862   | 111.67866    | 49.1656 | 1      | 16.141        | MM   | 0.3295      | 173.31224    | 8.76756      | 3.4405  |
| 2      | 17.116        | VB   | 0.3626      | 2515.93579   | 106.10332    | 50.8344 | 2      | 17.038        | MM   | 0.3973      | 4864.13525   | 204.06253    | 96.5595 |

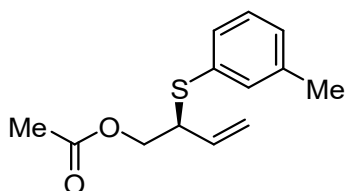

**(S)-2-(m-tolylthio)but-3-en-1-yl acetate (3l):** yield (34.5 mg, 73%); colorless oil;  $[\alpha]^{15}_D = +7.0$  ( $c$  0.52,  $\text{CH}_2\text{Cl}_2$ ); The product was analyzed by HPLC to determine the enantiomeric excess: 92% ee (Chiralpak OJ-H, *i*-propanol/hexane = 2/98, flow rate 1 mL/min,  $\lambda = 254$  nm);  $t_r = 7.93$  and 8.71 min.

**<sup>1</sup>H NMR (400 MHz, CDCl<sub>3</sub>)** δ 7.27 – 7.22 (m, 2H), 7.23 – 7.13 (m, 1H), 7.10 – 7.03 (m, 1H), 5.77 (ddd, *J* = 17.2, 10.0, 8.2 Hz, 1H), 5.26 – 5.04 (m, 2H), 4.29 – 4.15 (m, 2H), 3.95 – 3.84 (m, 1H), 2.33 (s, 3H), 2.03 (s, 3H).

**<sup>13</sup>C NMR (101 MHz, CDCl<sub>3</sub>)** δ 170.8, 138.7, 134.8, 133.5, 132.8, 129.9, 128.7, 128.5, 117.9, 65.5, 49.8, 21.2, 20.8.

**HRMS (ESI<sup>+</sup>)** Calcd. For C<sub>13</sub>H<sub>16</sub>O<sub>2</sub>SN<sup>+</sup> ([M+Na]<sup>+</sup>): 259.0763, found: 259.0761.

#### HPLC chromatogram of compound 3l

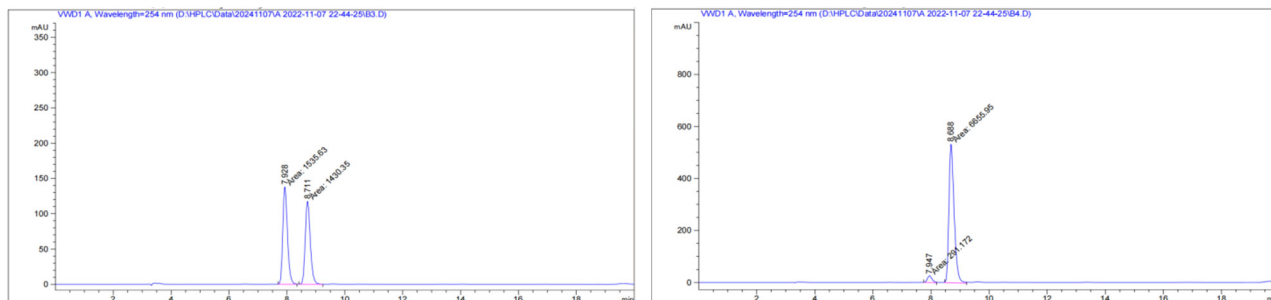

| Peak # | RetTime [min] | Type | Width [min] | Area [mAU*s] | Height [mAU] | Area %  | Peak # | RetTime [min] | Type | Width [min] | Area [mAU*s] | Height [mAU] | Area %  |
|--------|---------------|------|-------------|--------------|--------------|---------|--------|---------------|------|-------------|--------------|--------------|---------|
| 1      | 7.928         | MM   | 0.1856      | 1535.62573   | 137.87798    | 51.7747 | 1      | 7.947         | MM   | 0.1893      | 291.17233    | 25.63072     | 4.1913  |
| 2      | 8.711         | MM   | 0.2027      | 1430.35254   | 117.60011    | 48.2253 | 2      | 8.688         | MM   | 0.2078      | 6655.94580   | 533.75629    | 95.8087 |

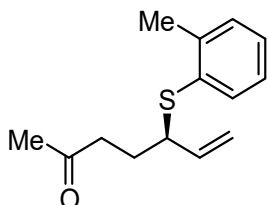

**(S)- 2-(o-tolylthio)but-3-en-1-yl acetate (3m):** yield (29.3 mg, 62%); colorless oil; [ $\alpha$ ]<sub>D</sub><sup>15</sup> = +4.5 (*c* 0.6, CH<sub>2</sub>Cl<sub>2</sub>); The product was analyzed by HPLC to determine the enantiomeric excess: 92% ee (Chiralpak OD-H, *i*-propanol/hexane = 3/97, flow rate 1 mL/min,  $\lambda$  = 254 nm); *t<sub>r</sub>* = 5.61 and 6.28 min.

**<sup>1</sup>H NMR (400 MHz, CDCl<sub>3</sub>)** δ 7.44 (dd, *J* = 7.1, 2.0 Hz, 1H), 7.22 – 7.10 (m, 3H), 5.78 (ddd, *J* = 17.3, 10.1, 8.3 Hz, 1H), 5.18 – 5.07 (m, 2H), 4.33 – 4.17 (m, 2H), 3.92 – 3.82 (m, 1H), 2.44 (s, 3H), 2.03 (s, 3H).

**<sup>13</sup>C NMR (101 MHz, CDCl<sub>3</sub>)** δ 170.7, 140.5, 134.7, 133.3, 132.6, 130.4, 127.7, 126.4, 117.9, 65.5, 49.6, 20.9, 20.8.

**HRMS (ESI<sup>+</sup>)** Calcd. For C<sub>13</sub>H<sub>16</sub>O<sub>2</sub>SN<sup>+</sup> ([M+Na]<sup>+</sup>): 259.0764, found: 259.0774.

#### HPLC chromatogram of compound 3m

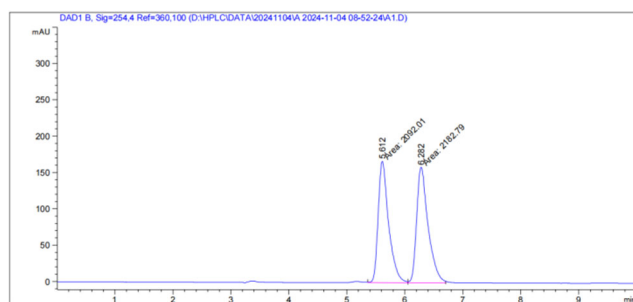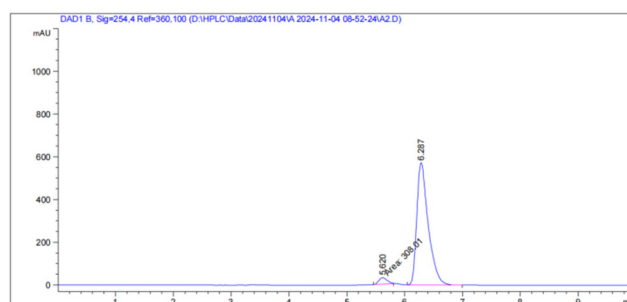

| Peak # | RetTime [min] | Type | Width [min] | Area [mAU*s] | Height [mAU] | Area %  | Peak # | RetTime [min] | Type | Width [min] | Area [mAU*s] | Height [mAU] | Area %  |
|--------|---------------|------|-------------|--------------|--------------|---------|--------|---------------|------|-------------|--------------|--------------|---------|
| 1      | 5.612         | FM   | 0.2086      | 2092.01196   | 167.11705    | 48.9382 | 1      | 5.620         | MM   | 0.1692      | 308.01038    | 30.33475     | 3.7639  |
| 2      | 6.282         | MF   | 0.2286      | 2182.79443   | 159.12639    | 51.0618 | 2      | 6.287         | VB   | 0.2025      | 7875.28418   | 572.52356    | 96.2361 |

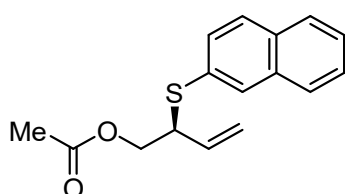

**(S)-2-(naphthalen-2-ylthio)but-3-en-1-yl acetate (3n):** yield (45.2 mg, 83%); colorless oil;  $[\alpha]^{15}_D = +11.2$  ( $c$  1.98,  $\text{CH}_2\text{Cl}_2$ ); The product was analyzed by HPLC to determine the enantiomeric excess: 94% ee (Chiralpak OJ-H, *i*-propanol/hexane = 2/98, flow rate 1 mL/min,  $\lambda = 254$  nm);  $t_r = 20.05$  and 22.37 min.

**$^1\text{H}$  NMR (400 MHz,  $\text{CDCl}_3$ )**  $\delta$  7.94 (d,  $J = 1.7$  Hz, 1H), 7.85 – 7.74 (m, 3H), 7.54 – 7.43 (m, 3H), 5.82 (ddd,  $J = 17.0, 10.3, 8.3$  Hz, 1H), 5.21 – 5.10 (m, 2H), 4.36 – 4.23 (m, 2H), 4.08 – 3.98 (m, 1H), 2.03 (s, 3H).

**$^{13}\text{C}$  NMR (101 MHz,  $\text{CDCl}_3$ )**  $\delta$  170.7, 134.6, 133.6, 132.5, 131.8, 130.5, 130.0, 128.4, 127.7, 127.5, 126.5, 126.3, 118.1, 65.5, 49.9, 20.8.

**HRMS (ESI+)** Calcd. For  $\text{C}_{16}\text{H}_{16}\text{O}_2\text{SNa}^+$  ( $[\text{M}+\text{Na}]^+$ ): 295.0763, found: 295.0754.

### HPLC chromatogram of compound 3n

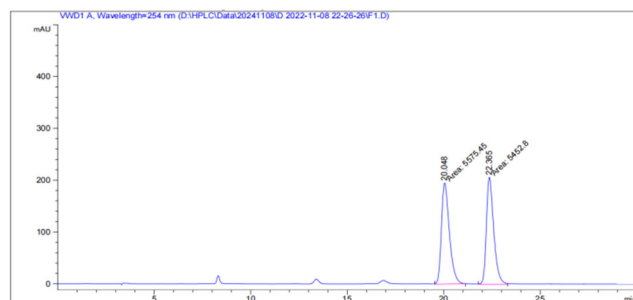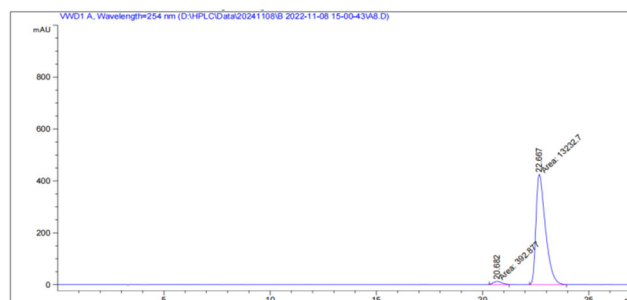

| Peak # | RetTime [min] | Type | Width [min] | Area [mAU*s] | Height [mAU] | Area %  | Peak # | RetTime [min] | Type | Width [min] | Area [mAU*s] | Height [mAU] | Area %  |
|--------|---------------|------|-------------|--------------|--------------|---------|--------|---------------|------|-------------|--------------|--------------|---------|
| 1      | 20.048        | MM   | 0.4758      | 5575.45166   | 195.30965    | 50.5561 | 1      | 20.682        | MF   | 0.4989      | 392.87747    | 13.12354     | 2.8834  |
| 2      | 22.365        | MM   | 0.4401      | 5452.80420   | 206.51262    | 49.4439 | 2      | 22.667        | MF   | 0.5183      | 1.32327e4    | 425.55124    | 97.1166 |

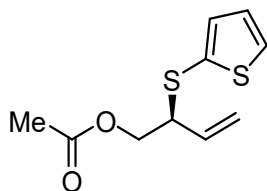

**(S)-2-(thiophen-2-ylthio)but-3-en-1-yl acetate (3o):** yield (27.4 mg, 60%); colorless oil;  $[\alpha]^{15}_D = +5.86$  ( $c$  1.00,  $\text{CH}_2\text{Cl}_2$ ); The product was analyzed by HPLC to determine the enantiomeric excess: 93% ee (Chiralpak AS-H, *i*-propanol/hexane = 2/98, flow rate 1 mL/min,  $\lambda = 250$  nm);  $t_r = 9.28$  and 10.64 min.

**$^1\text{H}$  NMR (400 MHz,  $\text{CDCl}_3$ )**  $\delta$  7.38 (dd,  $J = 5.4, 1.2$  Hz, 1H), 7.15 (d,  $J = 2.3$  Hz, 1H), 6.99 (dd,  $J = 5.4, 3.5$  Hz, 1H), 5.74 (ddd,  $J = 17.0, 10.3, 8.4$  Hz, 1H), 5.17 – 5.02 (m, 2H), 4.23 (d,  $J = 6.8$  Hz, 2H), 3.73 – 3.63 (m, 1H), 2.06 (s, 3H).

**$^{13}\text{C}$  NMR (101 MHz,  $\text{CDCl}_3$ )**  $\delta$  170.7, 136.3, 134.2, 130.8, 130.2, 127.6, 118.3, 64.8, 52.2, 20.8.

**HRMS (ESI+)** Calcd. For  $\text{C}_{10}\text{H}_{12}\text{O}_2\text{S}_2\text{Na}^+$  ( $[\text{M}+\text{Na}]^+$ ): 251.0171, found: 251.0168.

#### HPLC chromatogram of compound 3o

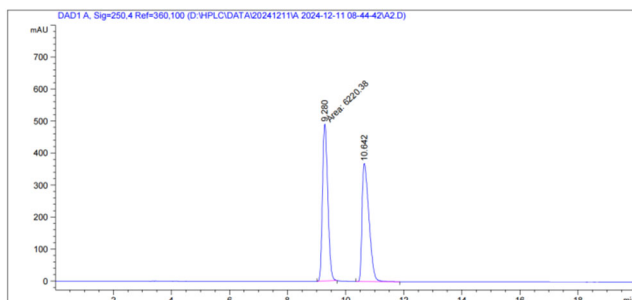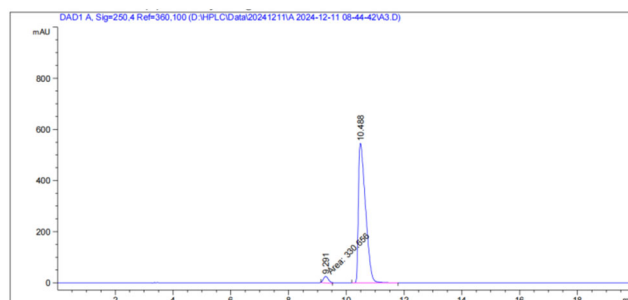

| Peak # | RetTime [min] | Type | Width [min] | Area [mAU*s] | Height [mAU] | Area %  | Peak # | RetTime [min] | Type | Width [min] | Area [mAU*s] | Height [mAU] | Area %  |
|--------|---------------|------|-------------|--------------|--------------|---------|--------|---------------|------|-------------|--------------|--------------|---------|
| 1      | 9.280         | MM   | 0.2115      | 6220.38232   | 490.27914    | 50.6062 | 1      | 9.291         | MM   | 0.2102      | 330.65588    | 26.22366     | 3.4258  |
| 2      | 10.642        | BB   | 0.2561      | 6071.36279   | 368.79669    | 49.3938 | 2      | 10.488        | BB   | 0.2672      | 9321.19922   | 545.92517    | 96.5742 |

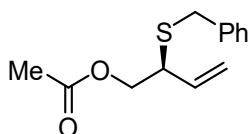

**(S)-2-(benzylthio)but-3-en-1-yl acetate (3p):** yield (34.0 mg, 72%); colorless oil;  $[\alpha]^{15}_D = +41.2$  ( $c$

1.80, CH<sub>2</sub>Cl<sub>2</sub>); The product was analyzed by HPLC to determine the enantiomeric excess: 97% ee (Chiralpak OJ-H, *i*-propanol/hexane = 2/98, flow rate 1 mL/min,  $\lambda$  = 254 nm);  $t_r$  = 14.21 and 15.56 min.

**<sup>1</sup>H NMR (400 MHz, CDCl<sub>3</sub>)**  $\delta$  7.35 – 7.28 (m, 4H), 7.26 – 7.20 (m, 1H), 5.73 (ddd,  $J$  = 17.0, 10.2, 8.7 Hz, 1H), 5.24 – 5.08 (m, 2H), 4.25 – 4.12 (m, 2H), 3.80 – 3.63 (m, 2H), 3.45 – 3.35 (m, 1H), 2.04 (s, 3H).

**<sup>13</sup>C NMR (101 MHz, CDCl<sub>3</sub>)**  $\delta$  170.6, 137.8, 135.2, 128.9, 128.5, 127.1, 117.5, 65.3, 46.4, 34.8, 20.8.

**HRMS (ESI+)** Calcd. For C<sub>13</sub>H<sub>16</sub>O<sub>2</sub>SNa<sup>+</sup> ([M+Na]<sup>+</sup>): 259.0763, found: 259.0760.

### HPLC chromatogram of compound 3p

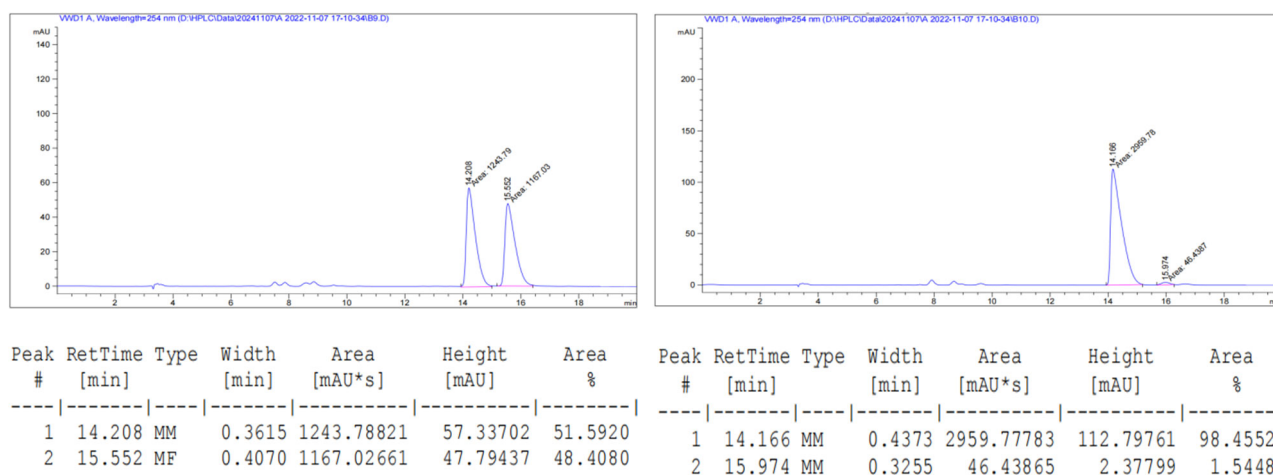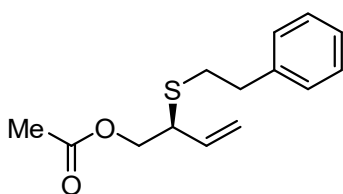

**(S)-2-(phenethylthio)but-3-en-1-yl acetate (3q):** yield (38 mg, 76%); colorless oil;  $[\alpha]_D^{15}$  = -2.7 (*c* 3.00, CH<sub>2</sub>Cl<sub>2</sub>); The product was analyzed by HPLC to determine the enantiomeric excess: 96% ee (Chiralpak OD-H, *i*-propanol/hexane = 2/98, flow rate 1 mL/min,  $\lambda$  = 254 nm);  $t_r$  = 10.37 and 11.42 min.

**<sup>1</sup>H NMR (400 MHz, CDCl<sub>3</sub>)**  $\delta$  7.34 – 7.27 (m, 2H), 7.25 – 7.15 (m, 3H), 5.69 (ddd,  $J$  = 17.0, 10.2, 8.8 Hz, 1H), 5.21 – 5.10 (m, 2H), 4.26 – 4.12 (m, 2H), 3.56 – 3.46 (m, 1H), 2.92 – 2.83 (m, 2H), 2.80 – 2.72 (m, 2H), 2.07 (s, 3H).

**<sup>13</sup>C NMR (101 MHz, CDCl<sub>3</sub>)**  $\delta$  170.7, 140.3, 135.4, 128.49, 128.46, 126.4, 117.4, 65.4, 47.1, 36.2,

31.9, 20.8.

**HRMS** (ESI+) Calcd. For  $C_{14}H_{18}O_2SNa^+$  ( $[M+Na]^+$ ): 273.0920, found: 273.0925.

#### HPLC chromatogram of compound 3q

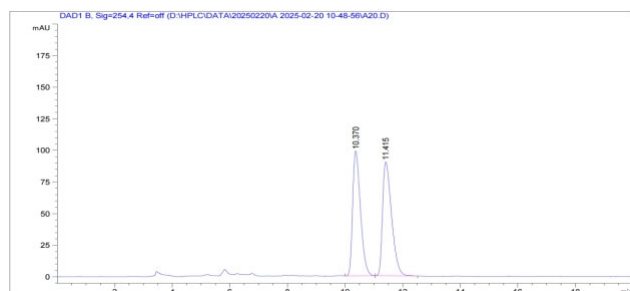

| Peak # | RetTime [min] | Type | Width [min] | Area [mAU*s] | Height [mAU] | Area %  |
|--------|---------------|------|-------------|--------------|--------------|---------|
| 1      | 10.370        | BB   | 0.2902      | 1863.20654   | 98.71007     | 48.7579 |
| 2      | 11.415        | BB   | 0.3316      | 1958.13733   | 90.09667     | 51.2421 |

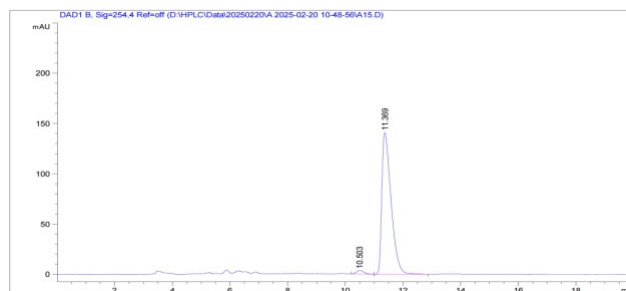

| Peak # | RetTime [min] | Type | Width [min] | Area [mAU*s] | Height [mAU] | Area %  |
|--------|---------------|------|-------------|--------------|--------------|---------|
| 1      | 10.503        | BB   | 0.2424      | 64.29920     | 3.60041      | 2.0110  |
| 2      | 11.369        | BB   | 0.3395      | 3133.07056   | 140.86646    | 97.9890 |

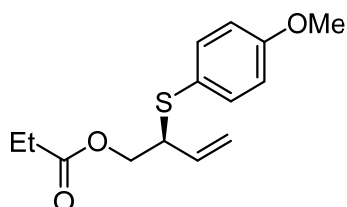

**(S)-2-((4-methoxyphenyl)thio)but-3-en-1-yl propionate (3r)**: yield (41.5 mg, 78%); colorless oil;  $[\alpha]_D^{15} = -4.3$  ( $c$  1.01,  $CH_2Cl_2$ ); The product was analyzed by HPLC to determine the enantiomeric excess: 94% ee (Chiralpak AS-H, *i*-propanol/hexane = 2/98, flow rate 1 mL/min,  $\lambda = 242$  nm);  $t_r = 8.78$  and 9.23 min.

**$^1H$  NMR (400 MHz,  $CDCl_3$ )**  $\delta$  7.44 – 7.35 (m, 2H), 6.87 – 6.79 (m, 2H), 5.72 (ddd,  $J = 17.1, 10.3, 8.4$  Hz, 1H), 5.12 – 4.97 (m, 2H), 4.26 – 4.14 (m, 2H), 3.79 (s, 3H), 3.77 – 3.66 (m, 1H), 2.31 (q,  $J = 7.6$  Hz, 2H), 1.12 (t,  $J = 7.6$  Hz, 3H).

**$^{13}C$  NMR (101 MHz,  $CDCl_3$ )**  $\delta$  174.1, 159.9, 136.4, 135.0, 122.9, 117.6, 114.4, 65.1, 55.3, 50.9, 27.4, 9.1.

**HRMS** (ESI+) Calcd. For  $C_{14}H_{18}O_3SNa^+$  ( $[M+Na]^+$ ): 289.0869, found: 289.0865.

#### HPLC chromatogram of compound 3r

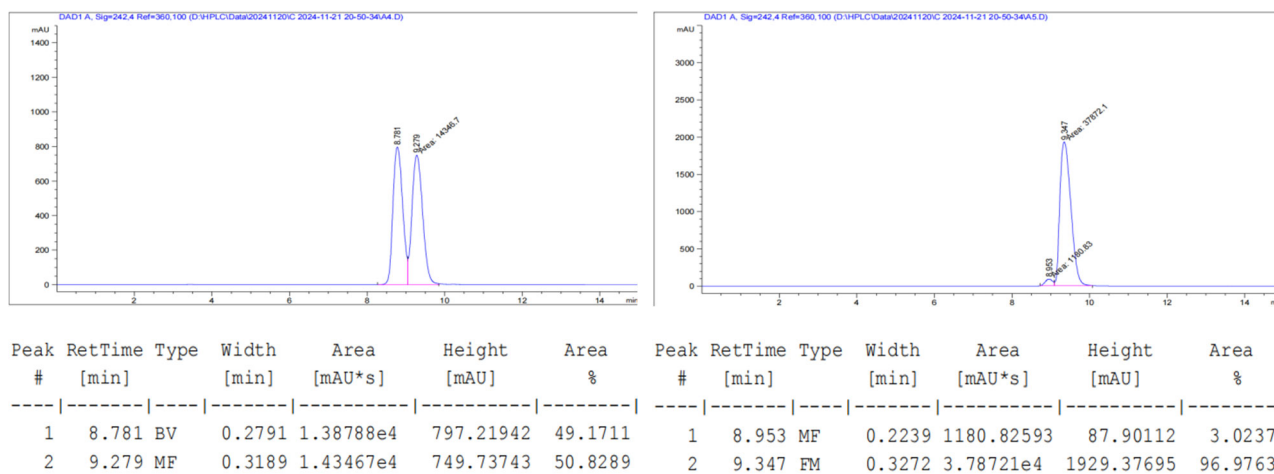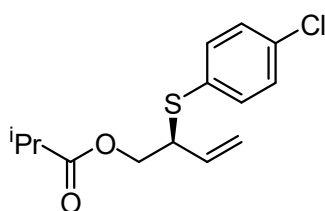

**(S)-2-((4-chlorophenyl)thio)but-3-en-1-yl isobutyrate (3s):** yield (45.4 mg, 80%); colorless oil;  $[\alpha]^{15}_D = +8.9$  ( $c$  2.39,  $\text{CH}_2\text{Cl}_2$ ); The product was analyzed by HPLC to determine the enantiomeric excess: 87% ee (Chiralpak OJ-H, *i*-propanol/hexane = 2/98, flow rate 0.5 mL/min,  $\lambda = 250$  nm);  $t_r = 12.93$  and 13.57 min.

**$^1\text{H}$  NMR (400 MHz,  $\text{CDCl}_3$ )**  $\delta$  7.35 – 7.24 (m, 2H), 7.22 – 7.17 (m, 2H), 5.65 (ddd,  $J = 17.0, 10.3, 8.4$  Hz, 1H), 5.09 – 4.96 (m, 2H), 4.22 – 4.07 (m, 2H), 3.84 – 3.72 (m, 1H), 2.46 (p,  $J = 7.0$  Hz, 1H), 1.08 (d,  $J = 7.0$  Hz, 6H).

**$^{13}\text{C}$  NMR (101 MHz,  $\text{CDCl}_3$ )**  $\delta$  176.7, 134.5, 134.4, 133.9, 131.6, 129.0, 118.2, 64.8, 50.4, 33.9, 18.9.

**HRMS (ESI+)** Calcd. For  $\text{C}_{14}\text{H}_{17}\text{ClO}_2\text{SNa}^+$  ( $[\text{M}+\text{Na}]^+$ ): 307.0530, found: 307.0532.

### HPLC chromatogram of compound 3s

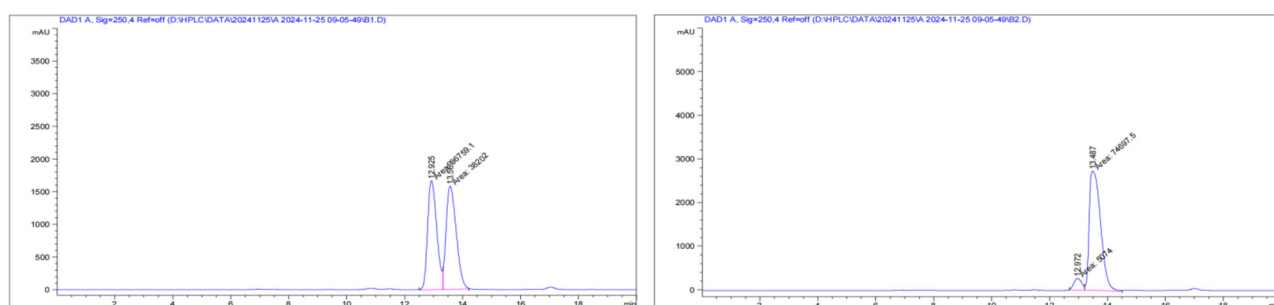



| Peak # | RetTime [min] | Type | Width [min] | Area [mAU*s] | Height [mAU] | Area %  | Peak # | RetTime [min] | Type | Width [min] | Area [mAU*s] | Height [mAU] | Area %  |
|--------|---------------|------|-------------|--------------|--------------|---------|--------|---------------|------|-------------|--------------|--------------|---------|
| 1      | 12.925        | MF   | 0.3671      | 3.67591e4    | 1669.07141   | 49.0376 | 1      | 12.972        | MF   | 0.3144      | 5074.00391   | 268.96637    | 6.3607  |
| 2      | 13.569        | FM   | 0.4031      | 3.82020e4    | 1579.51050   | 50.9624 | 2      | 13.487        | FM   | 0.4553      | 7.46975e4    | 2734.43652   | 93.6393 |

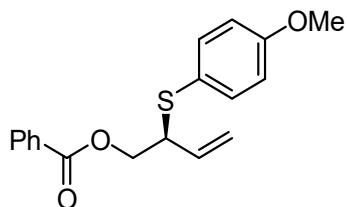

**(S)-2-((4-methoxyphenyl)thio)but-3-en-1-yl benzoate (3t):** yield (45.2 mg, 72%); colorless oil;  $[\alpha]_D^{15} = +1.2$  ( $c$  1.17,  $\text{CH}_2\text{Cl}_2$ ); The product was analyzed by HPLC to determine the enantiomeric excess: 89% ee (Chiralpak OJ-H, *i*-propanol/hexane = 2/98, flow rate 1 mL/min,  $\lambda = 254$  nm);  $t_r = 18.32$  and 25.63 min.

**$^1\text{H}$  NMR (400 MHz,  $\text{CDCl}_3$ )**  $\delta$  8.06 – 7.98 (m, 2H), 7.60 – 7.51 (m, 1H), 7.50 – 7.37 (m, 4H), 6.89 – 6.79 (m, 2H), 5.84 (ddd,  $J = 17.0, 10.4, 8.4$  Hz, 1H), 5.17 – 5.05 (m, 2H), 4.52 – 4.38 (m, 2H), 3.93 – 3.83 (m, 1H), 3.79 (s, 3H).

**$^{13}\text{C}$  NMR (101 MHz,  $\text{CDCl}_3$ )**  $\delta$  166.2, 159.9, 136.5, 134.9, 133.0, 129.9, 129.6, 128.3, 122.8, 117.7, 114.5, 65.7, 55.2, 51.0.

**HRMS (ESI<sup>+</sup>)** Calcd. For  $\text{C}_{18}\text{H}_{18}\text{O}_3\text{SNa}^+$  ( $[\text{M}+\text{Na}]^+$ ): 337.0869, found: 337.0878.

### HPLC chromatogram of compound 3t

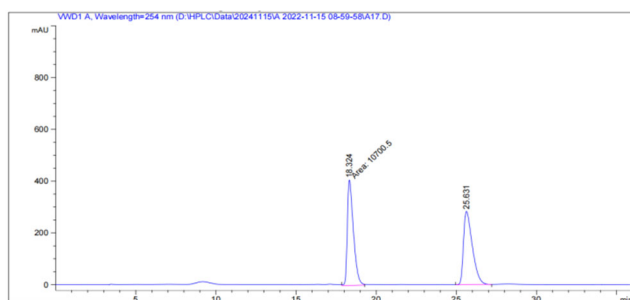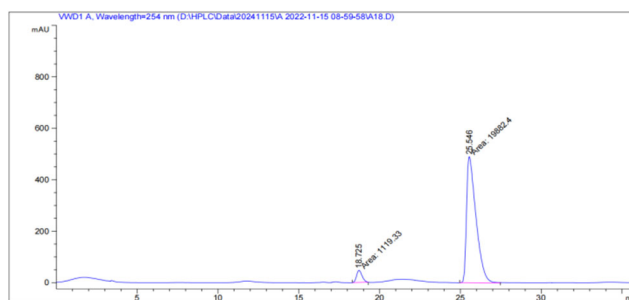

| Peak # | RetTime [min] | Type | Width [min] | Area [mAU*s] | Height [mAU] | Area %  | Peak # | RetTime [min] | Type | Width [min] | Area [mAU*s] | Height [mAU] | Area %  |
|--------|---------------|------|-------------|--------------|--------------|---------|--------|---------------|------|-------------|--------------|--------------|---------|
| 1      | 18.324        | MM   | 0.4381      | 1.07005e4    | 407.04385    | 49.6900 | 1      | 18.725        | MM   | 0.3961      | 1119.33130   | 47.10273     | 5.3297  |
| 2      | 25.631        | BB   | 0.5794      | 1.08340e4    | 283.15814    | 50.3100 | 2      | 25.546        | MM   | 0.6762      | 1.98824e4    | 490.07321    | 94.6703 |

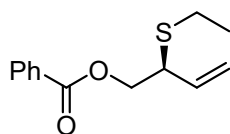



**(S)-2-(ethylthio)but-3-en-1-yl benzoate (3u):** yield (33 mg, 68%); colorless oil;  $[\alpha]_D^{15} = -2.8$  (*c* 1.50, CH<sub>2</sub>Cl<sub>2</sub>); The product was analyzed by GC to determine the enantiomeric excess: >99% ee (Beta DEX-390, N<sub>2</sub> flow rate 1.0 mL/min, 80 min at 150 °C); *t<sub>r</sub>* = 69.62 and 70.71 min.

**<sup>1</sup>H NMR (400 MHz, CDCl<sub>3</sub>)** δ 8.09 – 7.99 (m, 2H), 7.62 – 7.51 (m, 1H), 7.50 – 7.39 (m, 2H), 5.79 (ddd, *J* = 17.0, 10.2, 8.7 Hz, 1H), 5.27 – 5.14 (m, 2H), 4.50 (dd, *J* = 11.1, 5.8 Hz, 1H), 4.40 (dd, *J* = 11.1, 7.8 Hz, 1H), 3.72 – 3.62 (m, 1H), 2.58 (q, *J* = 7.4 Hz, 2H), 1.27 (t, *J* = 6.4 Hz, 3H).

**<sup>13</sup>C NMR (101 MHz, CDCl<sub>3</sub>)** δ 166.2, 135.6, 133.0, 130.0, 129.7, 128.4, 117.2, 66.0, 46.7, 24.5, 14.7.

**HRMS (ESI+)** Calcd. For C<sub>13</sub>H<sub>12</sub>O<sub>2</sub>SN<sup>+</sup> ([M+Na]<sup>+</sup>): 259.0763, found: 259.0774.

### GC chromatogram of compound 3u

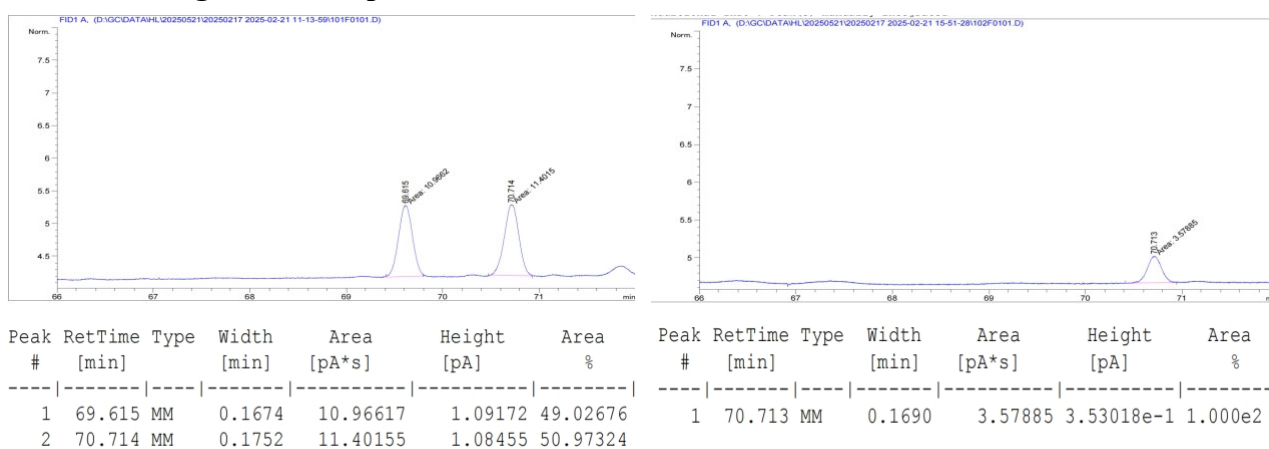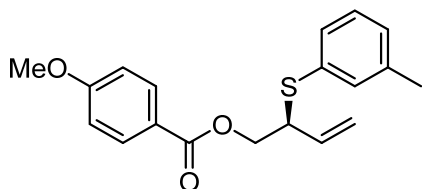

**(S)-2-(m-tolylthio)but-3-en-1-yl 4-methoxybenzoate (3v):** yield (35.4 mg, 54%); colorless oil;  $[\alpha]_D^{15} = +11.0$  (*c* 0.20, CH<sub>2</sub>Cl<sub>2</sub>); The product was analyzed by HPLC to determine the enantiomeric excess: 91% ee (Chiralpak OJ-H, *i*-propanol/hexane = 2/98, flow rate 1 mL/min, λ = 254 nm); *t<sub>r</sub>* = 17.26 and 24.92 min.

**<sup>1</sup>H NMR (400 MHz, CDCl<sub>3</sub>)** δ 8.01 – 7.90 (m, 2H), 7.32 – 7.25 (m, 2H), 7.24 – 7.14 (m, 1H), 7.10 – 7.03 (m, 1H), 6.97 – 6.86 (m, 2H), 5.86 (ddd, *J* = 17.1, 10.3, 8.2 Hz, 1H), 5.24 – 5.12 (m, 2H), 4.58 – 4.37 (m, 2H), 4.09 – 3.98 (m, 1H), 3.86 (s, 3H), 2.32 (s, 3H).

**<sup>13</sup>C NMR (101 MHz, CDCl<sub>3</sub>)** δ 165.9, 163.4, 138.7, 134.9, 133.6, 132.9, 131.7, 129.9, 128.7, 128.4, 122.3, 117.9, 113.6, 65.7, 55.4, 50.1, 21.2.

**HRMS (ESI+)** Calcd. For C<sub>19</sub>H<sub>20</sub>O<sub>3</sub>SNa<sup>+</sup> ([M+Na]<sup>+</sup>): 351.1025, found: 351.1018.

#### HPLC chromatogram of compound 3v

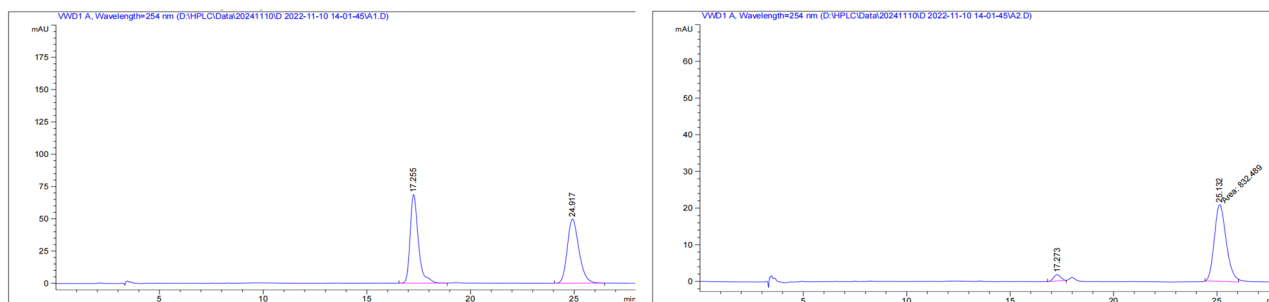

| Peak # | RetTime [min] | Type | Width [min] | Area [mAU*s] | Height [mAU] | Area %  | Peak # | RetTime [min] | Type | Width [min] | Area [mAU*s] | Height [mAU] | Area %  |
|--------|---------------|------|-------------|--------------|--------------|---------|--------|---------------|------|-------------|--------------|--------------|---------|
| 1      | 17.255        | BB   | 0.4140      | 1882.38403   | 68.62749     | 49.2953 | 1      | 17.273        | BB   | 0.3649      | 40.37965     | 1.70767      | 4.6261  |
| 2      | 24.917        | BB   | 0.5943      | 1936.20618   | 49.72767     | 50.7047 | 2      | 25.132        | MM   | 0.6634      | 832.48859    | 20.91449     | 95.3739 |

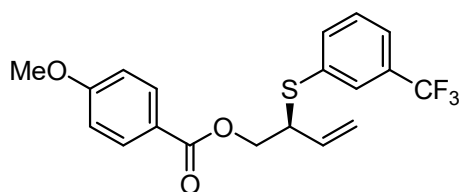

**(S)-2-((3-(trifluoromethyl)phenyl)thio)but-3-en-1-yl 4-methoxybenzoate (3w):** yield (39.7mg, 58%); colorless oil;  $[\alpha]_D^{15} = -10.1$  (*c* 1.32, CH<sub>2</sub>Cl<sub>2</sub>); The product was analyzed by HPLC to determine the enantiomeric excess: 92% ee (Chiralpak OJ-H, *i*-propanol/hexane = 2/98, flow rate 1 mL/min,  $\lambda$  = 254 nm);  $t_r$  = 15.46 and 16.72 min.

**<sup>1</sup>H NMR (400 MHz, CDCl<sub>3</sub>)**  $\delta$  7.99 – 7.90 (m, 2H), 7.70 (d, *J* = 1.8 Hz, 1H), 7.63 (d, *J* = 7.6 Hz, 1H), 7.49 (d, *J* = 7.8 Hz, 1H), 7.42 (d, *J* = 7.8 Hz, 1H), 6.97 – 6.87 (m, 2H), 5.85 (ddd, *J* = 17.2, 10.1, 8.3 Hz, 1H), 5.23 – 5.14 (m, 2H), 4.58 – 4.41 (m, 2H), 4.16 – 4.06 (m, 1H), 3.86 (s, 3H).

**<sup>13</sup>C NMR (101 MHz, CDCl<sub>3</sub>)**  $\delta$  165.9, 163.6, 135.5, 135.1, 134.3, 131.7, 131.3 (q, *J* = 20.2 Hz), 129.3, 129.0 (q, *J* = 3.8 Hz), 123.7 (q, *J* = 272.7 Hz), 124.1 (q, *J* = 3.7 Hz), 122.1, 118.6, 113.7, 65.5, 55.4, 50.3.

**<sup>19</sup>F NMR (377 MHz, CDCl<sub>3</sub>)**  $\delta$  -62.8.

**HRMS (ESI+)** Calcd. For C<sub>19</sub>H<sub>17</sub>F<sub>3</sub>O<sub>3</sub>SNa<sup>+</sup> ([M+Na]<sup>+</sup>): 405.0743, found: 405.0738.

#### HPLC chromatogram of compound 3w

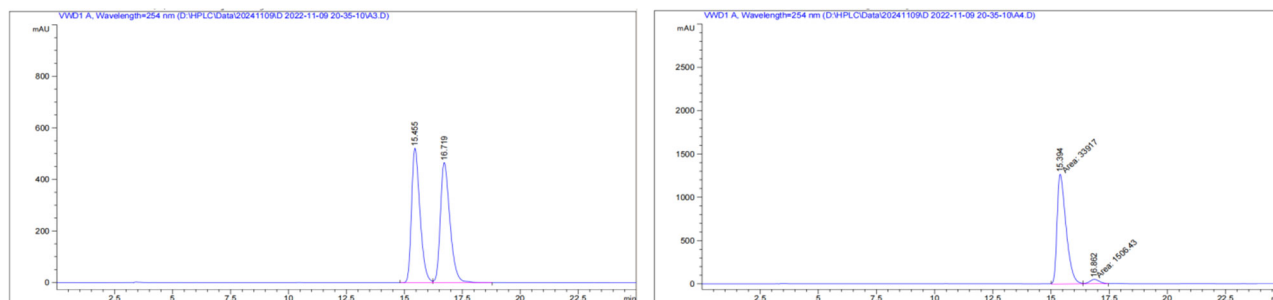

| Peak # | RetTime [min] | Type | Width [min] | Area [mAU*s] | Height [mAU] | Area %  | Peak # | RetTime [min] | Type | Width [min] | Area [mAU*s] | Height [mAU] | Area %  |
|--------|---------------|------|-------------|--------------|--------------|---------|--------|---------------|------|-------------|--------------|--------------|---------|
| 1      | 15.455        | BV   | 0.3864      | 1.32085e4    | 521.71149    | 49.6741 | 1      | 15.394        | MF   | 0.4460      | 3.39170e4    | 1267.43433   | 95.7474 |
| 2      | 16.719        | VB   | 0.4360      | 1.33818e4    | 466.03995    | 50.3259 | 2      | 16.862        | FM   | 0.4920      | 1506.42871   | 51.02662     | 4.2526  |

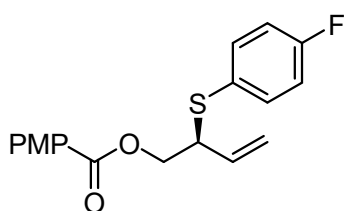

**(S)-2-((4-fluorophenyl)thio)but-3-en-1-yl 4-methoxybenzoate (3x):** yield (45.2 mg, 68%); colorless oil;  $[\alpha]_D^{15} = +11.9$  ( $c$  0.60,  $\text{CH}_2\text{Cl}_2$ ); The product was analyzed by HPLC to determine the enantiomeric excess: 94% ee (Chiralpak OJ-H, *i*-propanol/hexane = 2/98, flow rate 1.0 mL/min,  $\lambda = 254$  nm);  $t_r = 25.23$  and 33.48 min.

**$^1\text{H}$  NMR (400 MHz,  $\text{CDCl}_3$ )**  $\delta$  8.00 – 7.91 (m, 2H), 7.52 – 7.42 (m, 2H), 7.05 – 6.95 (m, 2H), 6.95 – 6.87 (m, 2H), 5.82 (ddd,  $J = 17.0, 8.3, 1.7$  Hz, 1H), 5.18 – 5.06 (m, 2H), 4.51 – 4.36 (m, 2H), 3.99 – 3.90 (m, 1H), 3.86 (s, 1H).

**$^{13}\text{C}$  NMR (101 MHz,  $\text{CDCl}_3$ )**  $\delta$  165.9, 163.5, 162.8(d,  $J = 252.5$  Hz), 136.2 (d,  $J = 8.4$  Hz), 134.7, 131.7, 127.9(d,  $J = 3$  Hz), 122.2, 118.1, 116.0 (d,  $J = 21.8$  Hz), 113.6, 65.4, 55.4, 51.0.

**$^{19}\text{F}$  NMR (377 MHz,  $\text{CDCl}_3$ )**  $\delta$  -113.2.

**HRMS (ESI+)** Calcd. For  $\text{C}_{18}\text{H}_{17}\text{FO}_3\text{SNa}^+$  ( $[\text{M}+\text{Na}]^+$ ): 355.0775, found: 355.0777.

### HPLC chromatogram of compound 3x

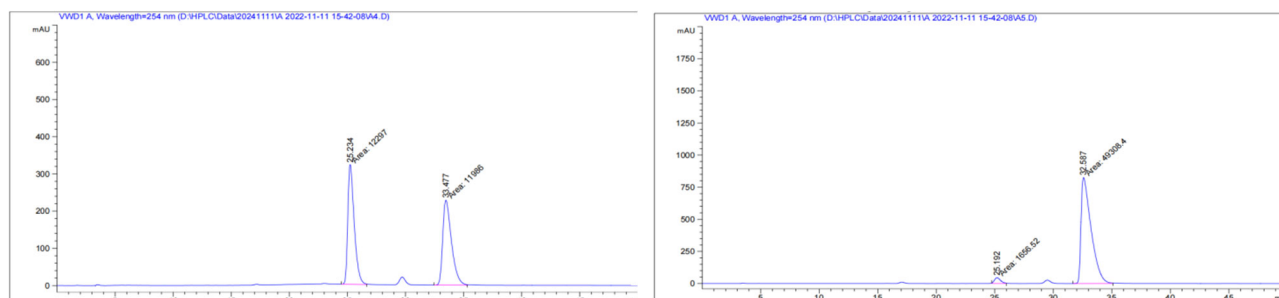

| Peak # | RetTime [min] | Type | Width [min] | Area [mAU*s] | Height [mAU] | Area %  | Peak # | RetTime [min] | Type | Width [min] | Area [mAU*s] | Height [mAU] | Area %  |
|--------|---------------|------|-------------|--------------|--------------|---------|--------|---------------|------|-------------|--------------|--------------|---------|
| 1      | 25.234        | MF   | 0.6366      | 1.22970e4    | 321.93414    | 50.6402 | 1      | 25.192        | FM   | 0.6060      | 1656.52222   | 45.55738     | 3.2503  |
| 2      | 33.477        | MF   | 0.8739      | 1.19860e4    | 228.58730    | 49.3598 | 2      | 32.587        | MF   | 0.9958      | 4.93084e4    | 825.24530    | 96.7497 |

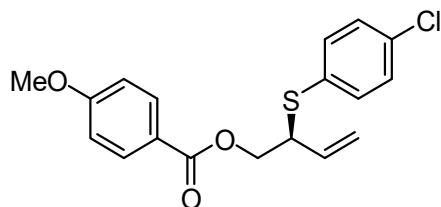

**(S)-2-((4-chlorophenyl)thio)but-3-en-1-yl 4-methoxybenzoate (3y):** yield (42.5 mg, 61%); colorless oil;  $[\alpha]_D^{25} = +22.6$  ( $c$  2.84,  $\text{CH}_2\text{Cl}_2$ ); The product was analyzed by HPLC to determine the enantiomeric excess: 90% ee (Chiralpak OJ-H, *i*-propanol/hexane = 2/98, flow rate 1 mL/min,  $\lambda$  = 254 nm);  $t_r$  = 24.72 and 37.45 min.

**$^1\text{H}$  NMR (400 MHz,  $\text{CDCl}_3$ )**  $\delta$  7.98 – 7.88 (m, 2H), 7.43 – 7.35 (m, 2H), 7.31 – 7.22 (m, 2H), 6.96 – 6.86 (m, 2H), 5.83 (ddd,  $J$  = 17.3, 10.1, 8.3 Hz, 1H), 5.21 – 5.11 (m, 2H), 4.51 – 4.37 (m, 2H), 4.06 – 3.96 (m, 1H), 3.85 (s, 3H).

**$^{13}\text{C}$  NMR (101 MHz,  $\text{CDCl}_3$ )**  $\delta$  165.9, 163.5, 134.5, 134.4, 133.9, 131.7, 131.7, 129.1, 122.1, 118.3, 113.6, 65.5, 55.4, 50.5.

**HRMS (ESI+)** Calcd. For  $\text{C}_{18}\text{H}_{17}\text{ClO}_3\text{SNa}^+$  ( $[\text{M}+\text{Na}]^+$ ): 371.0479, found: 371.0488.

### HPLC chromatogram of compound 3y

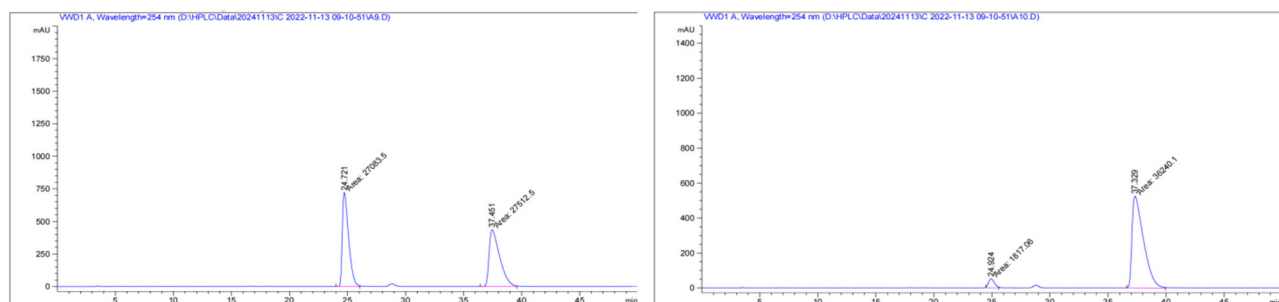

| Peak # | RetTime [min] | Type | Width [min] | Area [mAU*s] | Height [mAU] | Area %  | Peak # | RetTime [min] | Type | Width [min] | Area [mAU*s] | Height [mAU] | Area %  |
|--------|---------------|------|-------------|--------------|--------------|---------|--------|---------------|------|-------------|--------------|--------------|---------|
| 1      | 24.721        | MF   | 0.6255      | 2.70835e4    | 721.65460    | 49.6072 | 1      | 24.924        | FM   | 0.5775      | 1817.06287   | 52.43667     | 4.7746  |
| 2      | 37.451        | MF   | 1.0532      | 2.75125e4    | 435.38403    | 50.3928 | 2      | 37.329        | MM   | 1.1503      | 3.62401e4    | 525.06512    | 95.2254 |

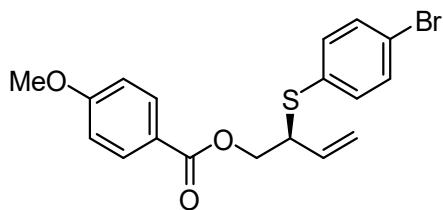

**(S)-2-((4-bromophenyl)thio)but-3-en-1-yl 4-methoxybenzoate (3z):** yield (50.2 mg, 64%); colorless oil;  $[\alpha]_D^{15} = +18.1$  ( $c$  0.40,  $\text{CH}_2\text{Cl}_2$ ); The product was analyzed by HPLC to determine the enantiomeric excess: 91% ee (Chiralpak OJ-H, *i*-propanol/hexane = 2/98, flow rate 1 mL/min,  $\lambda = 254$  nm);  $t_r = 30.46$  and 51.36 min.

**$^1\text{H}$  NMR (400 MHz,  $\text{CDCl}_3$ )**  $\delta$  7.97 – 7.88 (m, 2H), 7.46 – 7.37 (m, 2H), 7.36 – 7.29 (m, 2H), 6.97 – 6.87 (m, 2H), 5.83 (ddd,  $J = 17.2, 10.1, 8.2$  Hz, 1H), 5.22 – 5.12 (m, 2H), 4.51 – 4.38 (m, 2H), 4.07 – 3.97 (m, 1H), 3.86 (s, 3H).

**$^{13}\text{C}$  NMR (101 MHz,  $\text{CDCl}_3$ )**  $\delta$  165.9, 163.5, 134.6, 134.5, 132.5, 132.0, 131.7, 122.1, 121.9, 118.4, 113.6, 65.6, 55.4, 50.4.

**HRMS (ESI+)** Calcd. For  $\text{C}_{18}\text{H}_{17}\text{BrO}_3\text{SNa}^+$  ( $[\text{M}+\text{Na}]^+$ ): 414.9974, found: 414.9972.

#### HPLC chromatogram of compound 3z

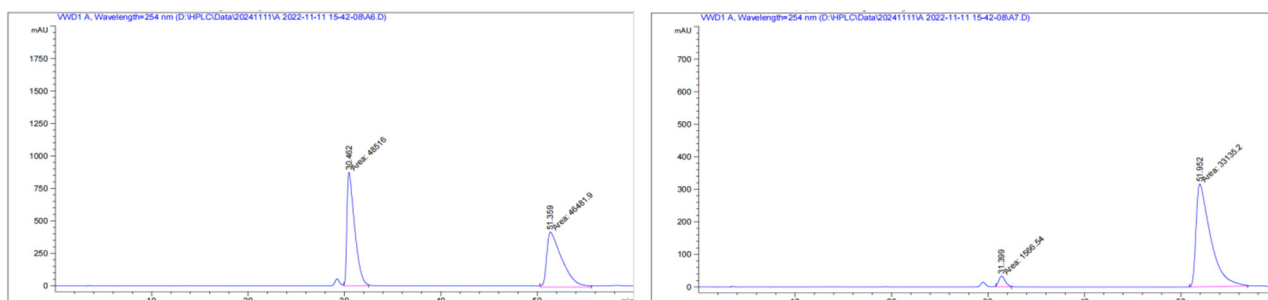

| Peak # | RetTime [min] | Type | Width [min] | Area [mAU*s] | Height [mAU] | Area %  | Peak # | RetTime [min] | Type | Width [min] | Area [mAU*s] | Height [mAU] | Area %  |
|--------|---------------|------|-------------|--------------|--------------|---------|--------|---------------|------|-------------|--------------|--------------|---------|
| 1      | 30.462        | MF   | 0.9244      | 4.85160e4    | 874.77277    | 51.0706 | 1      | 31.399        | FM   | 0.7894      | 1566.54163   | 33.07469     | 4.5143  |
| 2      | 51.359        | MM   | 1.8306      | 4.64819e4    | 423.18808    | 48.9294 | 2      | 51.952        | MM   | 1.7477      | 3.31352e4    | 315.99356    | 95.4857 |

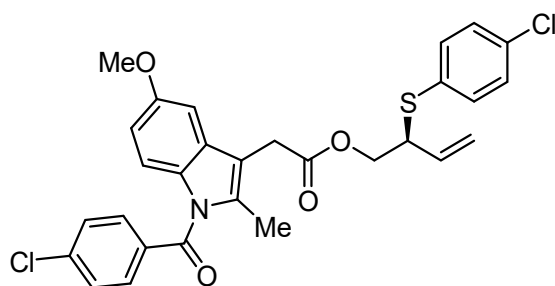

**(S)-2-((4-chlorophenyl)thio)but-3-en-1-yl**

**2-(1-(4-chlorobenzoyl)-5-methoxy-2-methyl-1H-**

**indol-3-yl)acetate (3A):** yield (55.3 mg, 50%); white solid (m.p. 90 °C);  $[\alpha]^{15}_D = +2.9$  (*c* 1.42, CH<sub>2</sub>Cl<sub>2</sub>); The product was analyzed by HPLC to determine the enantiomeric excess: 97% ee (Chiralpak IA, *i*-propanol/hexane = 3/97, flow rate 1 mL/min,  $\lambda = 254$  nm);  $t_r = 56.69$  and 62.90 min.

**<sup>1</sup>H NMR (400 MHz, CDCl<sub>3</sub>)**  $\delta$  7.69 – 7.61 (m, 2H), 7.50 – 7.40 (m, 2H), 7.32 – 7.19 (m, 4H), 6.96 (d, *J* = 2.6 Hz, 1H), 6.87 (d, *J* = 9.0 Hz, 1H), 6.67 (dd, *J* = 9.0, 2.5 Hz, 1H), 5.67 (ddd, *J* = 17.0, 10.3, 8.4 Hz, 1H), 5.07 – 4.94 (m, 2H), 4.24 (dd, *J* = 6.7, 0.8 Hz, 2H), 3.83 (s, 3H), 3.67 (s, 2H), 2.38 (s, 3H).

**<sup>13</sup>C NMR (101 MHz, CDCl<sub>3</sub>)**  $\delta$  170.4, 168.2, 156.0, 139.2, 136.0, 134.6, 134.2, 134.0, 133.8, 131.2, 131.1, 130.8, 130.5, 129.1, 118.2, 114.9, 112.2, 111.6, 101.4, 65.4, 55.7, 50.4, 30.2, 13.3.

**HRMS (ESI+)** Calcd. For C<sub>29</sub>H<sub>25</sub>Cl<sub>2</sub>NO<sub>4</sub>SN<sup>+</sup> ( $[M+Na]^+$ ): 576.0774, found: 576.0780.

### HPLC chromatogram of compound 3A

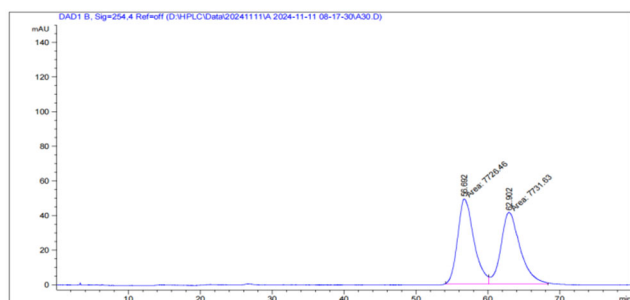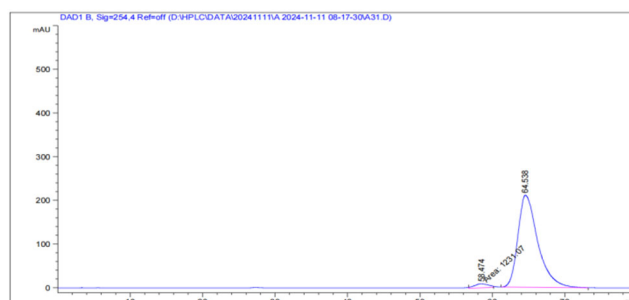

| Peak # | RetTime [min] | Type | Width [min] | Area [mAU*s] | Height [mAU] | Area %  | Peak # | RetTime [min] | Type | Width [min] | Area [mAU*s] | Height [mAU] | Area %  |
|--------|---------------|------|-------------|--------------|--------------|---------|--------|---------------|------|-------------|--------------|--------------|---------|
| 1      | 56.692        | MF   | 2.6188      | 7726.46387   | 49.17360     | 49.9833 | 1      | 58.474        | MM   | 2.2773      | 1231.07300   | 9.00971      | 2.9615  |
| 2      | 62.902        | FM   | 3.1100      | 7731.63037   | 41.43445     | 50.0167 | 2      | 64.538        | BB   | 2.2610      | 4.03382e4    | 210.94702    | 97.0385 |

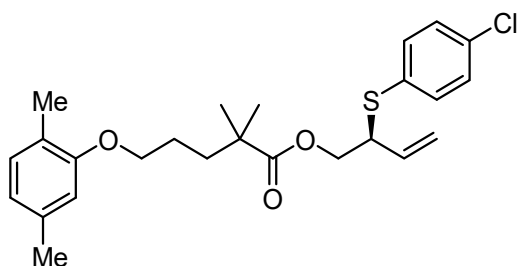

**(S)-2-((4-chlorophenyl)thio)but-3-en-1-yl 5-(2,5-dimethylphenoxy)-2,2-dimethylpentanoate (3B):** yield (28.4 mg, 33%); colorless oil;  $[\alpha]^{15}_D = +1.1$  (*c* 0.3, CH<sub>2</sub>Cl<sub>2</sub>); The product was analyzed by HPLC to determine the enantiomeric excess: 89% ee (Chiralpak OD-H, *i*-propanol/hexane = 2/98, flow rate 1 mL/min,  $\lambda = 254$  nm);  $t_r = 7.86$  and 8.86 min.

**<sup>1</sup>H NMR (400 MHz, CDCl<sub>3</sub>)**  $\delta$  7.40 – 7.32 (m, 2H), 7.31 – 7.21 (m, 1H), 7.00 (d, *J* = 7.4 Hz, 1H),

6.66 (d,  $J = 7.5$  Hz, 1H), 6.60 (s, 1H), 5.73 (ddd,  $J = 17.0, 10.3, 8.4$  Hz, 1H), 5.15 – 5.03 (m, 2H), 4.29 – 4.15 (m, 2H), 3.94 – 3.81 (m, 3H), 2.30 (s, 3H), 2.17 (s, 3H), 1.75–1.71 (m, 4H), 1.22 (s, 6H).  $^{13}\text{C}$  NMR (101 MHz,  $\text{CDCl}_3$ )  $\delta$  177.4, 156.9, 136.4, 134.6, 134.4, 133.9, 131.6, 130.3, 129.1, 123.5, 120.7, 118.2, 111.9, 67.9, 64.9, 50.5, 42.2, 36.9, 29.7, 25.2, 25.1, 21.4, 15.8.

HRMS (ESI+) Calcd. For  $\text{C}_{25}\text{H}_{35}\text{ClO}_3\text{S}^+$  ( $[\text{M}+\text{NH}_4]^+$ ): 464.2021, found: 464.2014.

#### HPLC chromatogram of compound 3B

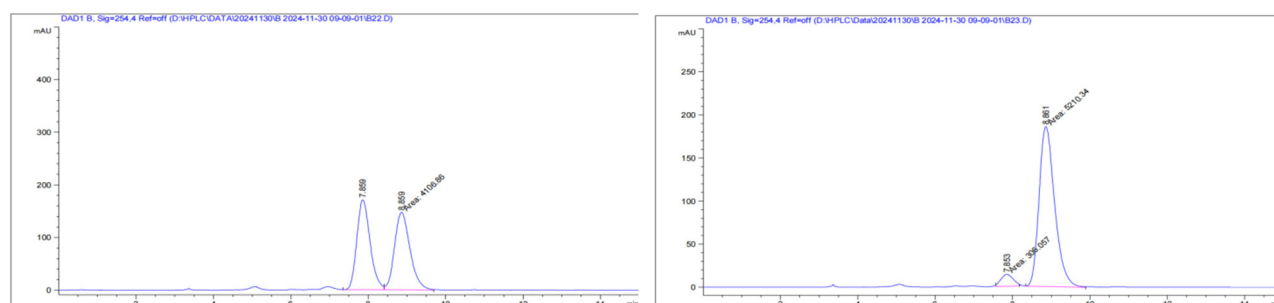

| Peak # | RetTime [min] | Type | Width [min] | Area [mAU*s] | Height [mAU] | Area %  | Peak # | RetTime [min] | Type | Width [min] | Area [mAU*s] | Height [mAU] | Area %  |
|--------|---------------|------|-------------|--------------|--------------|---------|--------|---------------|------|-------------|--------------|--------------|---------|
| 1      | 7.859         | VV   | 0.3685      | 4082.22266   | 170.99350    | 49.8495 | 1      | 7.853         | MF   | 0.3687      | 306.05737    | 13.83628     | 5.5481  |
| 2      | 8.859         | MF   | 0.4642      | 4106.86475   | 147.44647    | 50.1505 | 2      | 8.861         | MM   | 0.4676      | 5210.34473   | 185.73134    | 94.4519 |

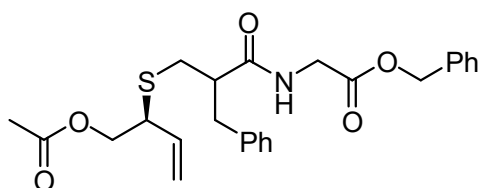

**Benzyl (3-(((*S*)-1-acetoxybut-3-en-2-yl)thio)-2-benzylpropanoyl)glycinate (3C):** yield (70 mg, 67%); colorless oil;  $[\alpha]_D^{15} = +7.3$  ( $c$  1.35,  $\text{CH}_2\text{Cl}_2$ ); The product was analyzed by HPLC to determine the enantiomeric excess: 97% ee (Chiralpak IA, *i*-propanol/hexane = 10/90, flow rate 1 mL/min,  $\lambda = 210$  nm);  $t_r = 20.27$  and 22.95 min.

$^1\text{H}$  NMR (400 MHz,  $\text{CDCl}_3$ )  $\delta$  7.41 – 7.30 (m, 5H), 7.29 – 7.24 (m, 2H), 7.23 – 7.11 (m, 3H), 6.10 – 6.03 (m, 1H), 5.61 (ddd,  $J = 17.1, 10.2, 8.7$  Hz, 1H), 5.16 (s, 2H), 5.09 – 4.87 (m, 2H), 4.23 – 4.10 (m, 2H), 4.10 – 4.04 (m, 1H), 4.01 – 3.92 (m, 1H), 3.47 – 3.36 (m, 1H), 3.03 – 2.90 (m, 1H), 2.88 – 2.77 (m, 2H), 2.64 – 2.52 (m, 2H), 2.04 (s, 3H).

$^{13}\text{C}$  NMR (101 MHz,  $\text{CDCl}_3$ )  $\delta$  173.3, 170.7, 169.5, 138.8, 135.1, 135.0, 128.9, 128.9, 128.6, 128.5, 128.3, 126.5, 117.6, 67.1, 65.3, 49.6, 47.2, 41.4, 38.2, 31.9, 20.8.

HRMS (ESI+) Calcd. For  $\text{C}_{25}\text{H}_{29}\text{NO}_5\text{SNa}^+$  ( $[\text{M}+\text{Na}]^+$ ): 478.1659, found: 478.1654.

#### HPLC chromatogram of compound 3C



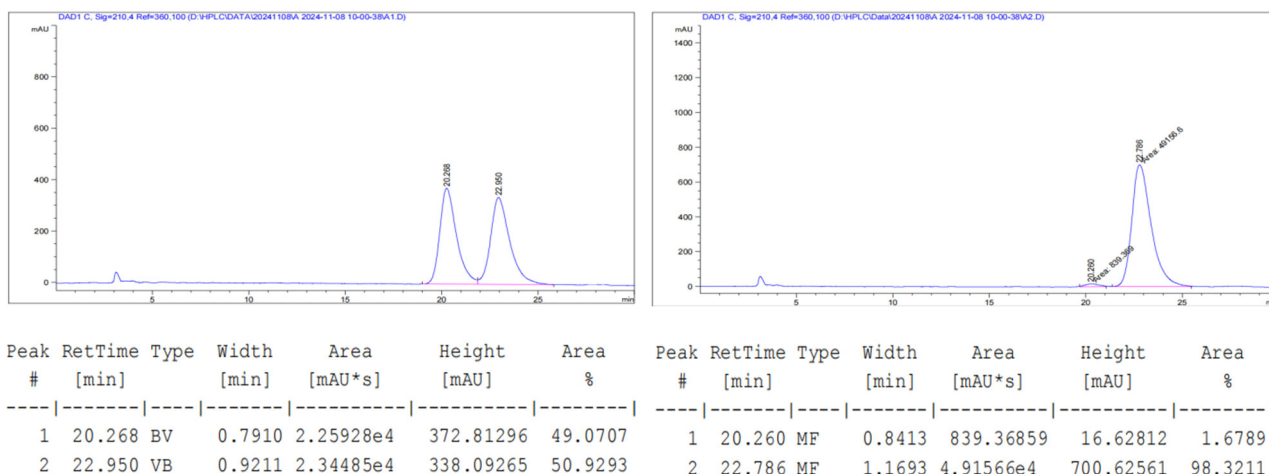

## 5. Synthetic transformation

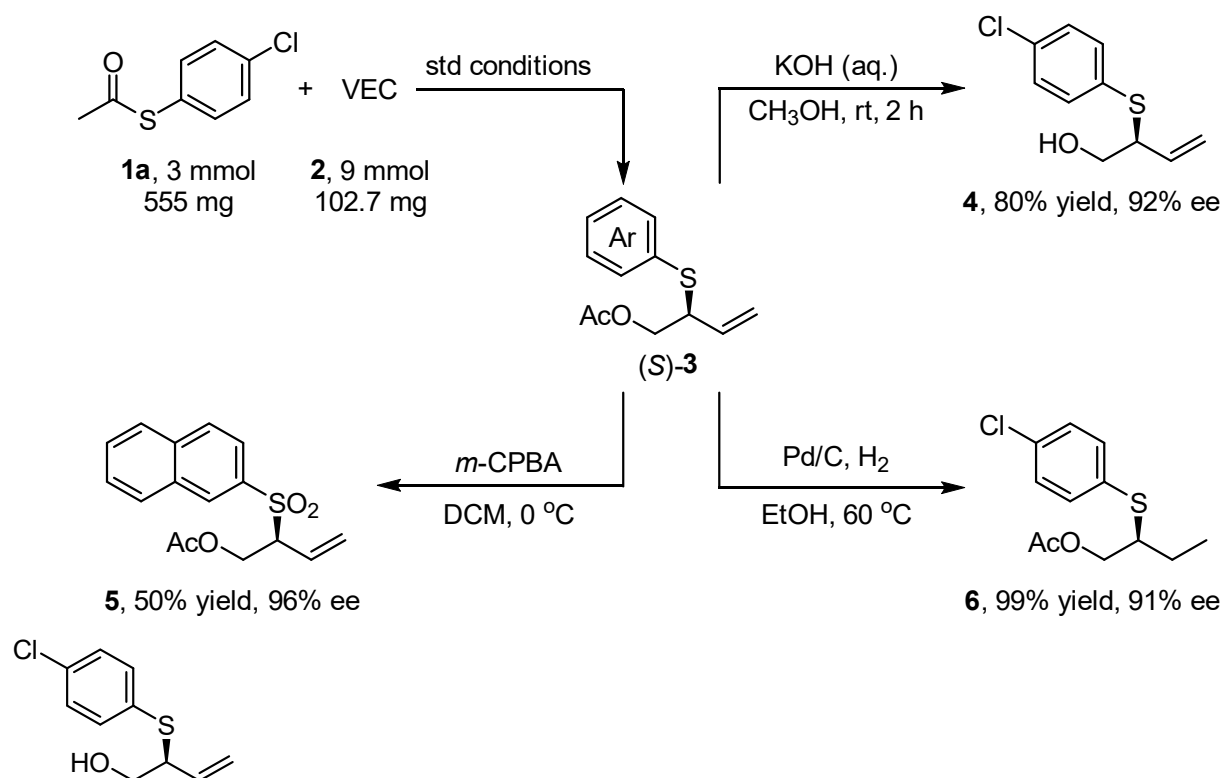

A 10 mL dried flask equipped with magnetic stirring bar. Then, (S)-**3a** (25.6 mg, 0.1 mmol) and MeOH (1.0 mL) were added, respectively. Add KOH (1 mL, aq., 1 M) to solution slowly at room temperature. The mixture was allowed to react at this temperature and stir for 2 h. After completion, the aqueous phase was extracted with ethyl acetate. the combined organic layers were washed with brine, dried by Na<sub>2</sub>SO<sub>4</sub> and concentrate in vacuo. The mixture was purified by column chromatography to give the desired product **4**.

**(S)-2-((4-chlorophenyl)thio)but-3-en-1-ol (4)**: yield (17.1 mg, 80%); colorless oil; [ $\alpha$ ]<sub>D</sub><sup>15</sup> = 20.4 (c 0.32, CH<sub>2</sub>Cl<sub>2</sub>); The product was analyzed by HPLC to determine the enantiomeric excess: 92% ee



(Chiralpak OJ-H, *i*-propanol/hexane = 2/98, flow rate 1 mL/min,  $\lambda$  = 250 nm);  $t_r$  = 44.21 and 47.54 min.

$^1\text{H}$  NMR (400 MHz,  $\text{CDCl}_3$ )  $\delta$  7.41 – 7.32 (m, 2H), 7.30 – 7.26 (m, 2H), 5.84 – 5.70 (m, 1H), 5.21 – 5.09 (m, 2H), 3.78 – 3.59 (m, 3H).

$^{13}\text{C}$  NMR (101 MHz,  $\text{CDCl}_3$ )  $\delta$  134.9, 134.6, 134.0, 131.3, 129.1, 118.5, 63.6, 54.9.

HRMS (ESI+) Calcd. For  $\text{C}_{10}\text{H}_{11}\text{ClOSNa}^+$  ( $[\text{M}+\text{Na}]^+$ ): 237.0122, found: 237.0111.

#### HPLC chromatogram of compound 4

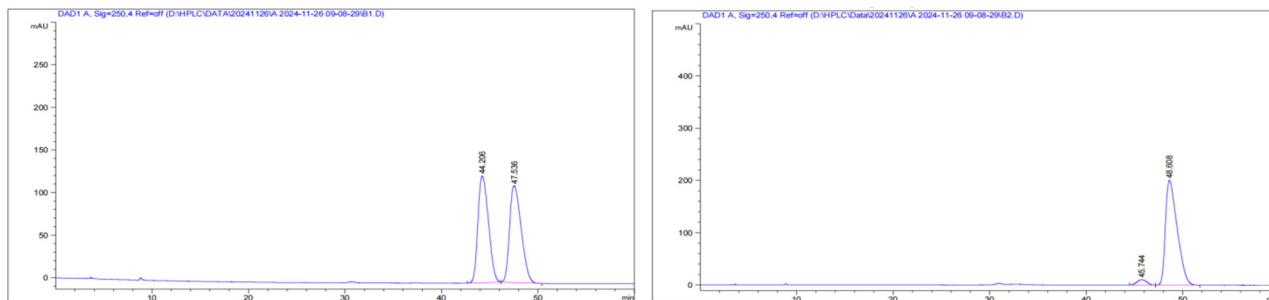

| Peak # | RetTime [min] | Type | Width [min] | Area [mAU*s] | Height [mAU] | Area %  | Peak # | RetTime [min] | Type | Width [min] | Area [mAU*s] | Height [mAU] | Area %  |
|--------|---------------|------|-------------|--------------|--------------|---------|--------|---------------|------|-------------|--------------|--------------|---------|
| 1      | 44.206        | BB   | 1.1115      | 9469.42773   | 125.32547    | 49.9682 | 1      | 45.744        | BB   | 0.8259      | 715.29138    | 10.20342     | 4.0671  |
| 2      | 47.536        | BB   | 1.2143      | 9481.48145   | 113.53406    | 50.0318 | 2      | 48.608        | BB   | 1.2102      | 1.68718e4    | 200.80637    | 95.9329 |

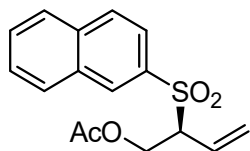

To a solution of sulfide (*S*)-**3n** (0.1 mmol) in DCM (0.5 mL) was added *m*-CPBA (45.2 mg, 0.22 mmol, 70% wt). The resulting mixture was stirred at 0°C for 20 min, then quenched with  $\text{NaHCO}_3$  (2 mL), and extracted with DCM (2 mL  $\times$  3). The combined extracts were washed with brine, dried over anhydrous  $\text{MgSO}_4$ , and concentrated in vacuo. After flash chromatography on silica gel, the desired sulfone was analyzed by HPLC to determine the ee value.

(*S*)-2-(naphthalen-2-ylsulfonyl)but-3-en-1-yl acetate (**5**): yield (15.2 mg, 50%); white solid, m.p. 60°C;  $[\alpha]_D^{15} = -13.0$  ( $c$  0.26,  $\text{CH}_2\text{Cl}_2$ ); The product was analyzed by HPLC to determine the enantiomeric excess: 96% ee (Chiralpak OD-H, *i*-propanol/hexane = 6/94, flow rate 1 mL/min,  $\lambda$  = 230 nm);  $t_r$  = 30.46 and 51.36 min.

**<sup>1</sup>H NMR (400 MHz, CDCl<sub>3</sub>)** δ 8.47 – 8.42 (m, 1H), 8.04 – 7.90 (m, 3H), 7.83 (dd, *J* = 8.7, 1.9 Hz, 1H), 7.74 – 7.55 (m, 2H), 5.79 (ddd, *J* = 17.1, 10.3, 9.0 Hz, 1H), 5.44 – 5.16 (m, 2H), 4.61 – 4.38 (m, 2H), 4.12 – 4.02 (m, 1H), 1.86 (s, 3H).

**<sup>13</sup>C NMR (101 MHz, CDCl<sub>3</sub>)** δ 170.3, 135.4, 134.7, 131.9, 131.1, 129.5, 129.2, 127.9, 127.7, 127.0, 124.9, 123.6, 68.0, 60.9, 20.5.

**HRMS (ESI+)** Calcd. For C<sub>16</sub>H<sub>16</sub>O<sub>4</sub>SN<sup>+</sup> ([M+Na]<sup>+</sup>): 327.0662, found: 327.0667.

### HPLC chromatogram of compound 5

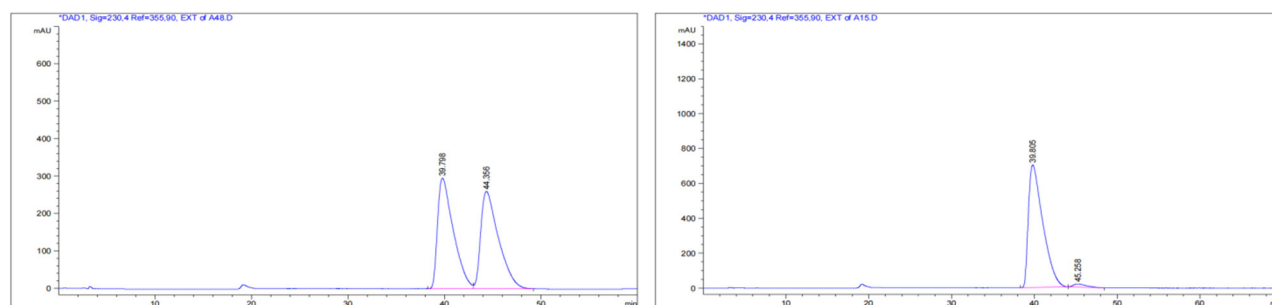

| Peak # | RetTime [min] | Type | Width [min] | Area [mAU*s] | Height [mAU] | Area %  | Peak # | RetTime [min] | Type | Width [min] | Area [mAU*s] | Height [mAU] | Area %  |
|--------|---------------|------|-------------|--------------|--------------|---------|--------|---------------|------|-------------|--------------|--------------|---------|
| 1      | 39.798        | BV   | 1.5119      | 3.36685e4    | 295.80704    | 50.2101 | 1      | 39.805        | BB   | 1.6435      | 8.50057e4    | 702.59009    | 97.7731 |
| 2      | 44.356        | VB   | 1.5393      | 3.33867e4    | 260.48270    | 49.7899 | 2      | 45.258        | BB   | 1.2654      | 1936.13892   | 17.93511     | 2.2269  |

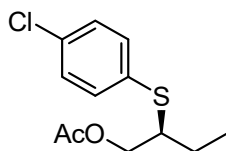

To a vial equipped with a magnetic stirring rod was added successively: Pd/C (0.1 mmol, 1 equiv.), (*S*)-**3a** (0.1 mmol, 1 equiv.), EtOH (1 mL). The vial was subsequently transferred into an autoclave and then hydrogen gas was charged. The reaction was then stirred under H<sub>2</sub> (50 atm) at 60 °C for 12 h. The hydrogen gas was released slowly and carefully. The solution was passed through a short column of silica gel to remove the metal complex. The conversion of products was determined by <sup>1</sup>H NMR analysis. The crude products were concentrated and purified by column chromatography, and the ee values were determined by HPLC on a chiral stationary phase.

**(*S*)-2-((4-chlorophenyl)thio)butyl acetate (6):** yield (25.5 mg, 99%); colorless oil; [ $\alpha$ ]<sub>D</sub><sup>15</sup> = 2.9 (*c* 1.42, CH<sub>2</sub>Cl<sub>2</sub>); The product was analyzed by HPLC to determine the enantiomeric excess: 90% ee (Chiralpak OJ-H, *i*-propanol/hexane = 2/98, flow rate 1 mL/min,  $\lambda$  = 254 nm); *t<sub>r</sub>* = 8.03 and 8.90 min.

**<sup>1</sup>H NMR (400 MHz, CDCl<sub>3</sub>)** δ 7.42 – 7.32 (m, 2H), 7.30 – 7.22 (m, 2H), 4.18 (dd, *J* = 11.4, 5.8 Hz, 1H), 4.09 (dd, *J* = 11.4, 7.2 Hz, 1H), 3.24 – 3.13 (m, 1H), 2.01 (s, 3H), 1.85 – 1.70 (m, 1H), 1.58 – 1.47 (m, 1H), 1.08 (t, *J* = 7.4 Hz, 3H).

**<sup>13</sup>C NMR (101 MHz, CDCl<sub>3</sub>)** δ 170.8, 133.5, 133.3, 132.8, 129.1, 66.2, 49.3, 24.4, 20.8, 11.3.

**HRMS (ESI+)** Calcd. For C<sub>18</sub>H<sub>17</sub>ClO<sub>3</sub>SNa<sup>+</sup> ([M+Na]<sup>+</sup>): 371.0479, found: 371.0488.

### HPLC chromatogram of compound 6

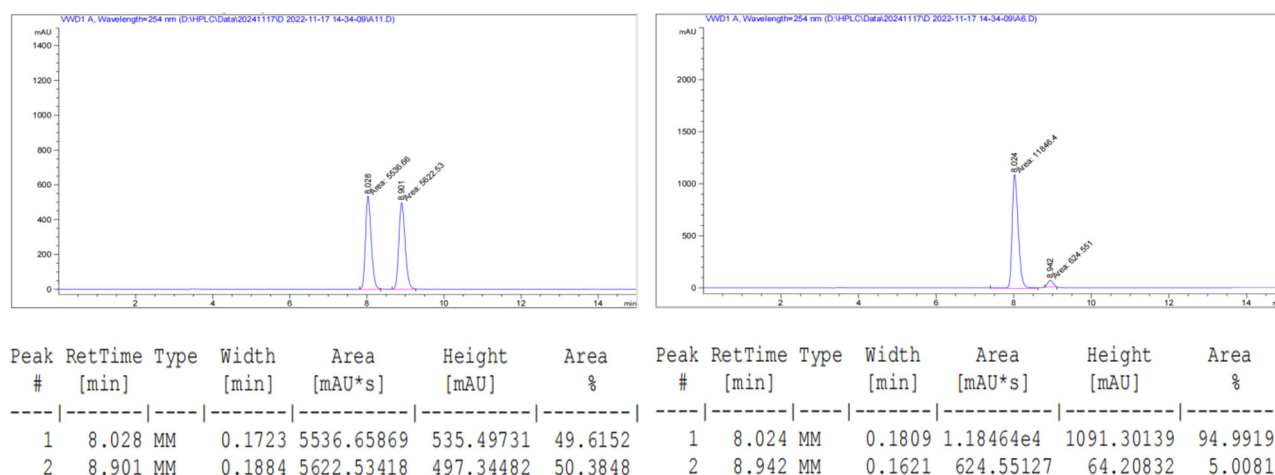

## 6. Control experiments and mechanistic investigations

### a) Investigation of kinetic resolution

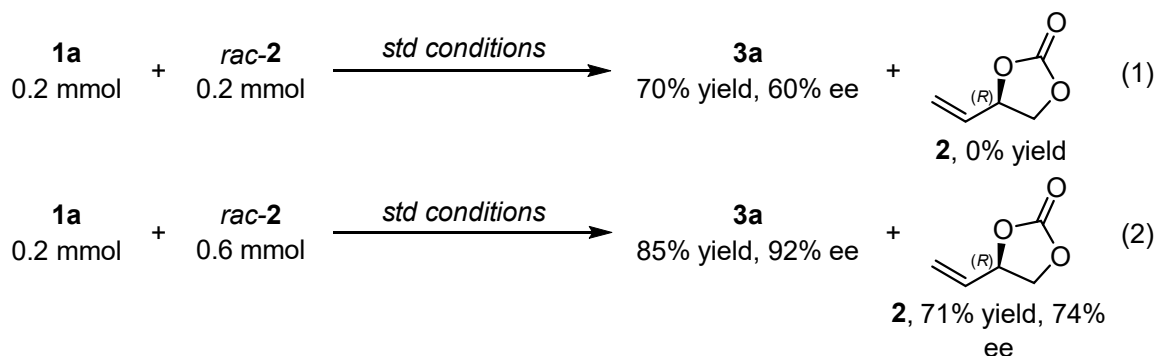

A flame dried Schlenk tube was cooled to rt, and it was then evacuated and backfilled with argon for three times. To this Schlenk tube was added (*S,S,S*)-[Ir\*]-**1** (0.01 mmol, 5 mol %), aryl thioester **1a** (0.20 mmol, 1 equiv.), *rac*-**2** (0.2 mmol, 1 equiv.) and DCE (2 mL). The reaction was stirred at 50 °C for 12 hours. Once starting material was consumed (monitored by TLC), the solvent was evaporated under reduced pressure, and the residue was purified by column chromatography to give the desired product, which was then directly analyzed by HPLC to determine the enantiomeric excess. And recovered **2** in eq. 2 was then directly analyzed by GC to determine the enantiomeric excess.

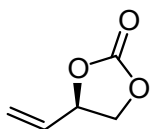

**(R)-4-vinyl-1,3-dioxolan-2-one (2):** yield (71%); colorless oil; The product was analyzed by GC to determine the enantiomeric excess: 74% ee (Beta DEX-390, N<sub>2</sub> flow rate 1.0 mL/min, 20 min at 150 °C); *t<sub>r</sub>* = 6.72 and 7.02 min.

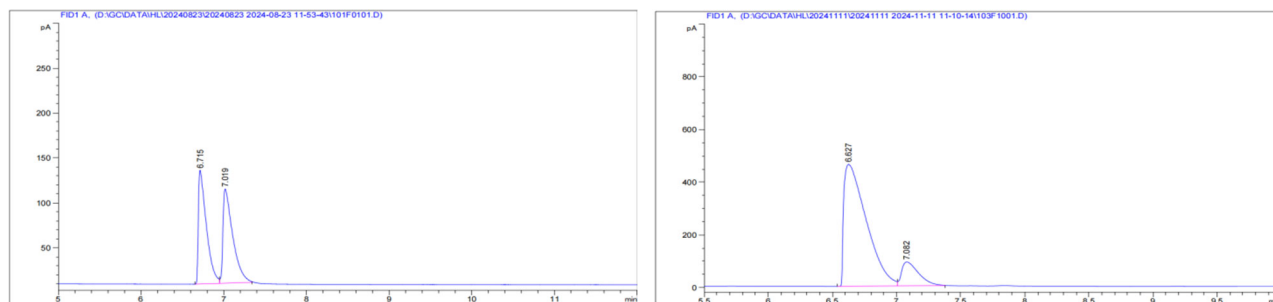

| Peak # | RetTime [min] | Type | Width [min] | Area [pA*s] | Height [pA] | Area %   | Peak # | RetTime [min] | Type | Width [min] | Area [pA*s] | Height [pA] | Area %   |
|--------|---------------|------|-------------|-------------|-------------|----------|--------|---------------|------|-------------|-------------|-------------|----------|
| 1      | 6.715         | BV   | 0.0914      | 851.26074   | 126.64633   | 49.67344 | 1      | 6.627         | BV   | 0.1671      | 5637.26318  | 462.86511   | 87.05190 |
| 2      | 7.019         | VB   | 0.1100      | 862.45337   | 104.76733   | 50.32656 | 2      | 7.082         | VB   | 0.1299      | 838.48639   | 90.69037    | 12.94810 |

#### b) Control experiments of thioalcohol as the nucleophile

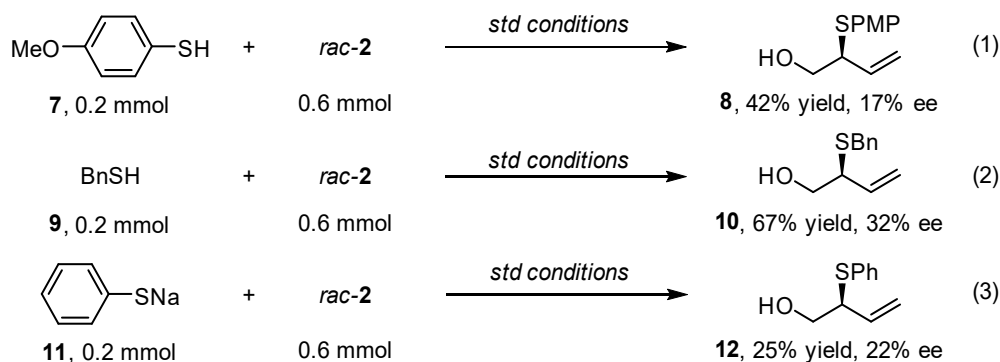

A flame dried Schlenk tube was cooled to rt, and it was then evacuated and backfilled with argon for three times. To this Schlenk tube was added (*S,S,S*)-[Ir\*]-**1** (0.02 mmol, 10 mol %), *p*-methoxythiophenol **7**, benzylmercaptan **9** or sodium thiophenolate **11** (0.20 mmol, 1.0 equiv.), VEC **2** (1.2 mmol, 3 equiv.), DABCO (0.2 mmol, 1 equiv.) and DCE (2 mL). The reaction was stirred at 50 °C for 12 hours. Once starting material was consumed (monitored by TLC), the solvent was evaporated under reduced pressure and the residue was purified by column chromatography to give **8**, **10** or **12**.

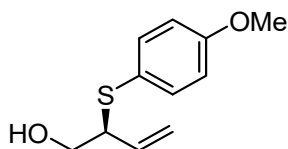

**(S)-2-((4-methoxyphenyl)thio)but-3-en-1-ol (8):** yield (17.6 mg, 42%); colorless oil;  $[\alpha]_D^{15} = +2.1$  ( $c$  1.80,  $\text{CH}_2\text{Cl}_2$ ); The product was analyzed by HPLC to determine the enantiomeric excess: 17% ee (Chiralpak AS-H, *i*-propanol/hexane = 10/90, flow rate 1 mL/min,  $\lambda = 254$  nm);  $t_r = 12.68$  and 15.77 min.

**$^1\text{H}$  NMR (400 MHz,  $\text{CDCl}_3$ )**  $\delta$  7.44 – 7.35 (m, 2H), 6.88 – 6.80 (m, 2H), 5.75 (ddd,  $J = 17.1, 10.4, 7.9$  Hz, 1H), 5.17 – 5.03 (m, 2H), 3.80 (s, 3H), 3.70 – 3.54 (m, 3H).

**$^{13}\text{C}$  NMR (101 MHz,  $\text{CDCl}_3$ )**  $\delta$  159.9, 136.5, 135.3, 122.4, 117.9, 114.5, 63.2, 55.4, 55.3.

**HRMS (ESI+)** Calcd. For  $\text{C}_{11}\text{H}_{14}\text{O}_2\text{SNa}^+$  ( $[\text{M}+\text{Na}]^+$ ): 233.0607, found: 233.0610.

#### HPLC chromatogram of compound 8

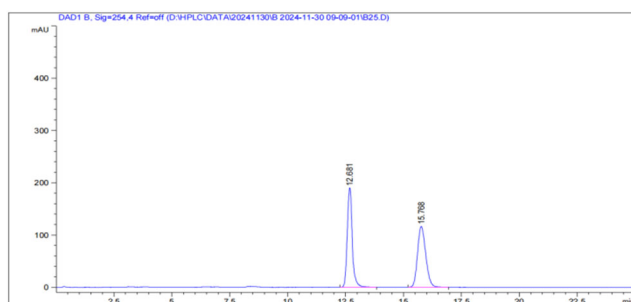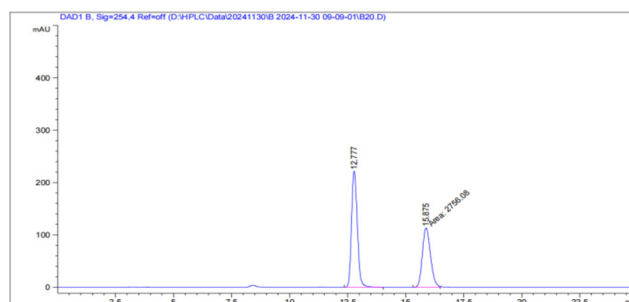

| Peak # | RetTime [min] | Type | Width [min] | Area [mAU*s] | Height [mAU] | Area %  | Peak # | RetTime [min] | Type | Width [min] | Area [mAU*s] | Height [mAU] | Area %  |
|--------|---------------|------|-------------|--------------|--------------|---------|--------|---------------|------|-------------|--------------|--------------|---------|
| 1      | 12.681        | BB   | 0.2322      | 2839.15430   | 190.19125    | 49.9367 | 1      | 12.777        | BB   | 0.2732      | 3848.20166   | 220.89803    | 58.2683 |
| 2      | 15.768        | BB   | 0.3839      | 2846.35571   | 116.13731    | 50.0633 | 2      | 15.875        | MF   | 0.4067      | 2756.08228   | 112.94962    | 41.7317 |

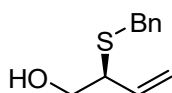

**(S)-2-(benzylthio)but-3-en-1-ol (10):** yield (26.0 mg, 67%); colorless oil;  $[\alpha]_D^{15} = +35.9$  ( $c$  1.00,  $\text{CH}_2\text{Cl}_2$ ); The product was analyzed by HPLC to determine the enantiomeric excess: 32% ee (Chiralpak AS-H, *i*-propanol/hexane = 10/90, flow rate 1 mL/min,  $\lambda = 230$  nm);  $t_r = 7.46$  and 8.37 min.

**$^1\text{H}$  NMR (400 MHz,  $\text{CDCl}_3$ )**  $\delta$  7.34 – 7.28 (m, 4H), 7.25 – 7.21 (m, 1H), 5.75 (ddd,  $J = 17.0, 10.2, 8.5$  Hz, 1H), 5.27 – 5.14 (m, 2H), 3.71 (q,  $J = 13.4$  Hz, 2H), 3.67 – 3.59 (m, 2H), 3.38 – 3.26 (m, 1H).

**<sup>13</sup>C NMR (101 MHz, CDCl<sub>3</sub>)** δ 138.0, 135.7, 128.9, 128.6, 127.1, 117.9, 63.7, 50.7, 34.5.

**HRMS (ESI+)** Calcd. For C<sub>11</sub>H<sub>14</sub>OSNa<sup>+</sup> ([M+Na]<sup>+</sup>): 217.0658, found: 217.0605.

### HPLC chromatogram of compound 10

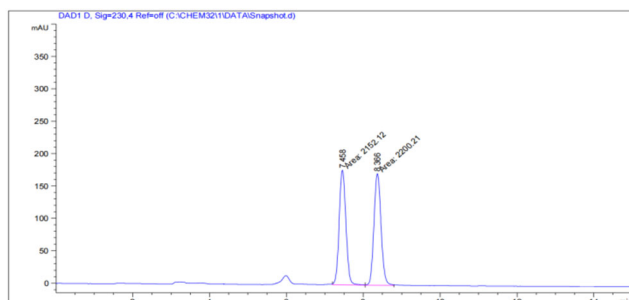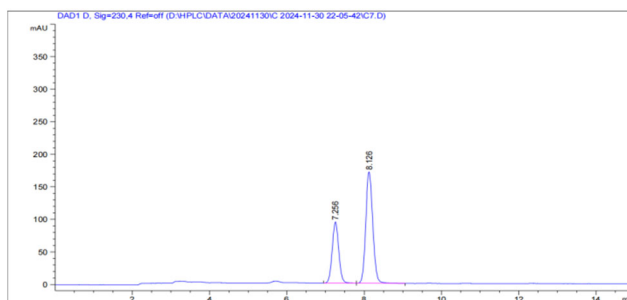

| Peak # | RetTime [min] | Type | Width [min] | Area [mAU*s] | Height [mAU] | Area %  | Peak # | RetTime [min] | Type | Width [min] | Area [mAU*s] | Height [mAU] | Area %  |
|--------|---------------|------|-------------|--------------|--------------|---------|--------|---------------|------|-------------|--------------|--------------|---------|
| 1      | 7.458         | FM   | 0.2027      | 2152.12085   | 176.96689    | 49.4476 | 1      | 7.256         | BB   | 0.1841      | 1111.64160   | 93.94337     | 34.0488 |
| 2      | 8.366         | MF   | 0.2133      | 2200.20654   | 171.93277    | 50.5524 | 2      | 8.126         | BB   | 0.1949      | 2153.20874   | 170.97652    | 65.9512 |

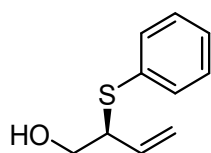

**(S)-2-(phenylthio)but-3-en-1-ol (12):** yield (9 mg, 25%); colorless oil; [α]<sub>D</sub><sup>15</sup> = -4.5 (c 0.5, CH<sub>2</sub>Cl<sub>2</sub>);

The product was analyzed by HPLC to determine the enantiomeric excess: 22% ee (Chiralpak OD-H, *i*-propanol/hexane = 6/94, flow rate 1 mL/min, λ = 254 nm); t<sub>r</sub> = 11.60 and 14.27 min.

**<sup>1</sup>H NMR (400 MHz, CDCl<sub>3</sub>)** δ 7.50 – 7.39 (m, 2H), 7.36 – 7.27 (m, 3H), 5.80 (ddd, *J* = 17.7, 10.0, 7.8 Hz, 1H), 5.22 – 5.13 (m, 2H), 3.81 – 3.63 (m, 3H).

**<sup>13</sup>C NMR (101 MHz, CDCl<sub>3</sub>)** δ 135.2, 133.2, 132.8, 128.9, 127.7, 118.2, 63.6, 54.6.

**HRMS (ESI+)** Calcd. For C<sub>10</sub>H<sub>12</sub>OSNa<sup>+</sup> ([M+Na]<sup>+</sup>): 203.0501, found: 203.0501.

### HPLC chromatogram of compound 12

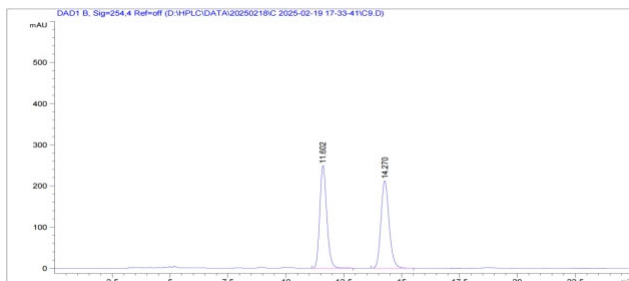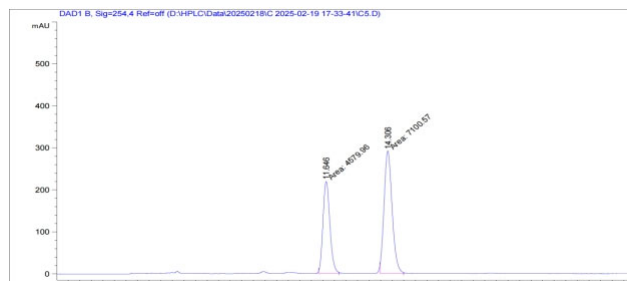

| Peak # | RetTime [min] | Type | Width [min] | Area [mAU*s] | Height [mAU] | Area %  | Peak # | RetTime [min] | Type | Width [min] | Area [mAU*s] | Height [mAU] | Area %  |
|--------|---------------|------|-------------|--------------|--------------|---------|--------|---------------|------|-------------|--------------|--------------|---------|
| 1      | 11.602        | BB   | 0.3236      | 5203.80615   | 249.23286    | 50.1081 | 1      | 11.646        | MF   | 0.3479      | 4579.96045   | 219.42577    | 39.2102 |
| 2      | 14.270        | BB   | 0.3768      | 5181.34863   | 212.27002    | 49.8919 | 2      | 14.306        | MF   | 0.4051      | 7100.56592   | 292.10580    | 60.7898 |

c) Cross-over experiments

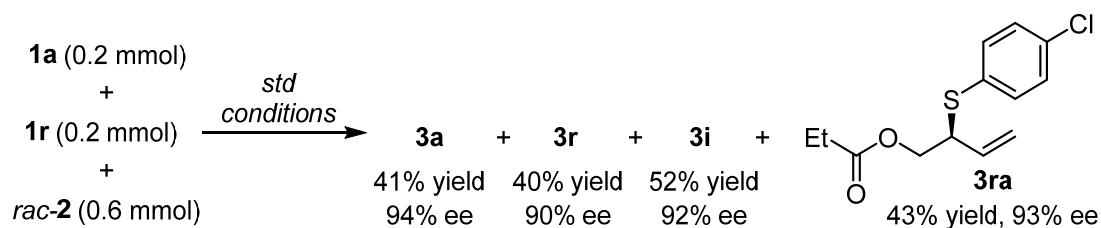

A flame dried Schlenk tube was cooled to rt, and it was then evacuated and backfilled with argon for three times. To this Schlenk tube was added (*S,S,S*)-[Ir\*]-**1** (0.02 mmol, 10 mol %), thioester **1a** (0.20 mmol, 1.0 equiv.), **1r** (0.20 mmol, 1.0 equiv.), VEC **2** (1.2 mmol, 6 equiv.), DABCO (0.2 mmol, 2 equiv.) and DCE (4 mL). The reaction was stirred at 50 °C for 12 hours. Once starting material was consumed (monitored by TLC), the solvent was evaporated under reduced pressure and the residue was purified by column chromatography to give the products **3a**, **3q**, **3i** and **3ra**, which were then directly analyzed by HPLC to determine the enantiomeric excess.

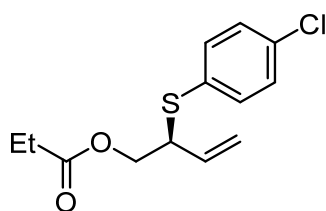

**(*S*)-2-((4-chlorophenyl)thio)but-3-en-1-yl propionate (3ra):** yield (23.0 mg, 43%); colorless oil;  $[\alpha]_D^{15} = +8.04$  ( $c$  2.00,  $\text{CH}_2\text{Cl}_2$ ); The product was analyzed by HPLC to determine the enantiomeric excess: 93% ee (Chiralpak OJ-H, *i*-propanol/hexane = 2/98, flow rate 1 mL/min,  $\lambda = 254$  nm);  $t_r = 7.76$  and 8.36 min.

**$^1\text{H}$  NMR (400 MHz,  $\text{CDCl}_3$ )**  $\delta$  7.43 – 7.32 (m, 2H), 7.30 – 7.22 (m, 2H), 5.73 (ddd,  $J = 17.0, 10.3, 8.3$  Hz, 1H), 5.16 – 5.03 (m, 2H), 4.29 – 4.16 (m, 2H), 3.92 – 3.77 (m, 1H), 2.31 (q,  $J = 7.6$  Hz, 2H), 1.12 (t,  $J = 7.6$  Hz, 3H).

**$^{13}\text{C}$  NMR (101 MHz,  $\text{CDCl}_3$ )**  $\delta$  174.1, 134.5, 134.4, 133.9, 131.6, 129.0, 118.2, 65.0, 50.4, 27.4, 9.0.

**HRMS (ESI+)** Calcd. For  $\text{C}_{13}\text{H}_{15}\text{ClO}_2\text{SNa}^+$  ( $[\text{M}+\text{Na}]^+$ ): 293.0373, found: 293.0375.

**HPLC chromatogram of compound 3ra**

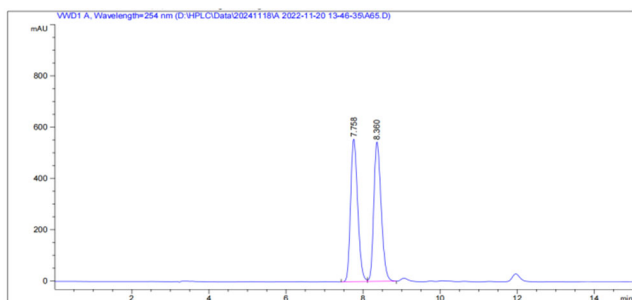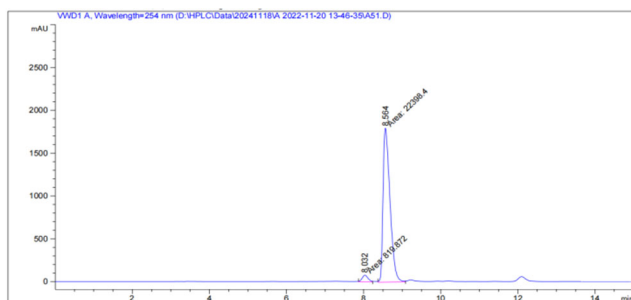

| Peak # | RetTime [min] | Type | Width [min] | Area [mAU*s] | Height [mAU] | Area %  | Peak # | RetTime [min] | Type | Width [min] | Area [mAU*s] | Height [mAU] | Area %  |
|--------|---------------|------|-------------|--------------|--------------|---------|--------|---------------|------|-------------|--------------|--------------|---------|
| 1      | 7.758         | BV   | 0.1998      | 7135.50342   | 555.88275    | 49.6349 | 1      | 8.032         | MM   | 0.1775      | 819.87244    | 76.99979     | 3.5312  |
| 2      | 8.360         | VB   | 0.2063      | 7240.47412   | 543.97180    | 50.3651 | 2      | 8.564         | MM   | 0.2077      | 2.23984e4    | 1797.26355   | 96.4688 |



## 7. X-ray structure of *ent*-5

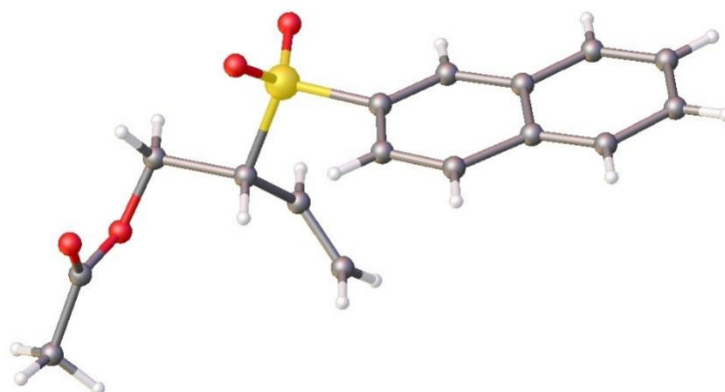

**Figure S1.** X-ray structure of *ent*-5 (using (*R,R,R*)-[Ir\*]-1 as the catalyst)

Crystal data for *ent*-5 (using (*R,R,R*)-[Ir\*]-1 as the catalyst): 16 (C<sub>16</sub>H<sub>16</sub>O<sub>4</sub>S),  $M_r = 4855.44$ ,  $T = 100$  K, Monoclinic, space group  $P1211$ ,  $a = 5.7878(1)$ ,  $b = 33.2044(6)$ ,  $c = 30.9443(5)$  Å,  $\alpha = 90$ ,  $\beta = 89.996(2)$ ,  $\gamma = 90$ ,  $V = 5946.89(18)$  Å<sup>3</sup>,  $Z = 1$ , 7005 unique reflections, final  $R_1 = 0.0733(21057)$  and  $wR_2 = 0.1909(21664)$  observed [ $I > 2\sigma(I)$ ] reflections, Flack = -0.009(7). CCDC 2411685 contains the supplementary crystallographic data for this paper. These data can be obtained free of charge via [www.ccdc.cam.ac.uk/conts/retrieving.html](http://www.ccdc.cam.ac.uk/conts/retrieving.html) (or from the Cambridge Crystallographic Data Centre, 12, Union Road, Cambridge CB21EZ, UK; fax: (+44) 1223-336-033; or [deposit@ccdc.cam.ac.uk](mailto:deposit@ccdc.cam.ac.uk)).

## 8. References

1. Singh, P.; Peddinti, R. K. Harnessing the catalytic behaviour of 1,1,1,3,3,3-hexafluoro-2-propanol (HFIP): An expeditious synthesis of thioesters. *Tetrahedron Lett.* **2017**, *58*, 1875-1878.
2. Xuan, M.; Lu, C.; Liu, M.; Lin, B.-L. Air-Tolerant Direct Thiol Esterification with Carboxylic Acids Using Hydrosilane via Simple Inorganic Base Catalysis. *J. Org. Chem.* **2019**, *84*, 7694–7701.
3. Kang, X.; Ren, M.; Zhu, M.; Zhang, K. Azide-Functionalized Nanoclusters via a Ligand-Induced Rearrangement. *Chem. Mater.* **2020**, *32*, 6736–6743.
4. Soria-Castro, S. M.; Peñeñory, A. B. Efficient Cu-catalyzed base-free C–S coupling under conventional and microwave heating. A simple access to S-heterocycles and sulfides. *Beilstein J. Org. Chem.* **2013**, *9*, 467-475.
5. Masayasu, I.; Iwao, E.; Nobukazu, W.; Ryuzo, A.; Fumio, N.; Fumio, M. Novel copolymers and superoxide dismutase modified with said copolymers. EP314042 A2 1989-05-03.
6. Tandon, N.; Patil, S. M.; Tandon, R.; Kumar, P. Magnetically recyclable silica-coated ferrite magnetite-K10 montmorillonite nanocatalyst and its applications in O, N, and S-acylation reaction under solvent-free conditions. *RSC Adv.* **2021**, *11*, 21291-21300.
7. Lombardi, L.; Mazzaro, R.; Gazzano, M.; Kovtun, A.; Morandi, V.; Bertuzzi, G.; Bandini, M. *Synthesis* **2022**, *54*, 1633-1642.
8. Tyson, E. L.; Ament, M. S.; Yoon, T. P. Transition Metal Photoredox Catalysis of Radical Thiol-Ene Reactions. *J. Org. Chem.* **2013**, *78*, 2046-2050.
9. Liu, X.-S.; Tang, Z.; Li, Z.; Li, M.; Xu, L.; Liu, L. Modular and stereoselective synthesis of tetrasubstituted vinyl sulfides leading to a library of AIEgens. *Nat. Commun.* **2021**, *12*, 7298.
10. Rynbrandt, R. H.; Dutton, F. E. Cleavage of a cyclopropane ring by singlet oxygen. *J. Org. Chem.* **1975**, *40*, 3079-3081.
11. Liang, L.; Xi, J.; Jiang, R.; Yang, Y.; Sun, F.; Zhang, L.; Li, X.; Liu, H. Ni-Catalyzed Aryl Thioester Synthesis via Thioester Transfer Reaction. *Chin. J. Org. Chem.* **2023**, *43*, 1566-1573.
12. Hamilton, J. Y.; David, S.; Carreira, E. M. Iridium-Catalyzed Enantioselective Allyl–Alkene Coupling. *J. Am. Chem. Soc.* **2014**, *136*, 3006-3009.
13. Younes, S. H. H.; Hollmann, F. A solvent-free synthesis of (thio)ester derivatives using FeCl<sub>3</sub> as a heterogeneous catalyst. *Tetrahedron Lett.* **2023**, *123*, 154524-154524.

14. Smith, C. R.; Mans, D. J.; Rajanbabu, T. V. (*R*)-2,2'-Binaphthoyl-(*S,S*)-Di(1-Phenylethyl) Aminophosphine. Scalable Protocols for the Syntheses of Phosphoramidite (Feringa) Ligands. *Org. Synth.* **2008**, *85*, 238-247.
15. Helmchen, G. Discussion Addendum for: Dibenzo[a,e]cyclooctene: Multigram Synthesis of a Bidentate Ligand. *Org. Synth.* **2020**, *97*, 66-78.
16. Spiess, S.; Jevgenij, J. A.; Gnam, C. Brödner, K.; Helmchen, G. Ir-Catalyzed Asymmetric Allylic Substitutions with (Phosphoramidite)Ir Complexes-Resting States, Synthesis, and Characterization of Catalytically Active ( $\pi$ -Allyl)Ir Complexes. *Chem. Eur. J.* **2009**, *15*, 11087-11090.
17. Xiao, L.; Wei, L.; Wang, C.-J. Stereodivergent Synthesis of Enantioenriched  $\gamma$ -Butyrolactones Bearing Two Vicinal Stereocenters Enabled by Synergistic Copper and Iridium Catalysis. *Angew. Chem. Int. Ed.* **2021**, *60*, 24930-24940.

## 9. NMR spectra

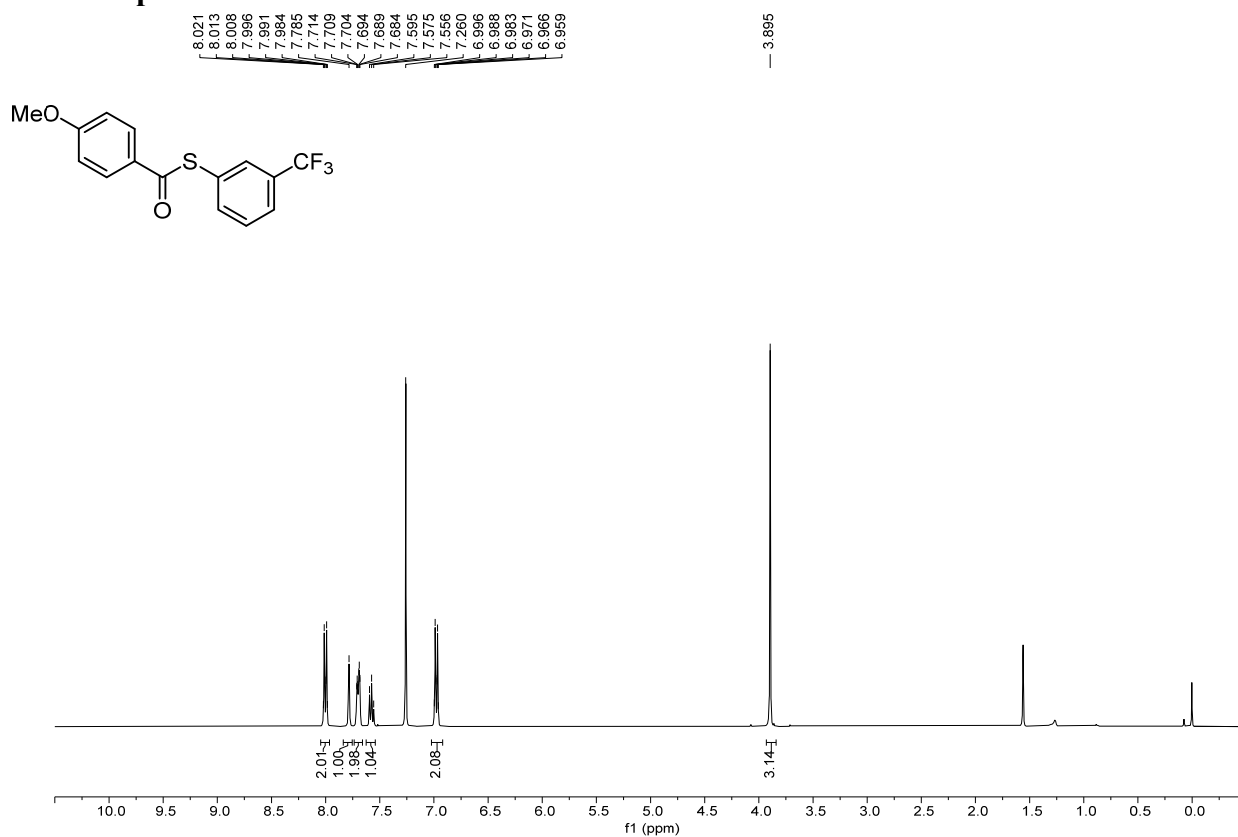

<sup>1</sup>H NMR (400 MHz, CDCl<sub>3</sub>) of 1w

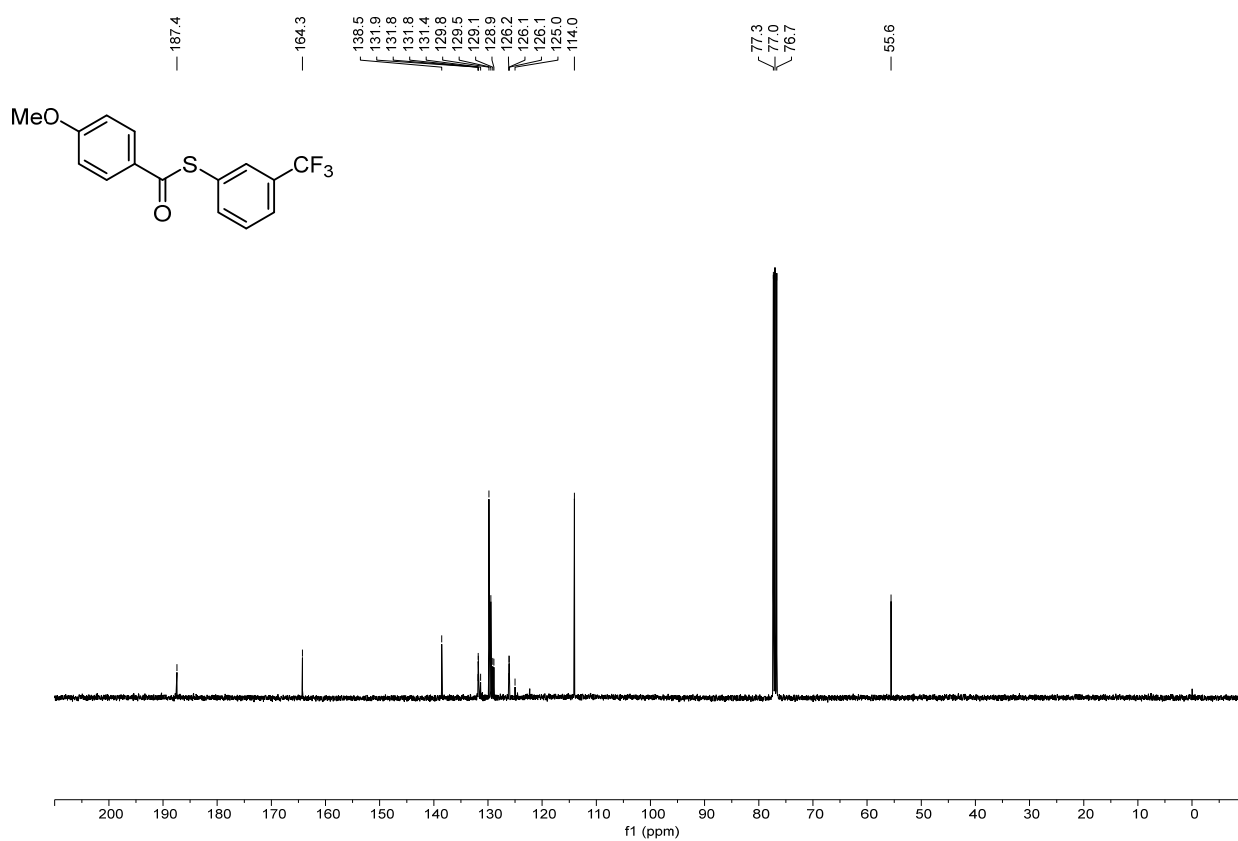

<sup>13</sup>C NMR (101 MHz, CDCl<sub>3</sub>) of 1w

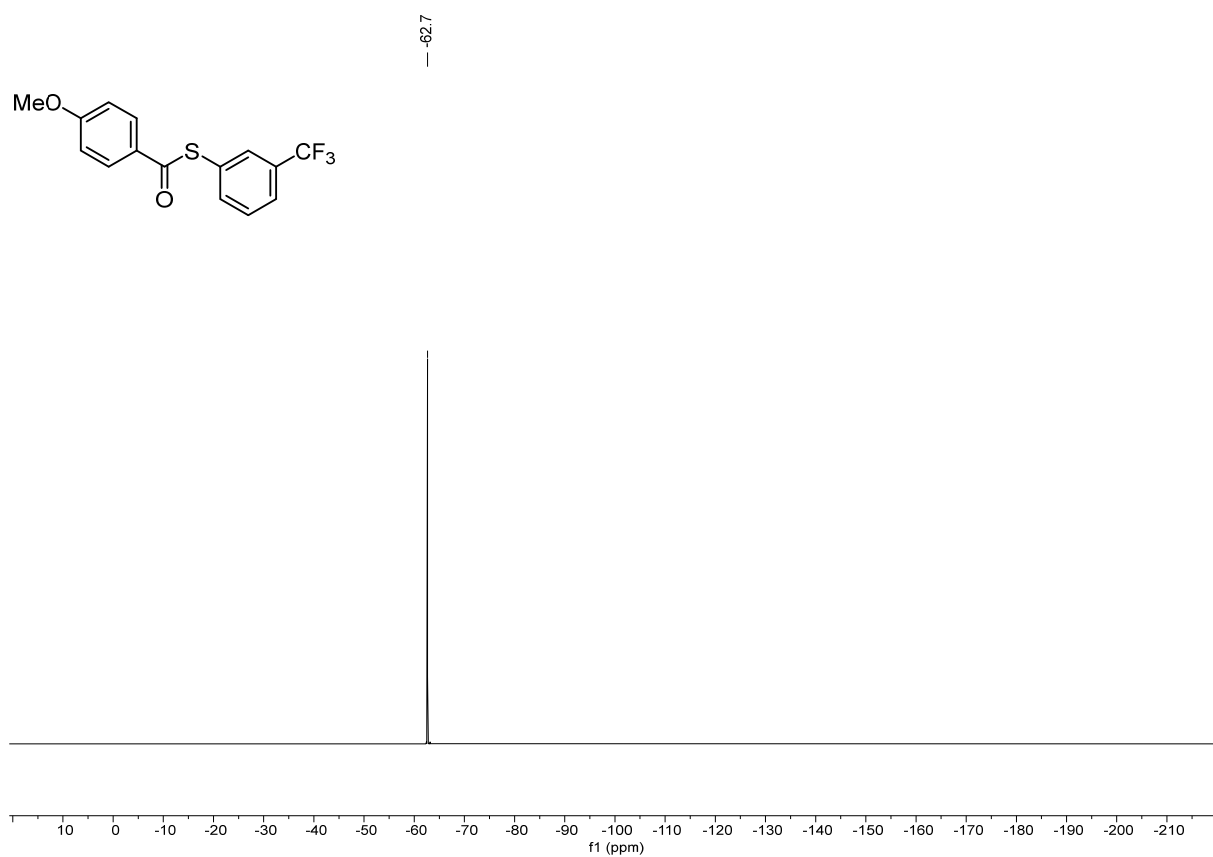

$^{19}\text{F}$  NMR (377 MHz,  $\text{CDCl}_3$ ) of **1w**

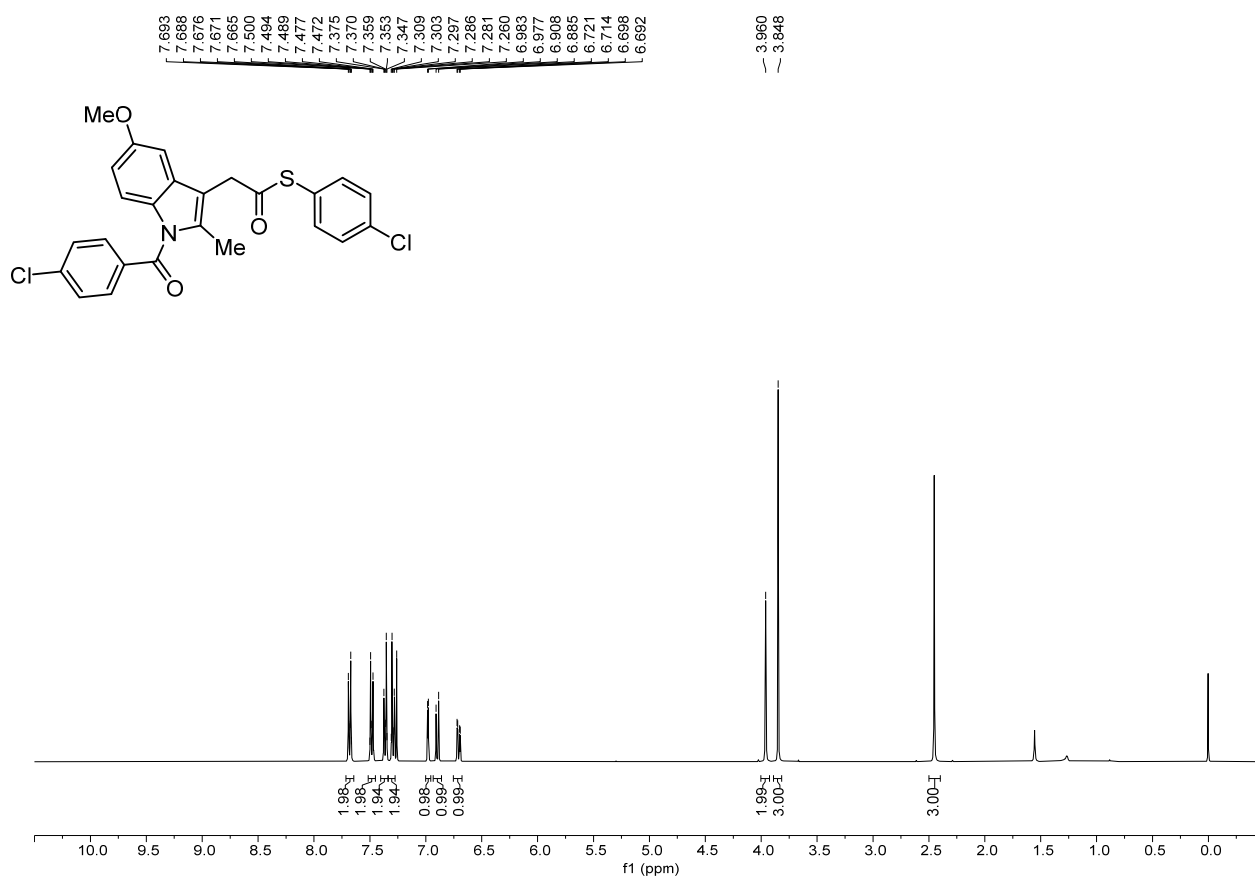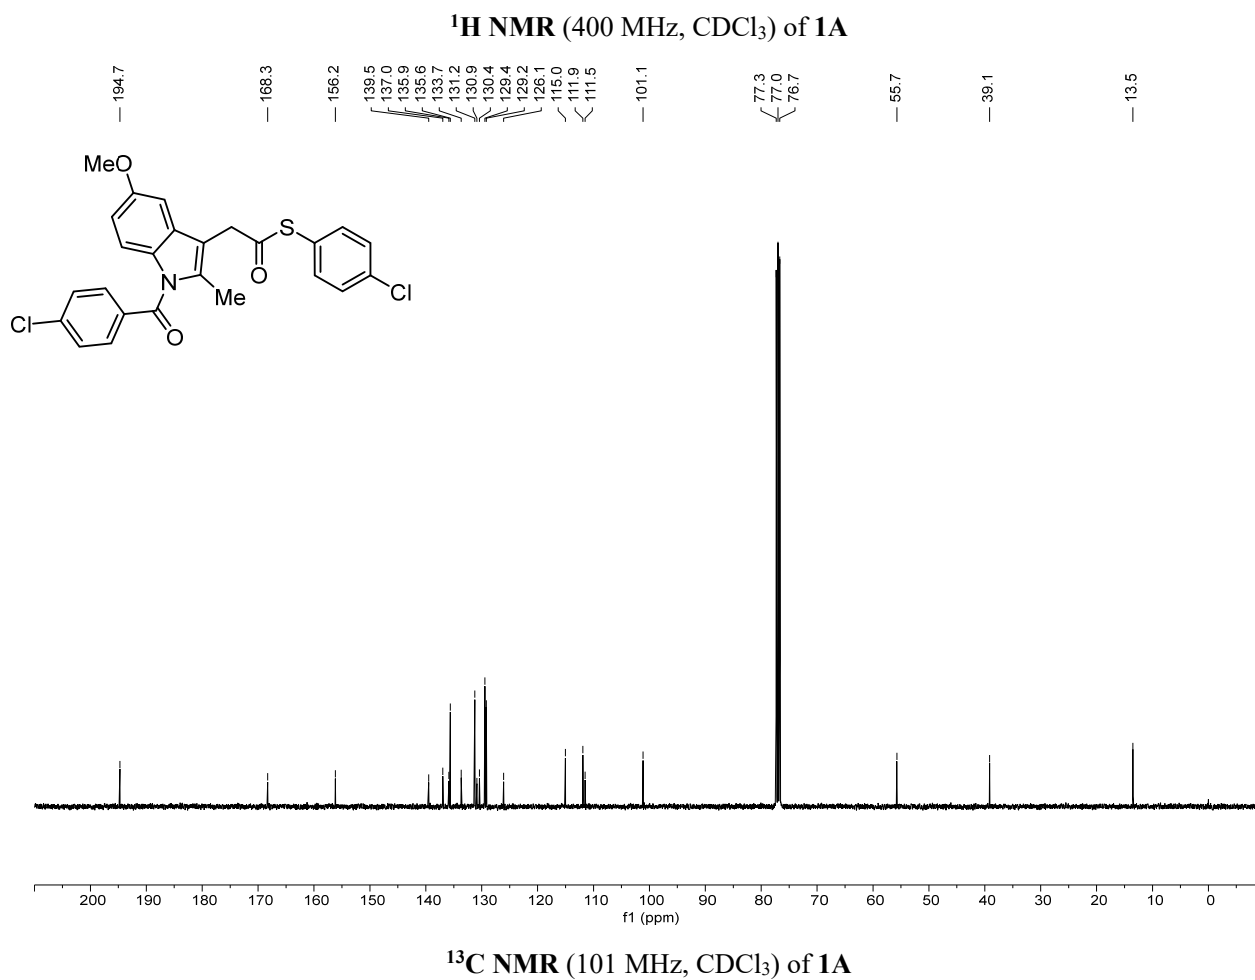

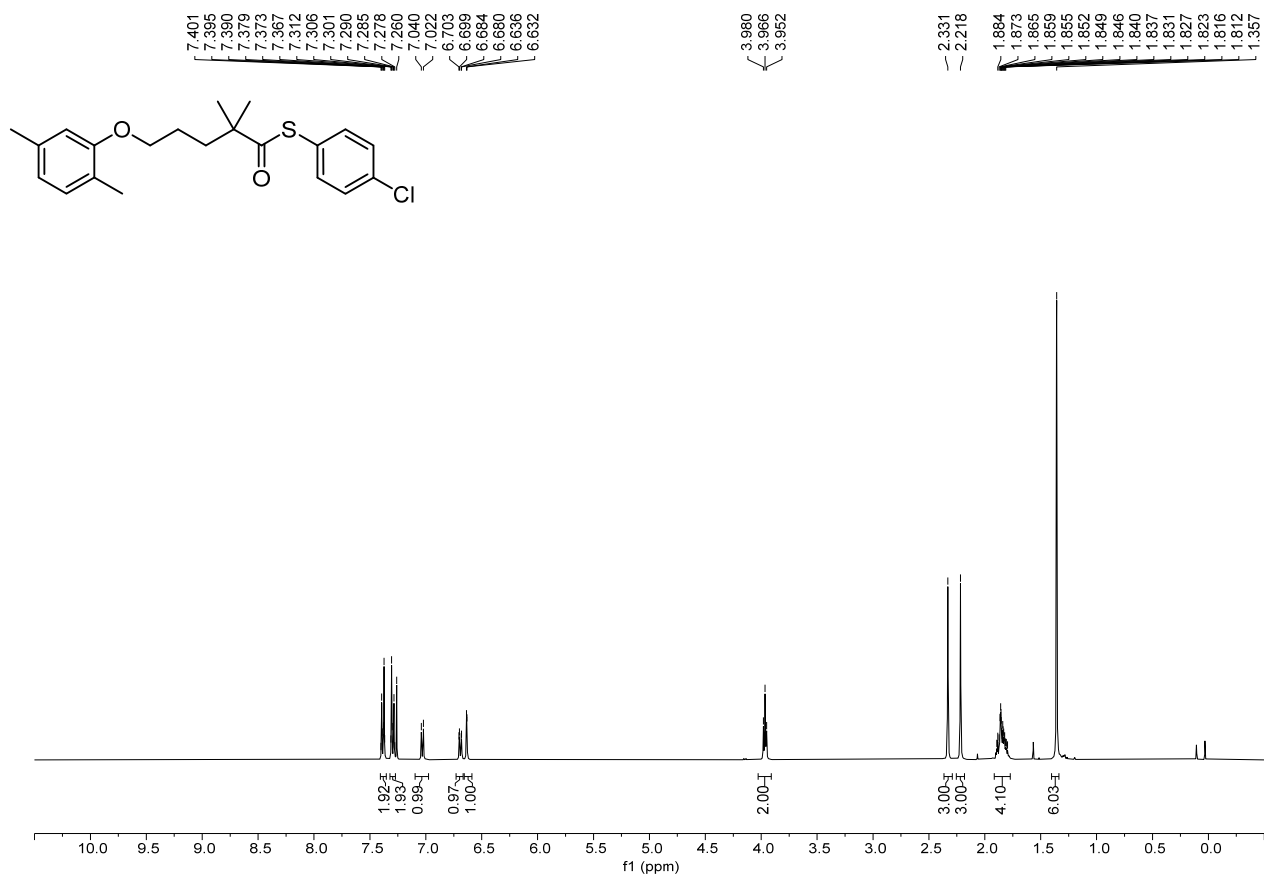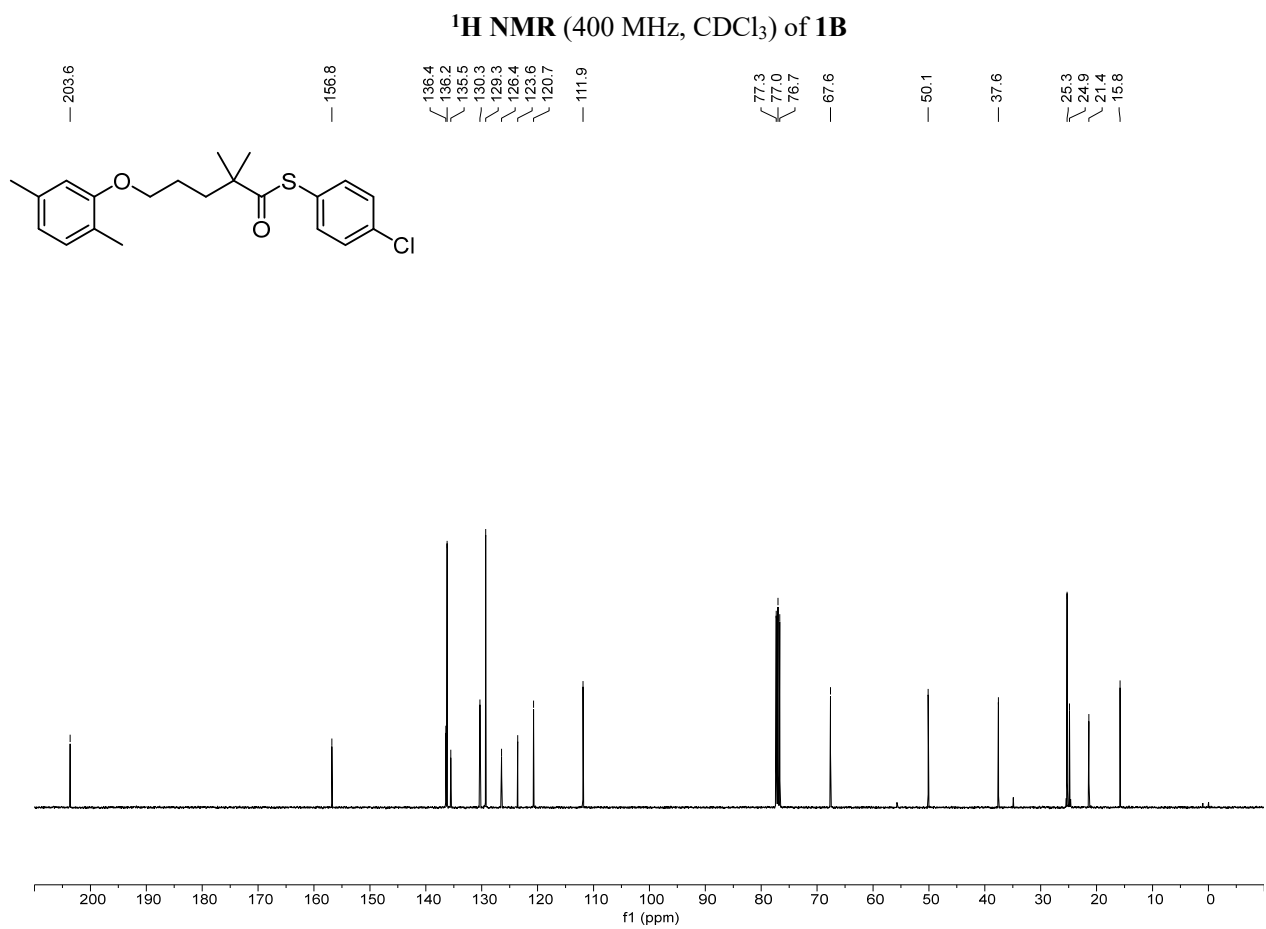

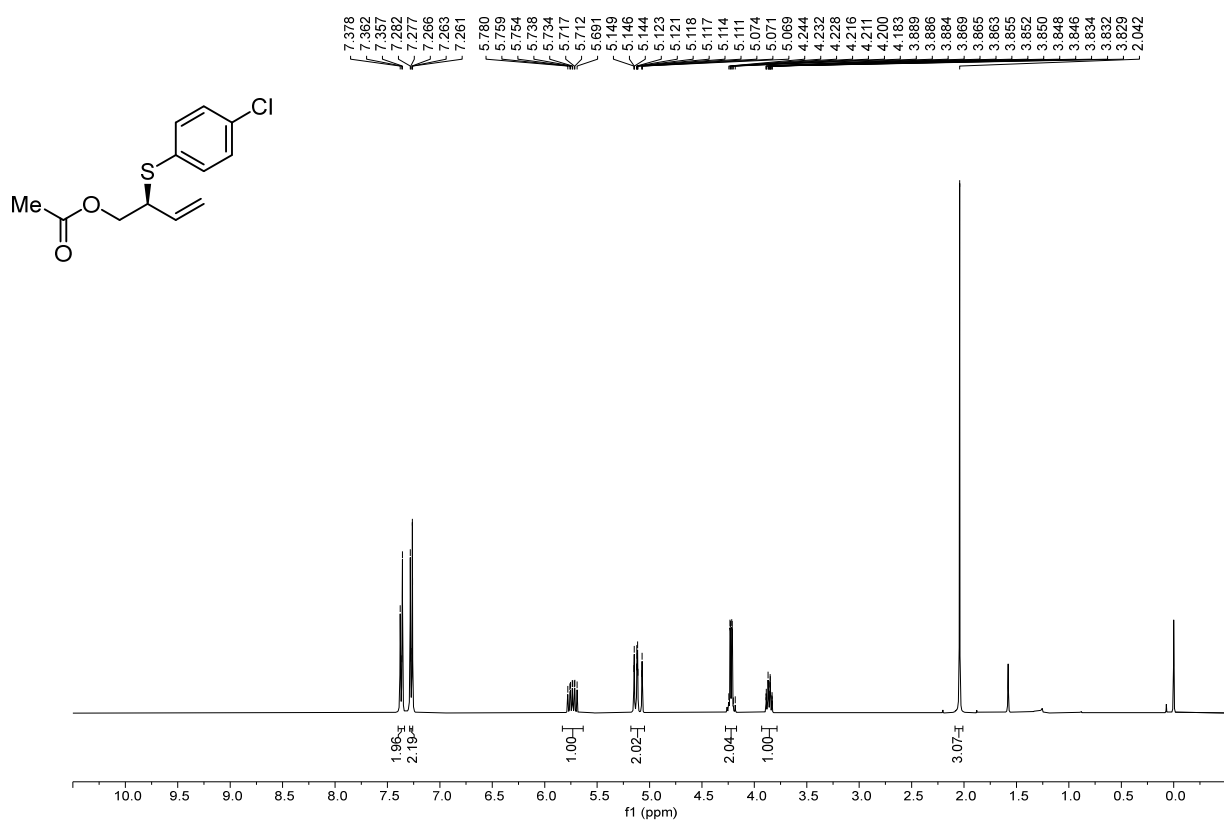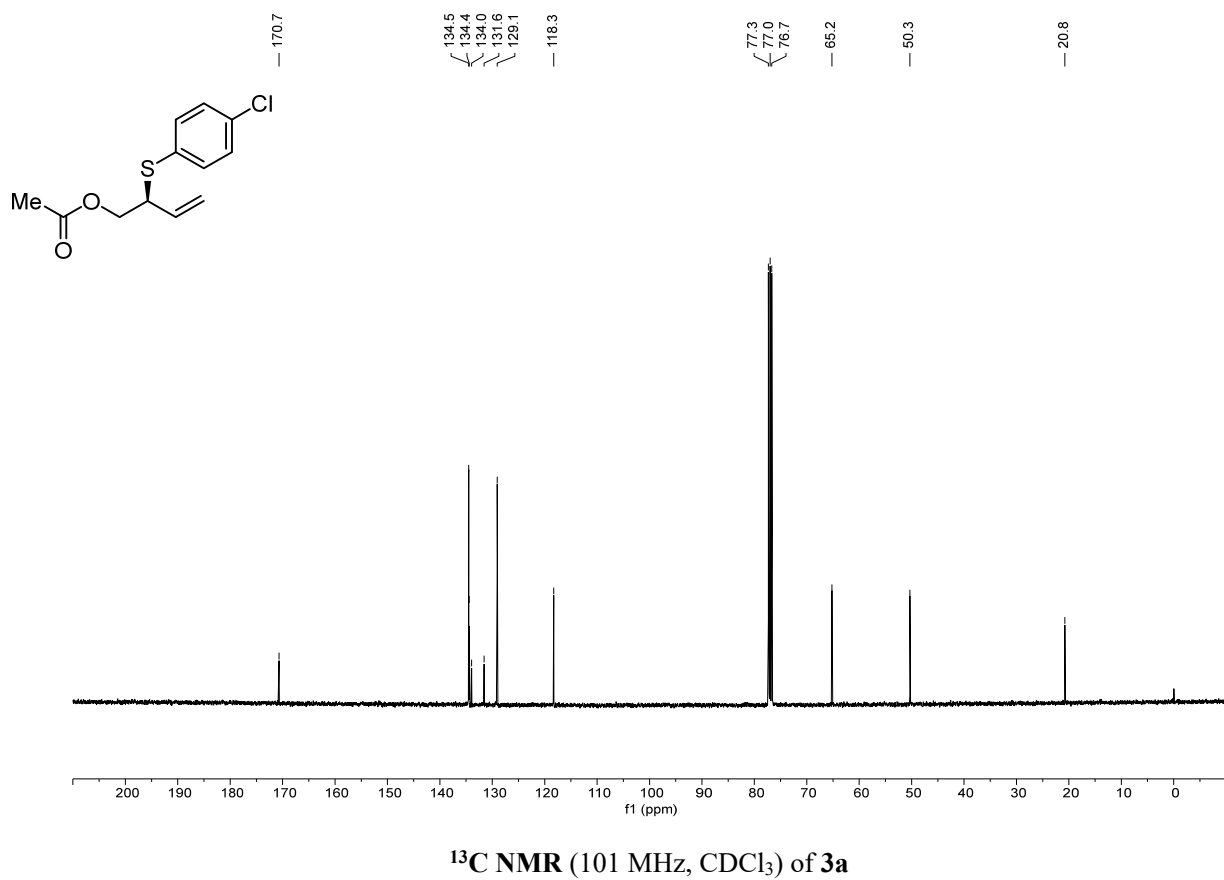



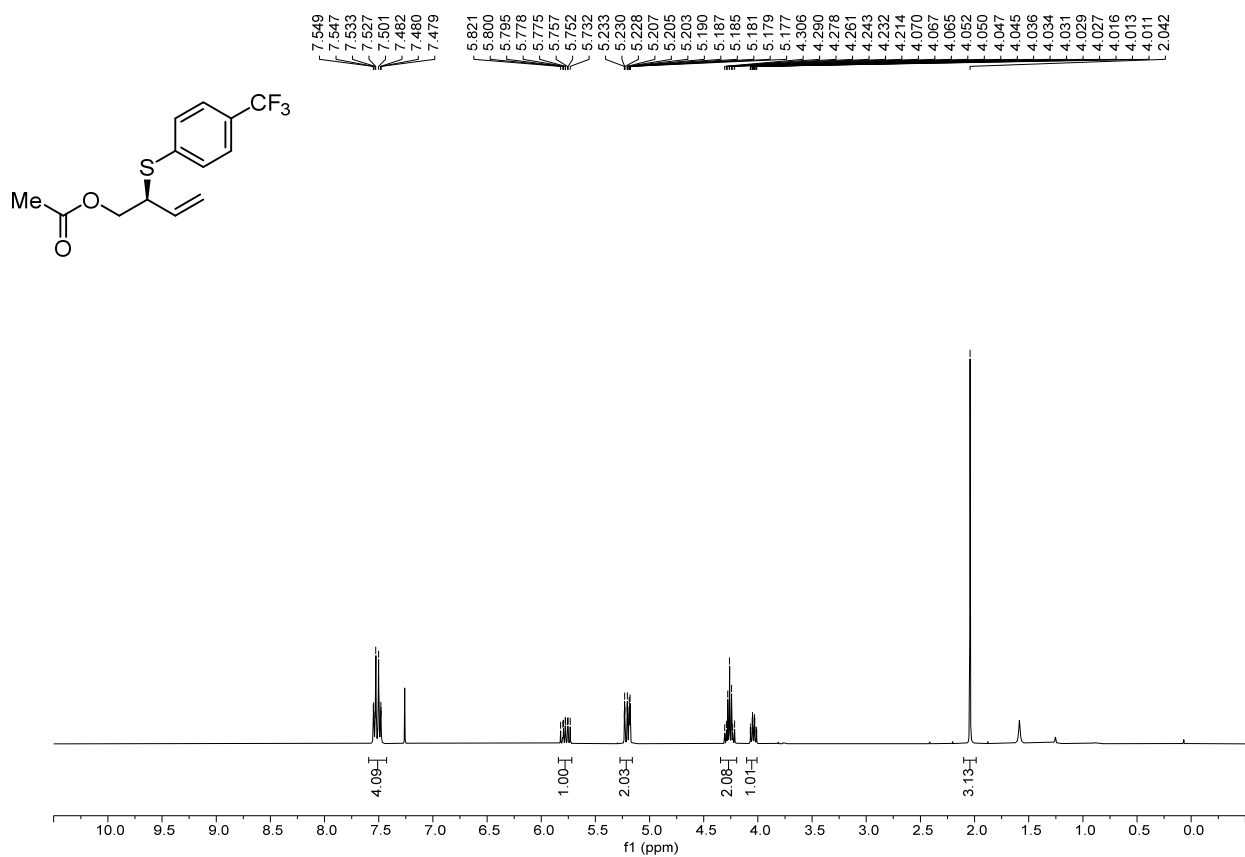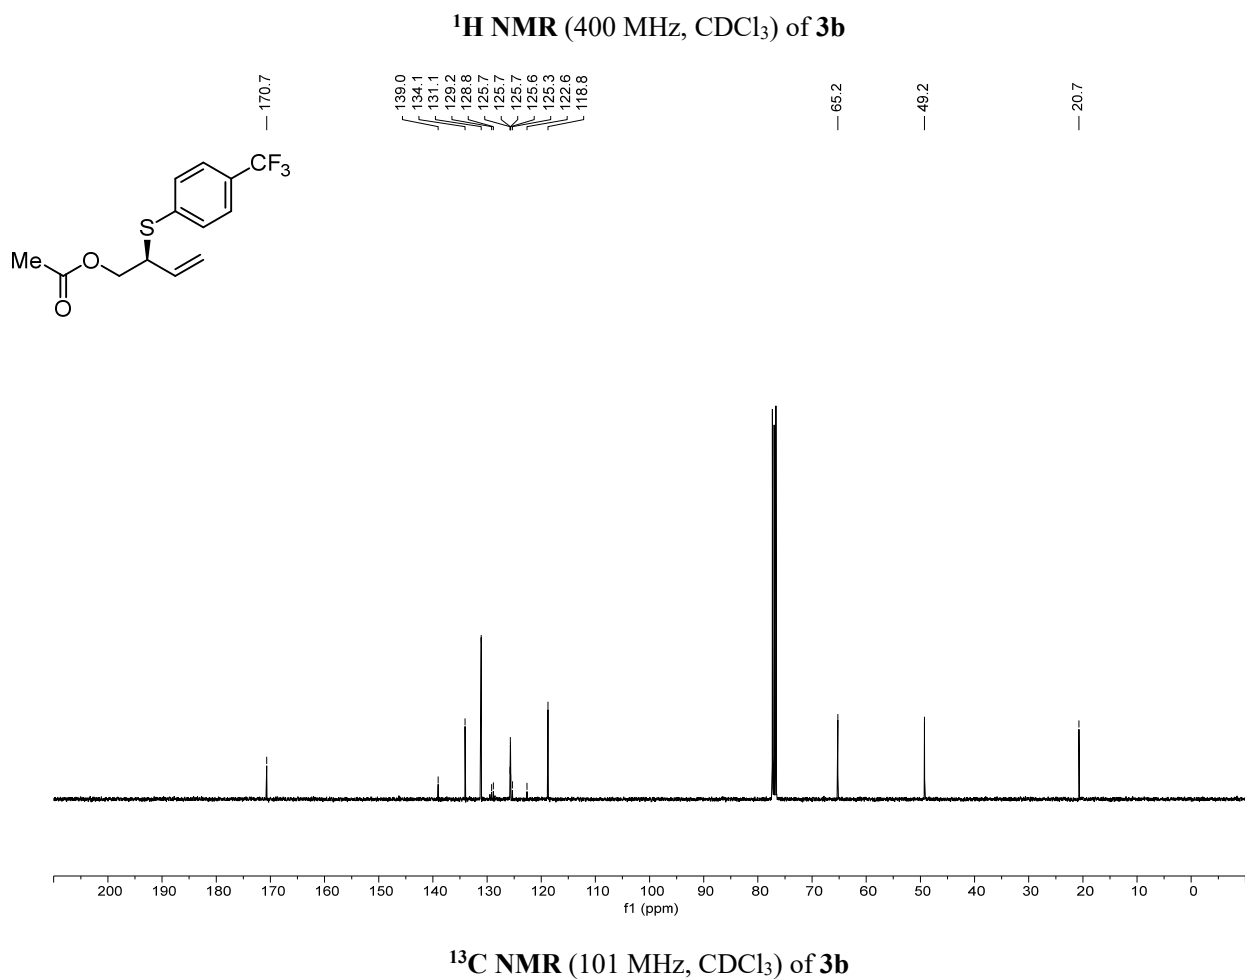

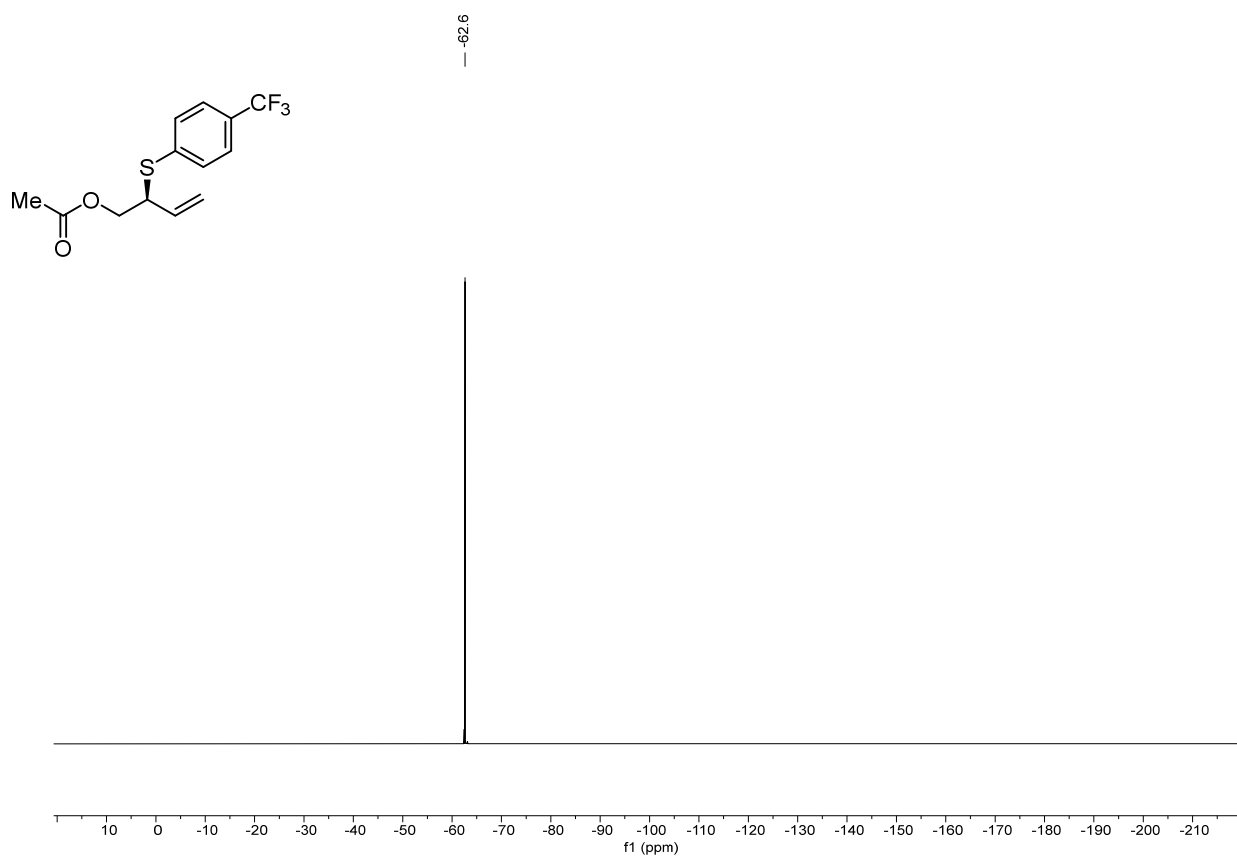

$^{19}\text{F}$  NMR (377 MHz,  $\text{CDCl}_3$ ) of **3b**

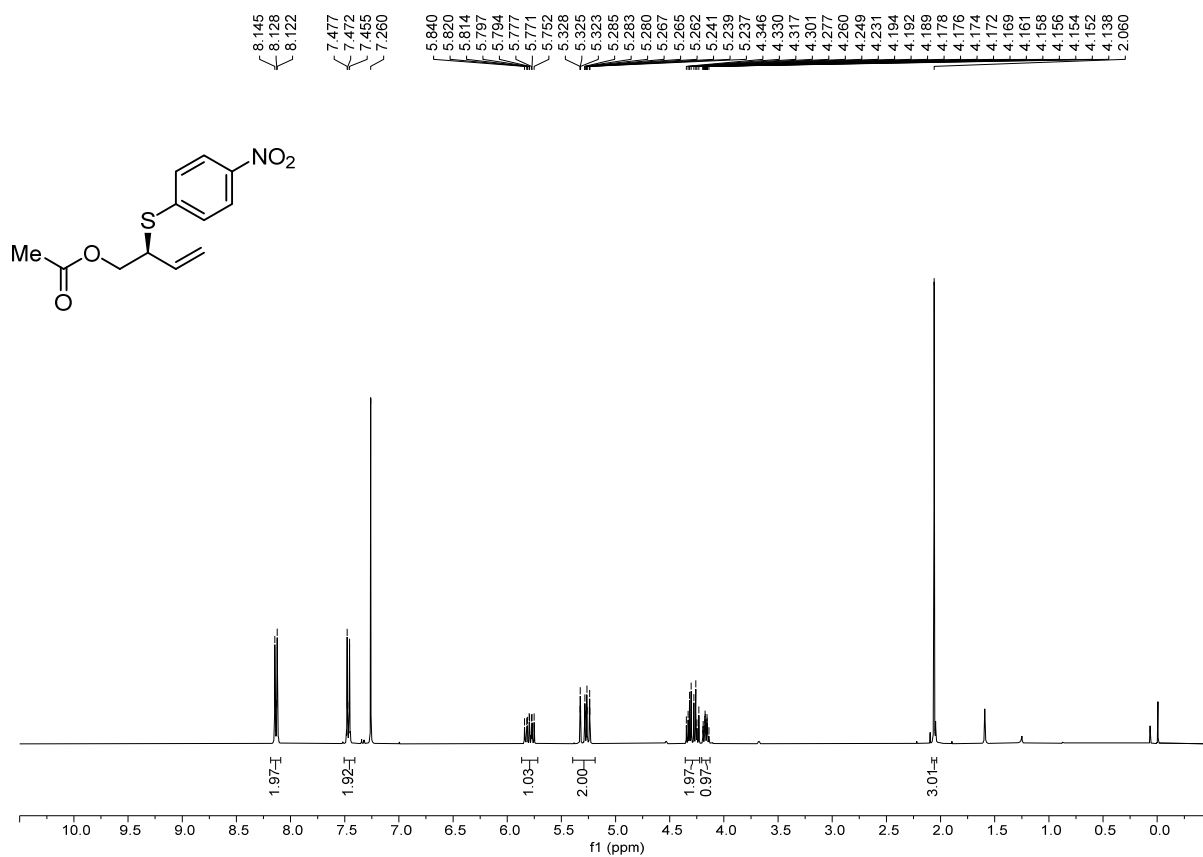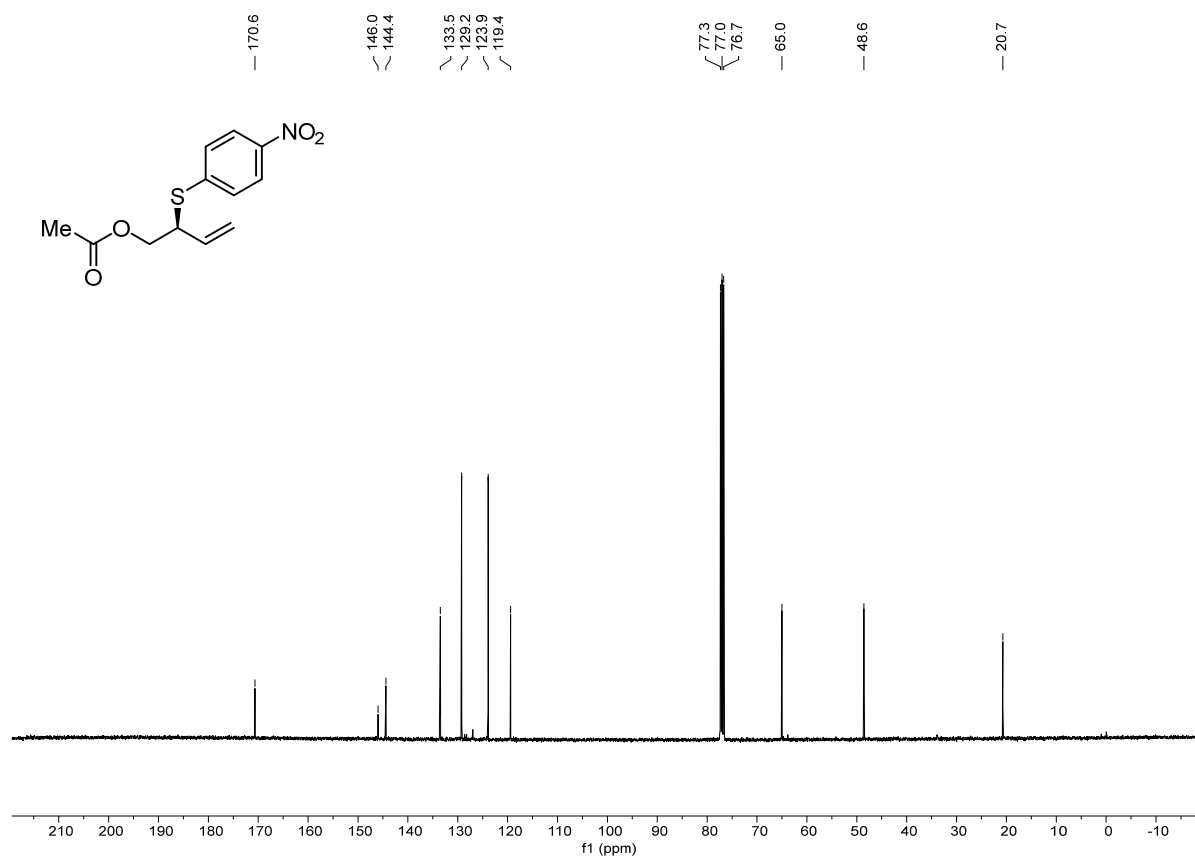

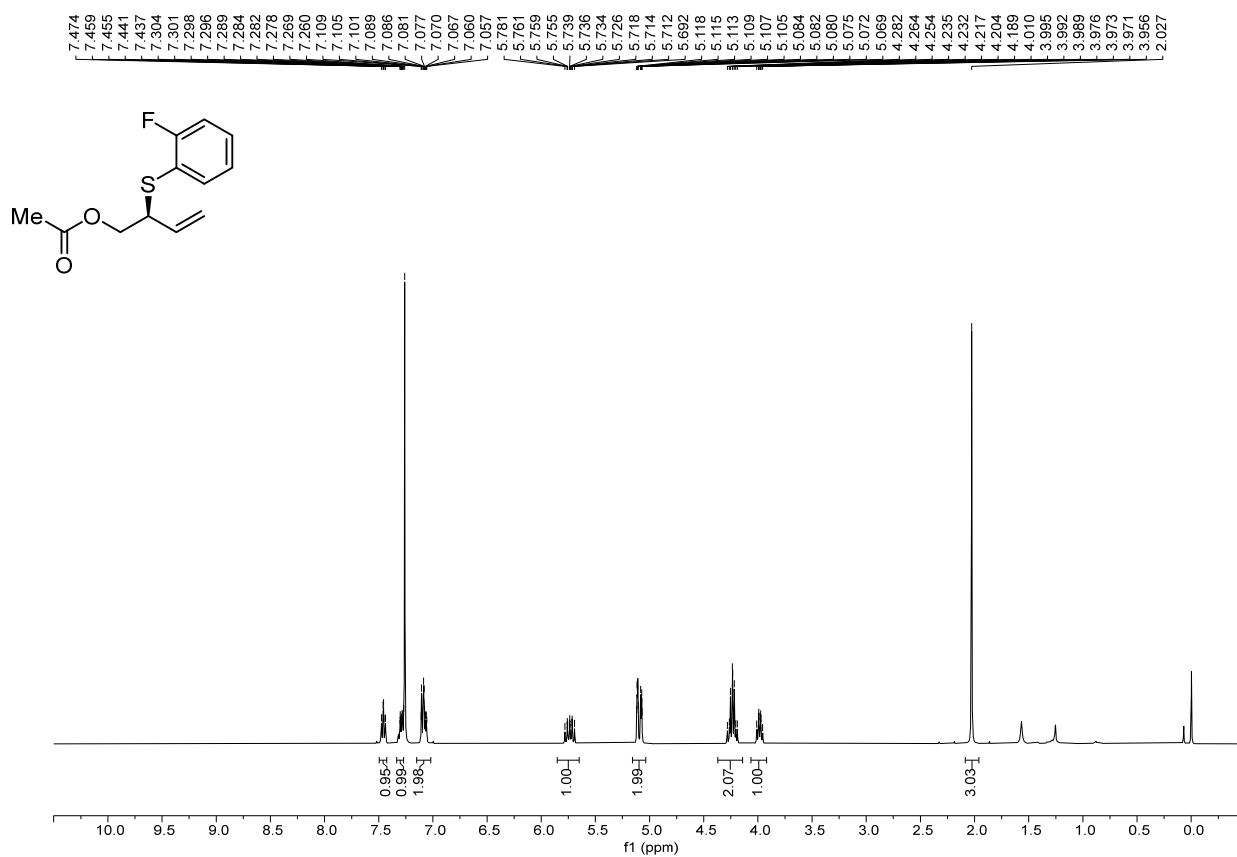

<sup>1</sup>H NMR (400 MHz, CDCl<sub>3</sub>) of **3d**

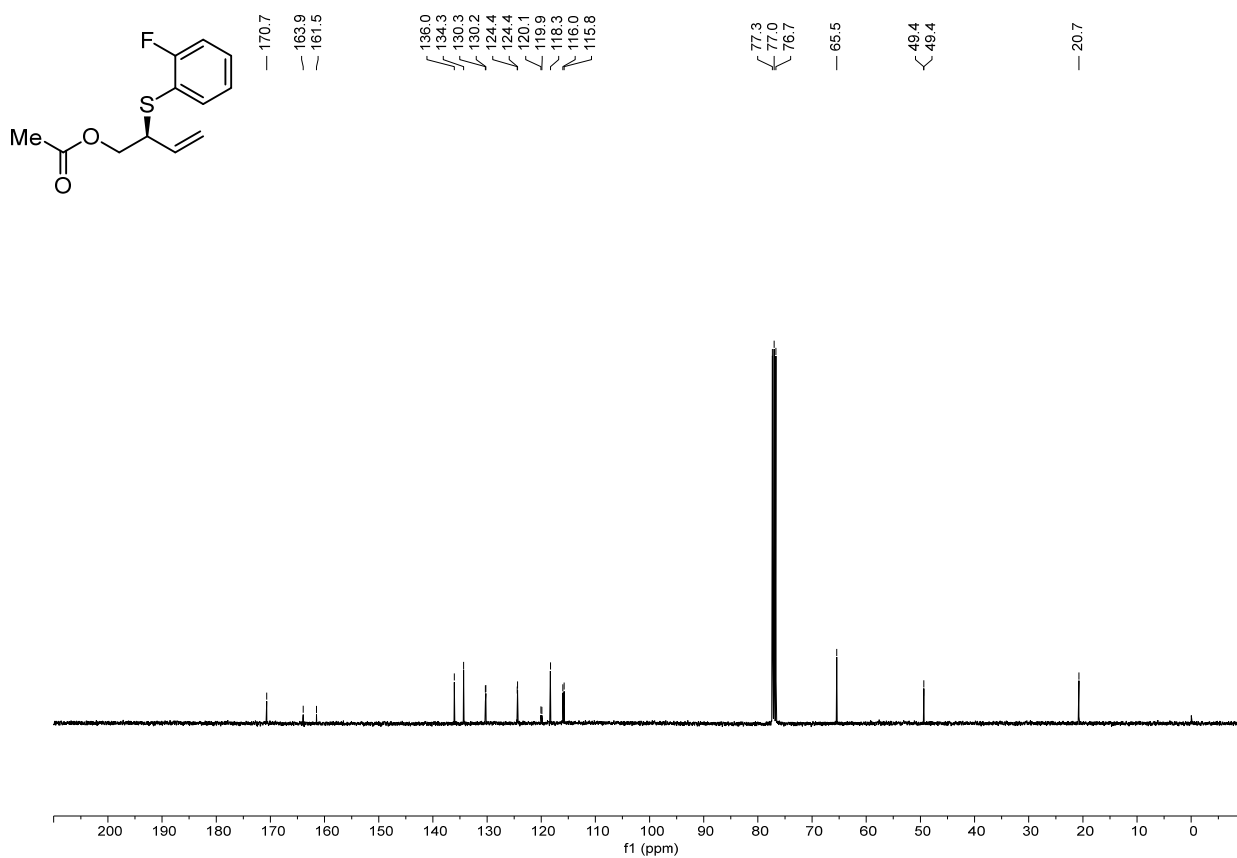

<sup>13</sup>C NMR (101 MHz, CDCl<sub>3</sub>) of **3d**

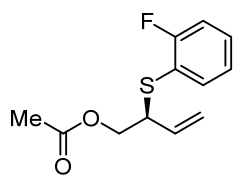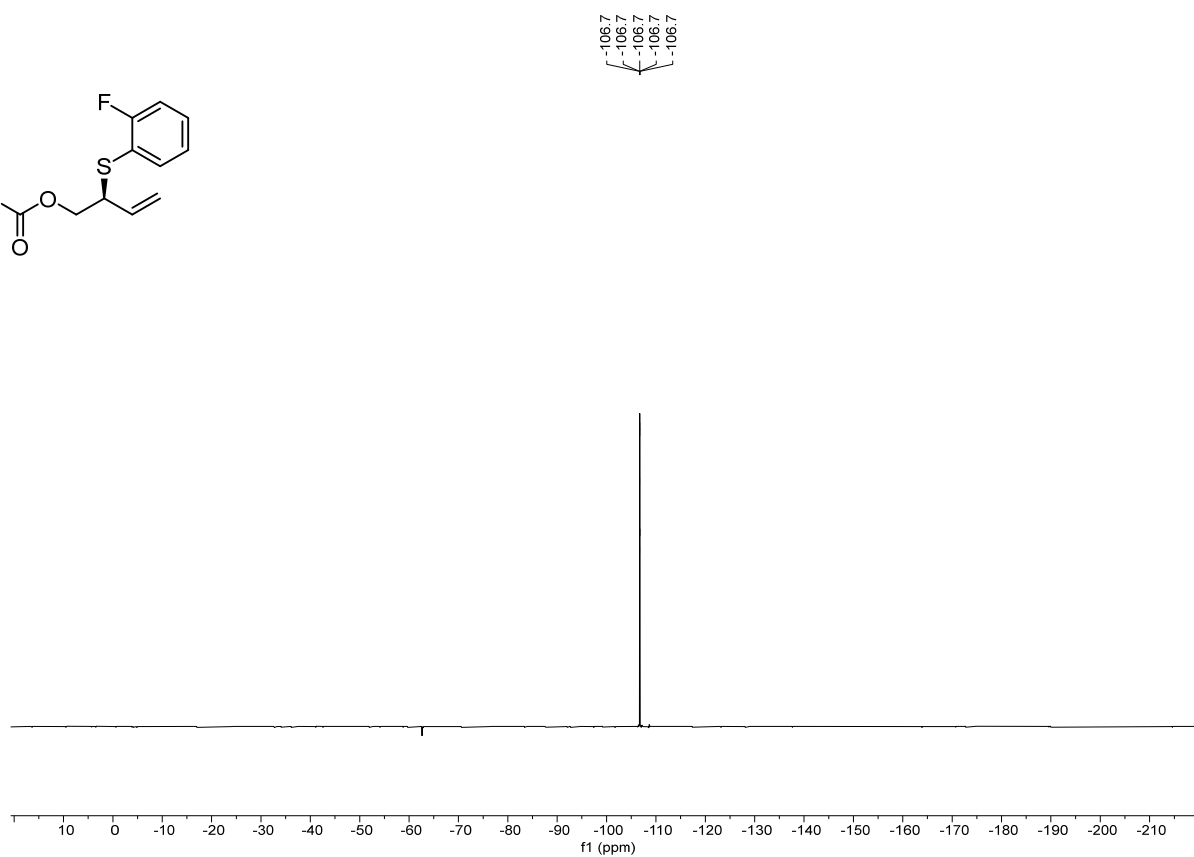

**$^{19}\text{F}$  NMR (377 MHz,  $\text{CDCl}_3$ ) of **3d****

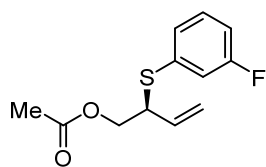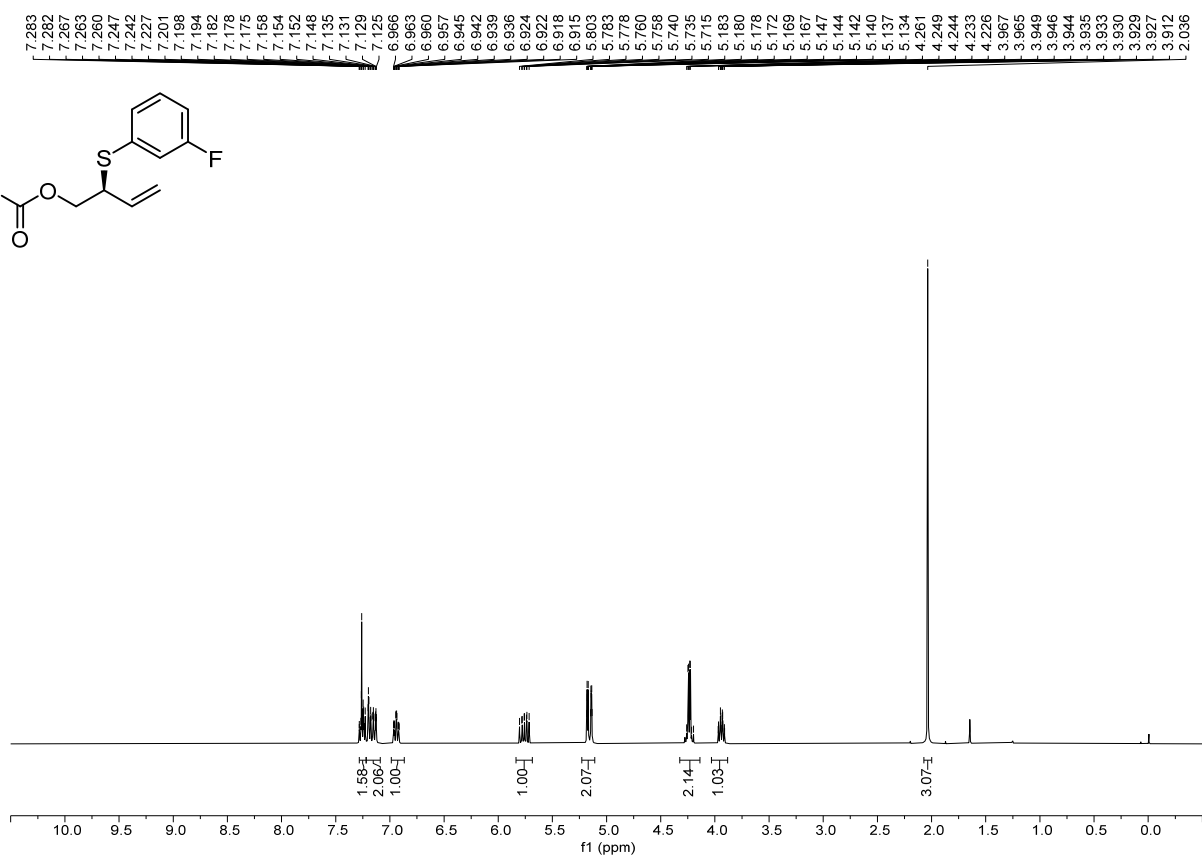

$^1\text{H}$  NMR (400 MHz,  $\text{CDCl}_3$ ) of **3e**

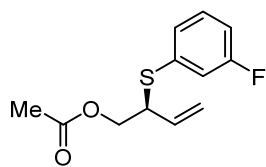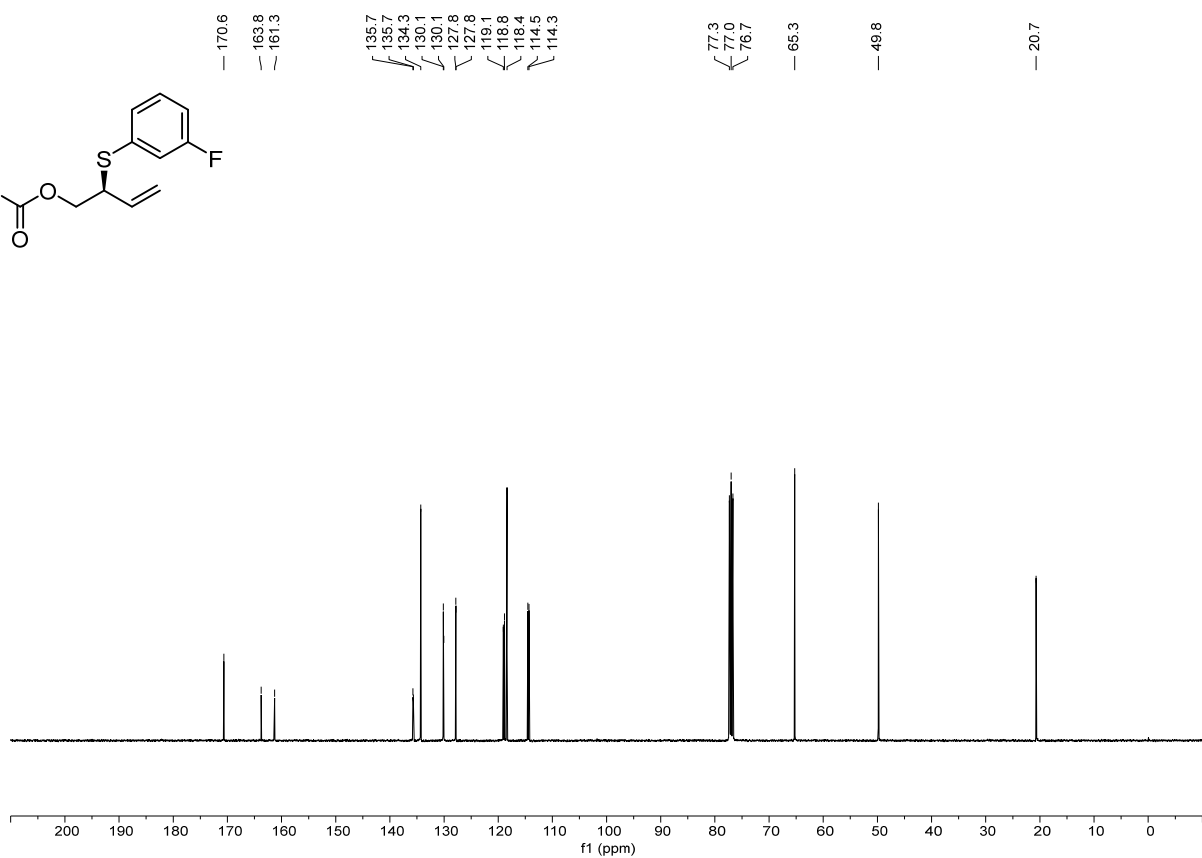

$^{13}\text{C}$  NMR (101 MHz,  $\text{CDCl}_3$ ) of **3e**

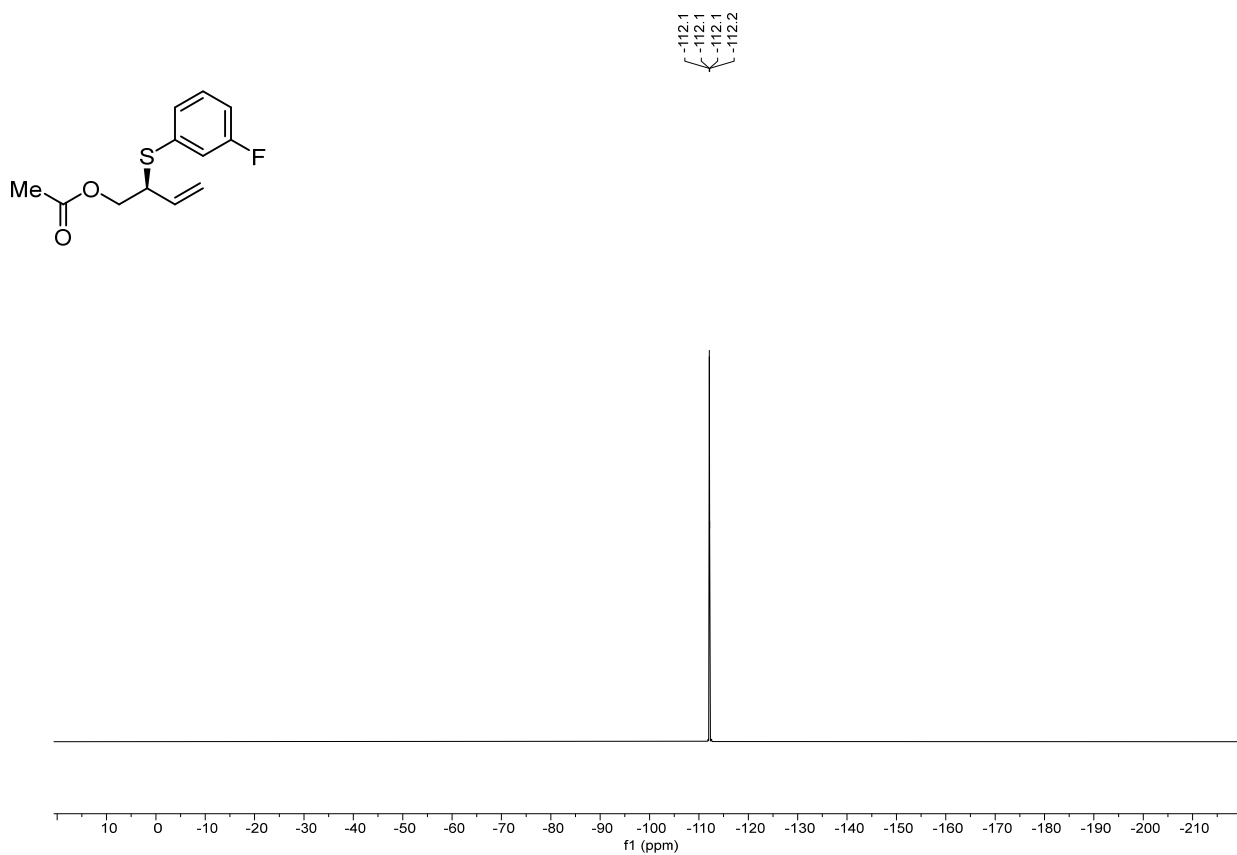

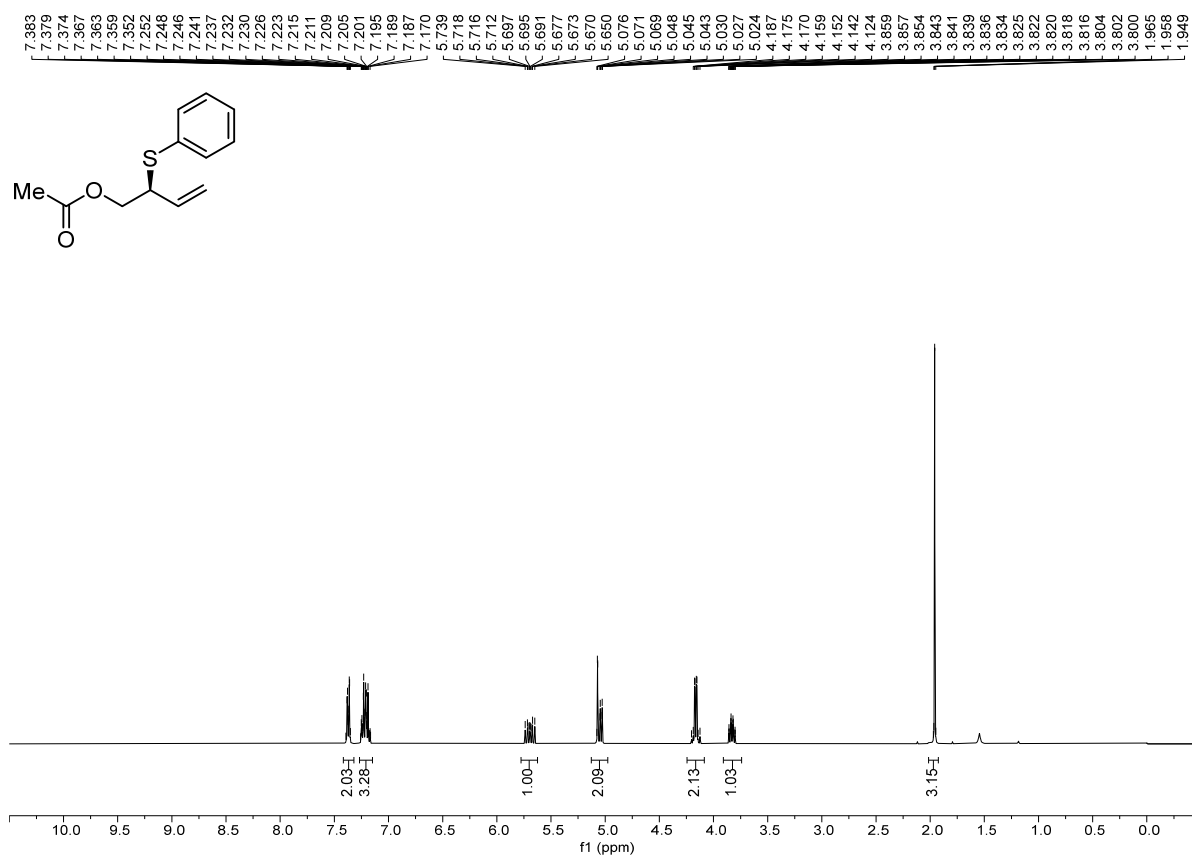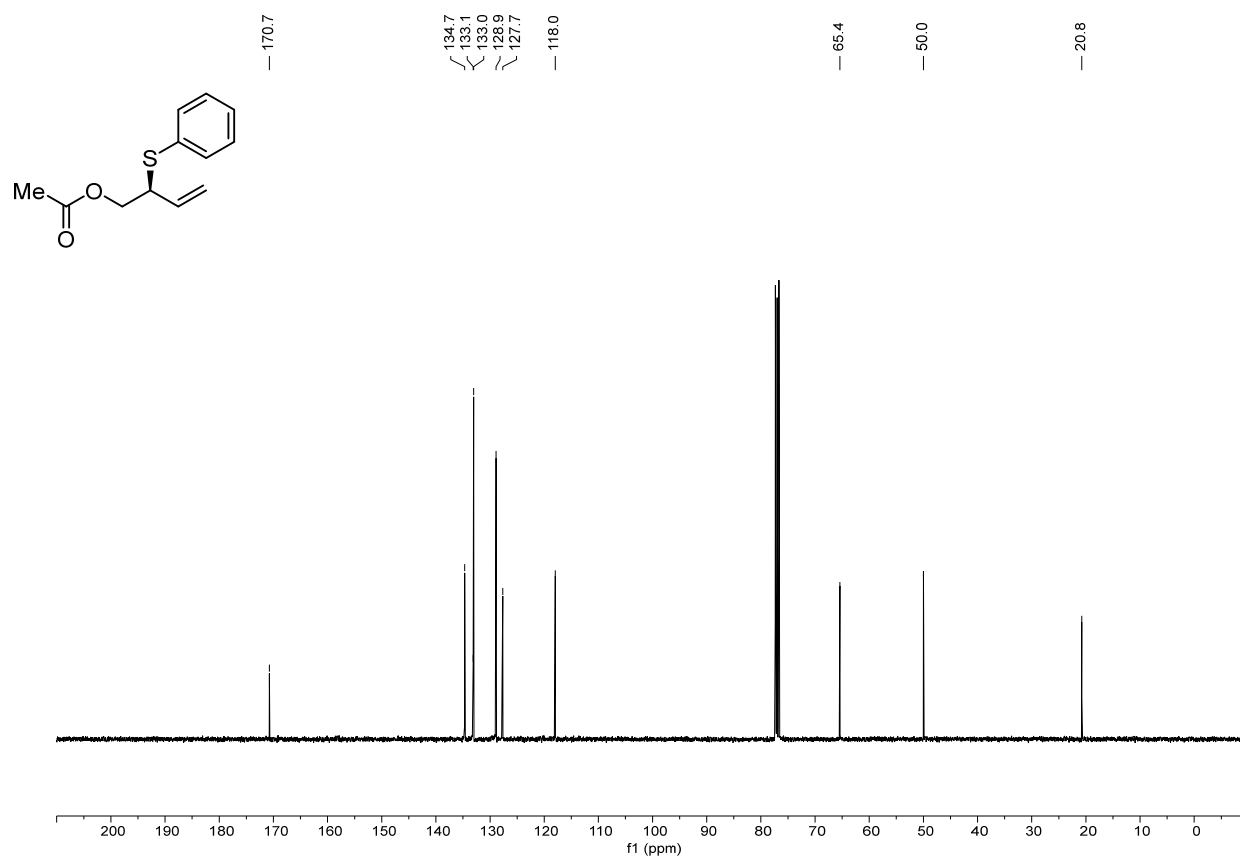



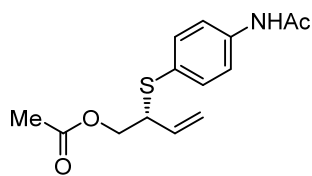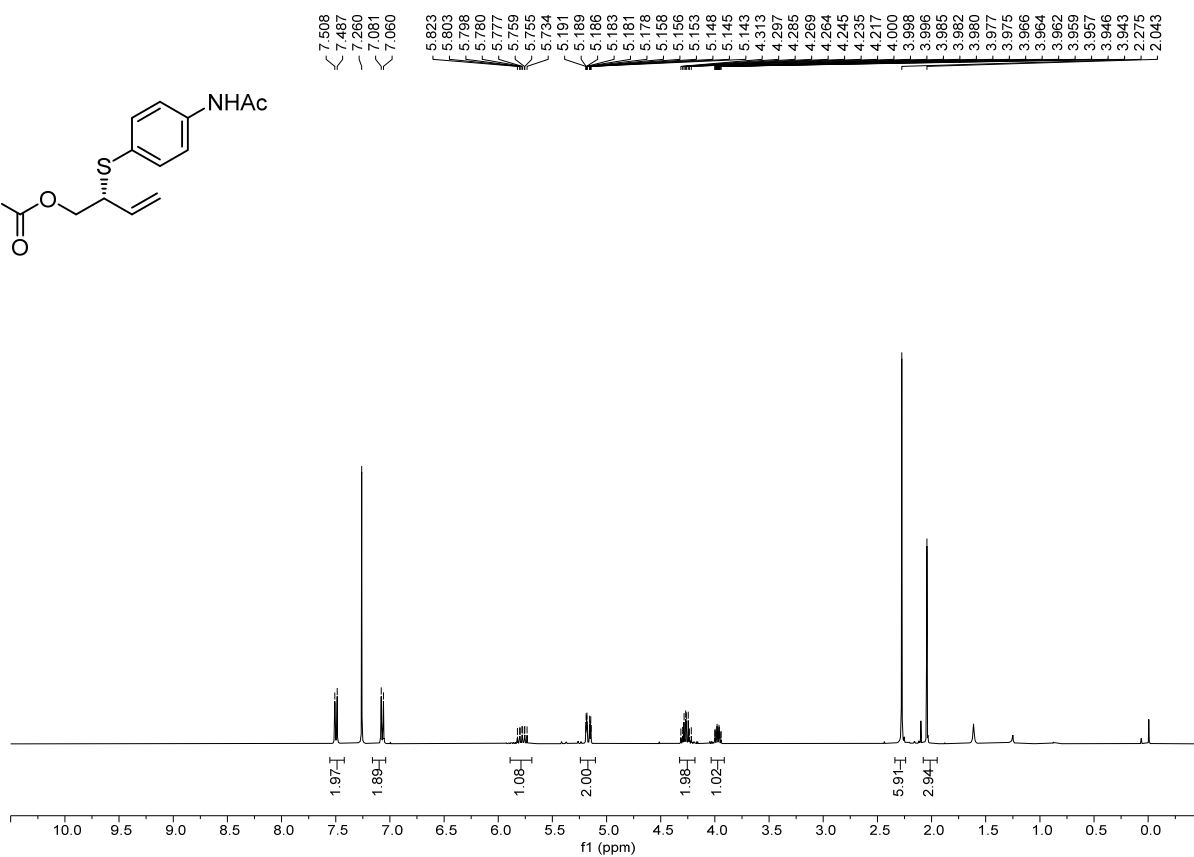

<sup>1</sup>H NMR (400 MHz, CDCl<sub>3</sub>) of **3g**

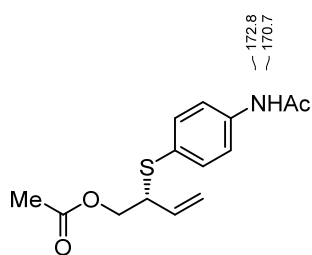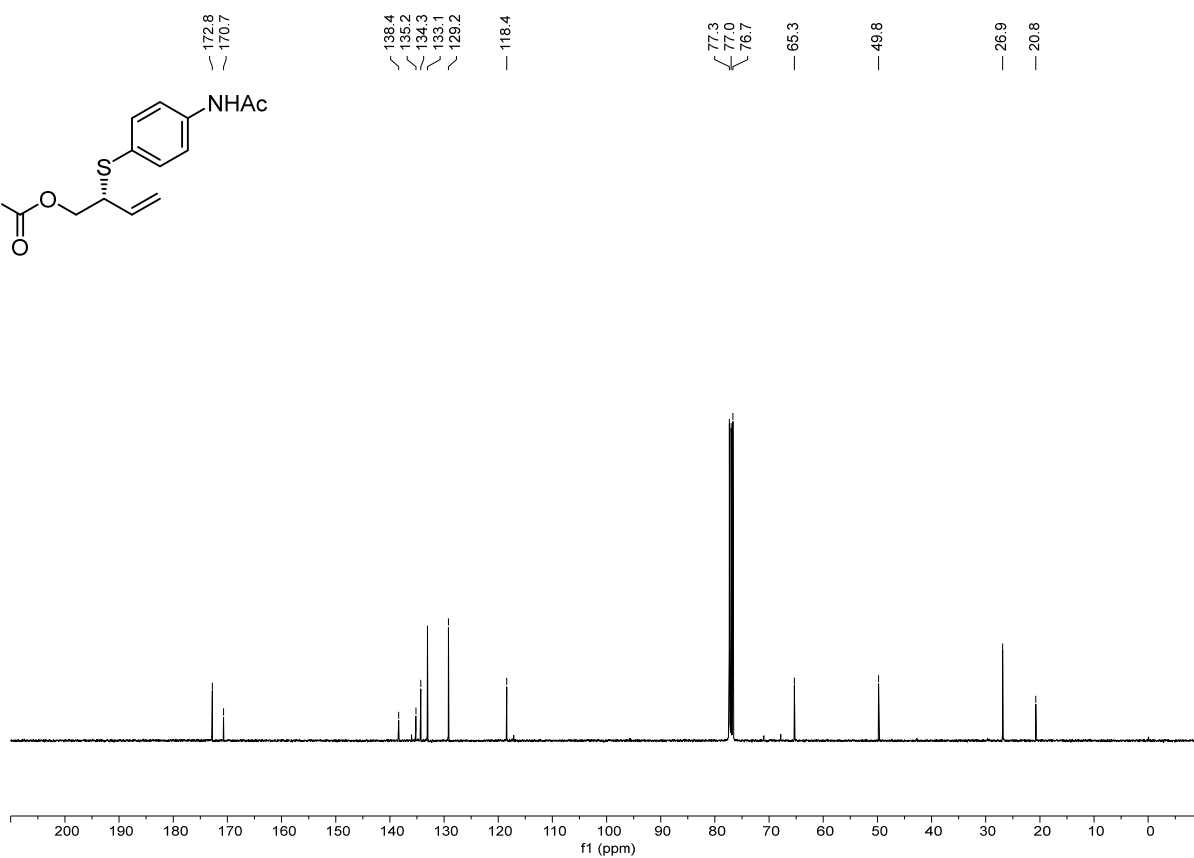

<sup>13</sup>C NMR (101 MHz, CDCl<sub>3</sub>) of **3g**

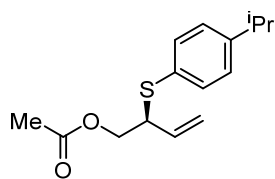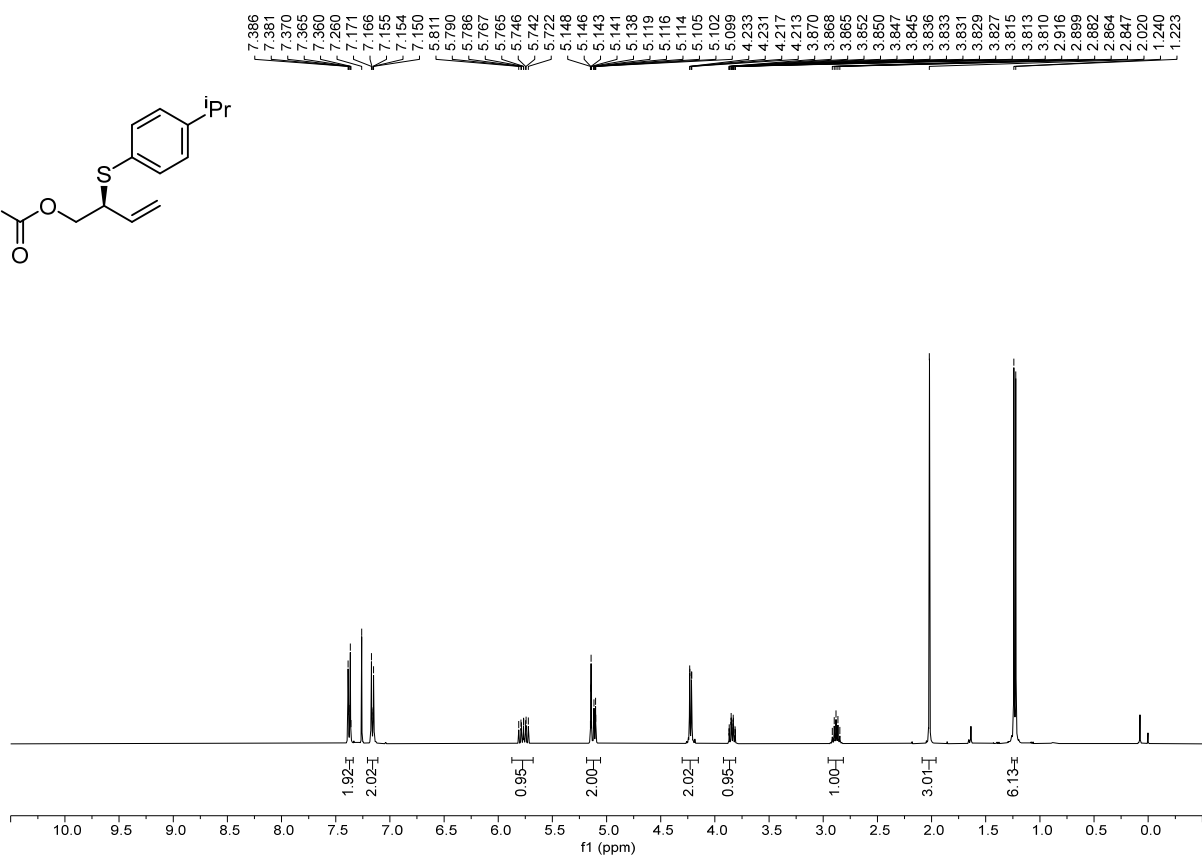

**<sup>1</sup>H NMR (400 MHz, CDCl<sub>3</sub>) of 3h**

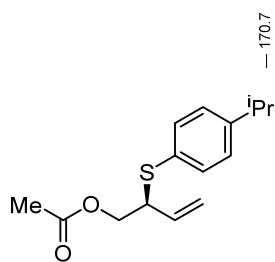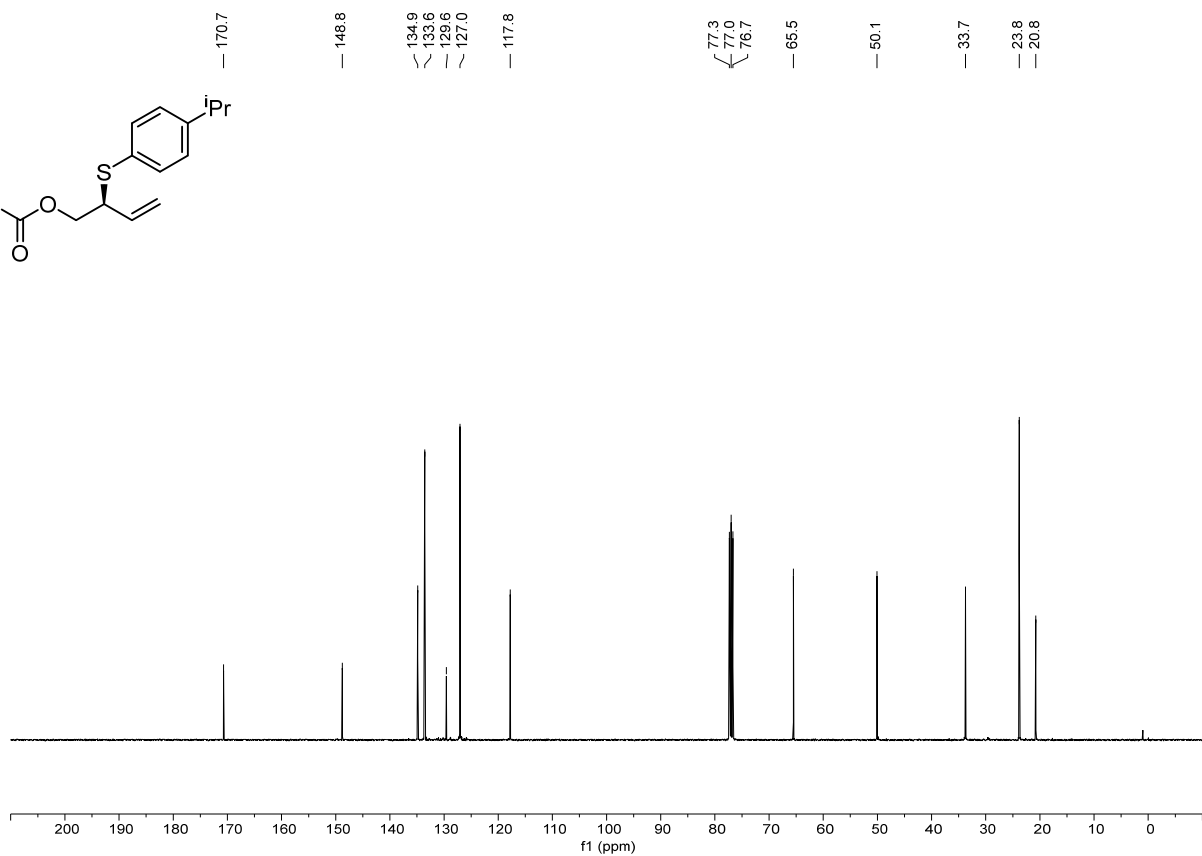

**<sup>13</sup>C NMR (101 MHz, CDCl<sub>3</sub>) of 3h**

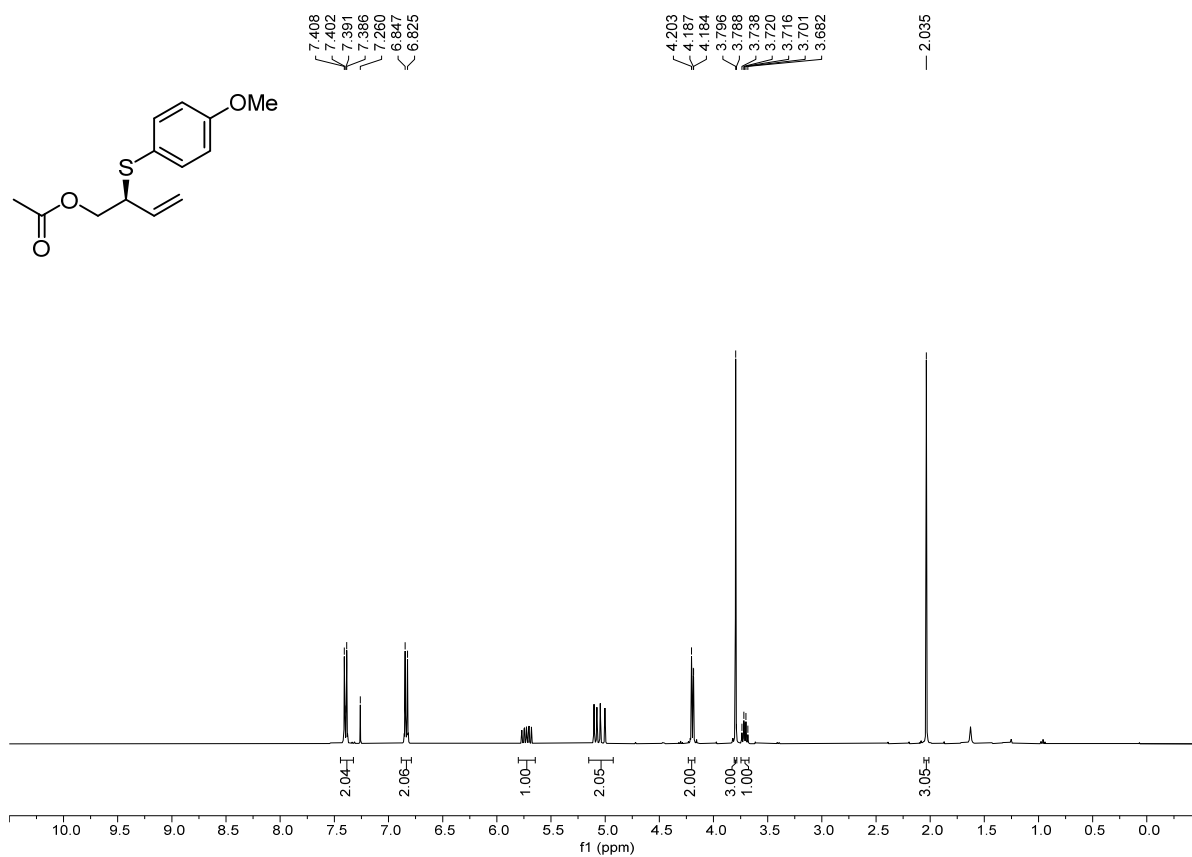

<sup>1</sup>H NMR (400 MHz, CDCl<sub>3</sub>) of **3i**

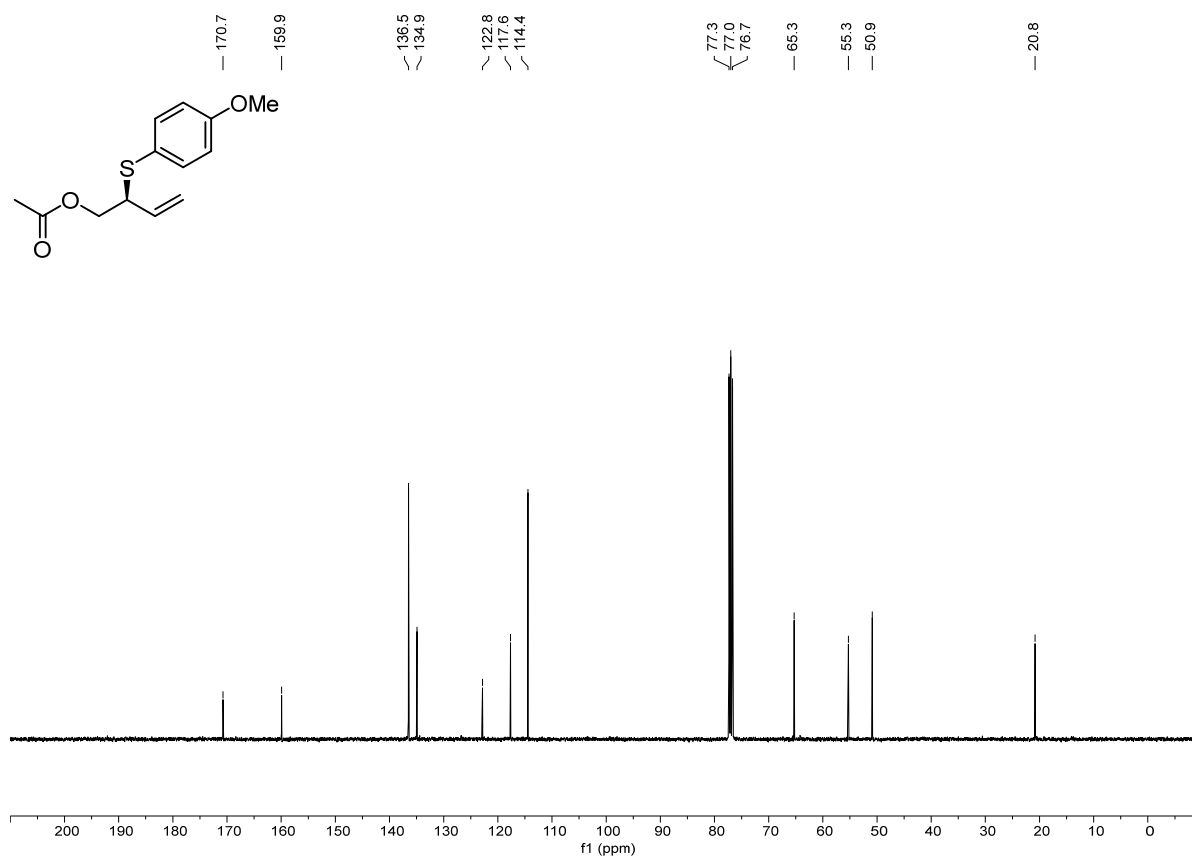

<sup>13</sup>C NMR (101 MHz, CDCl<sub>3</sub>) of **3i**

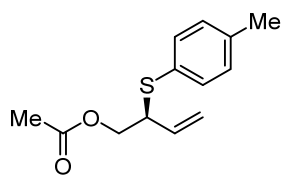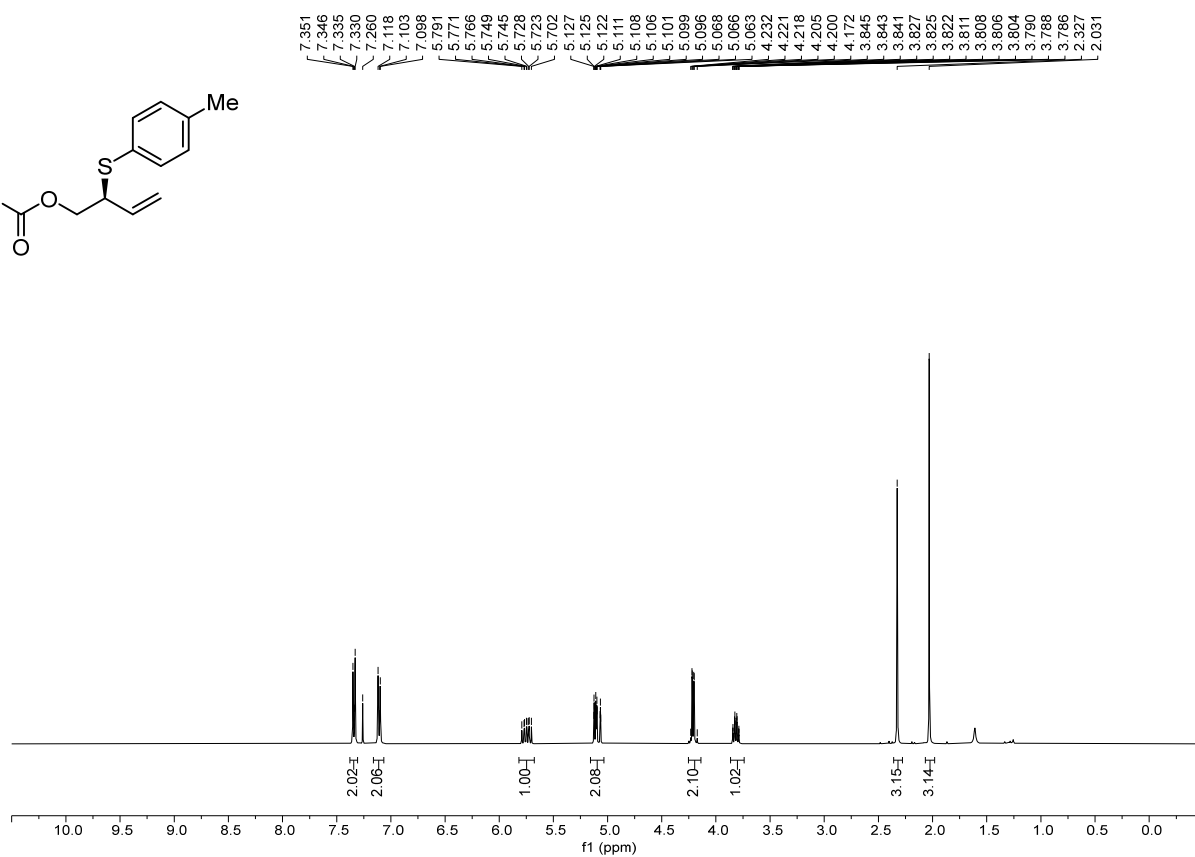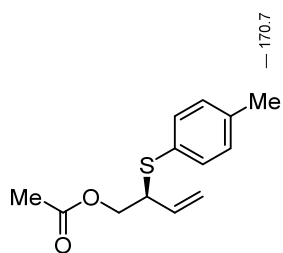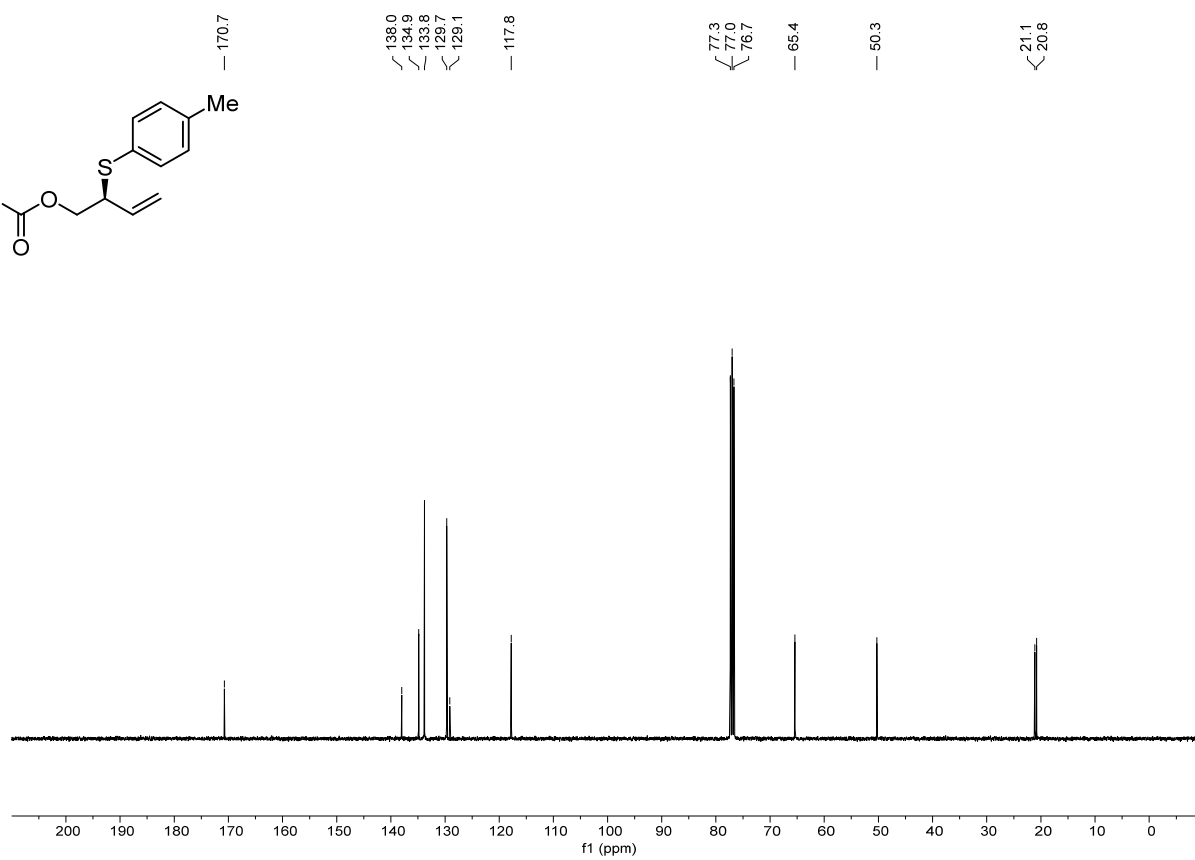

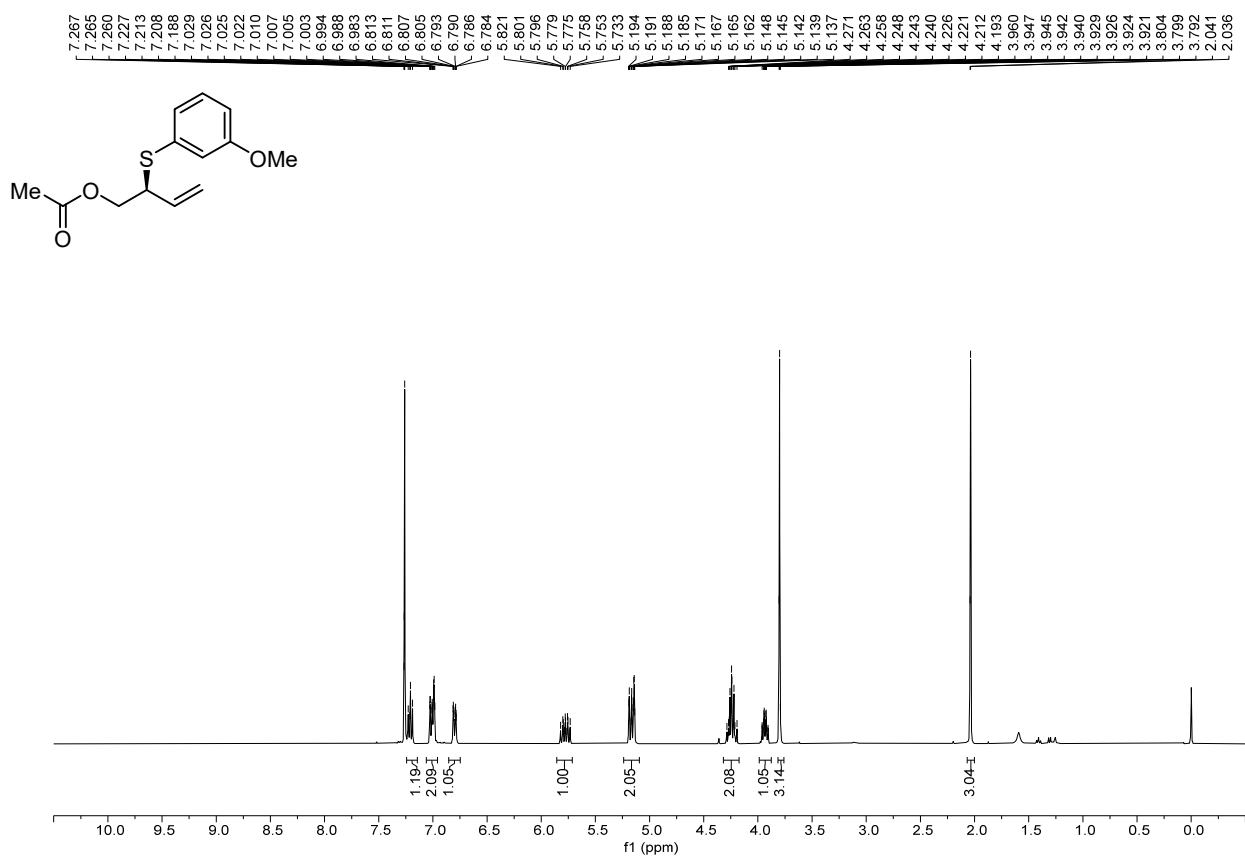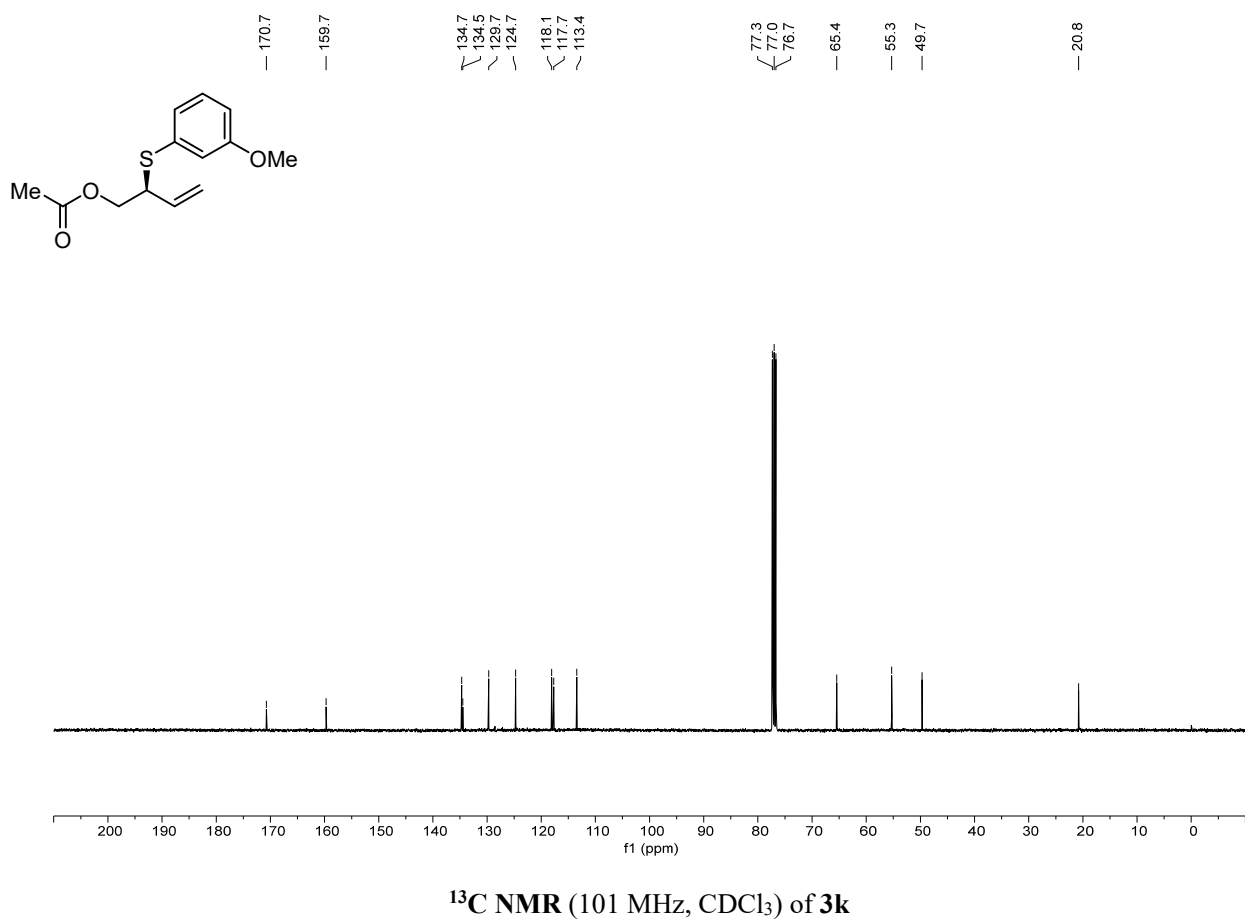

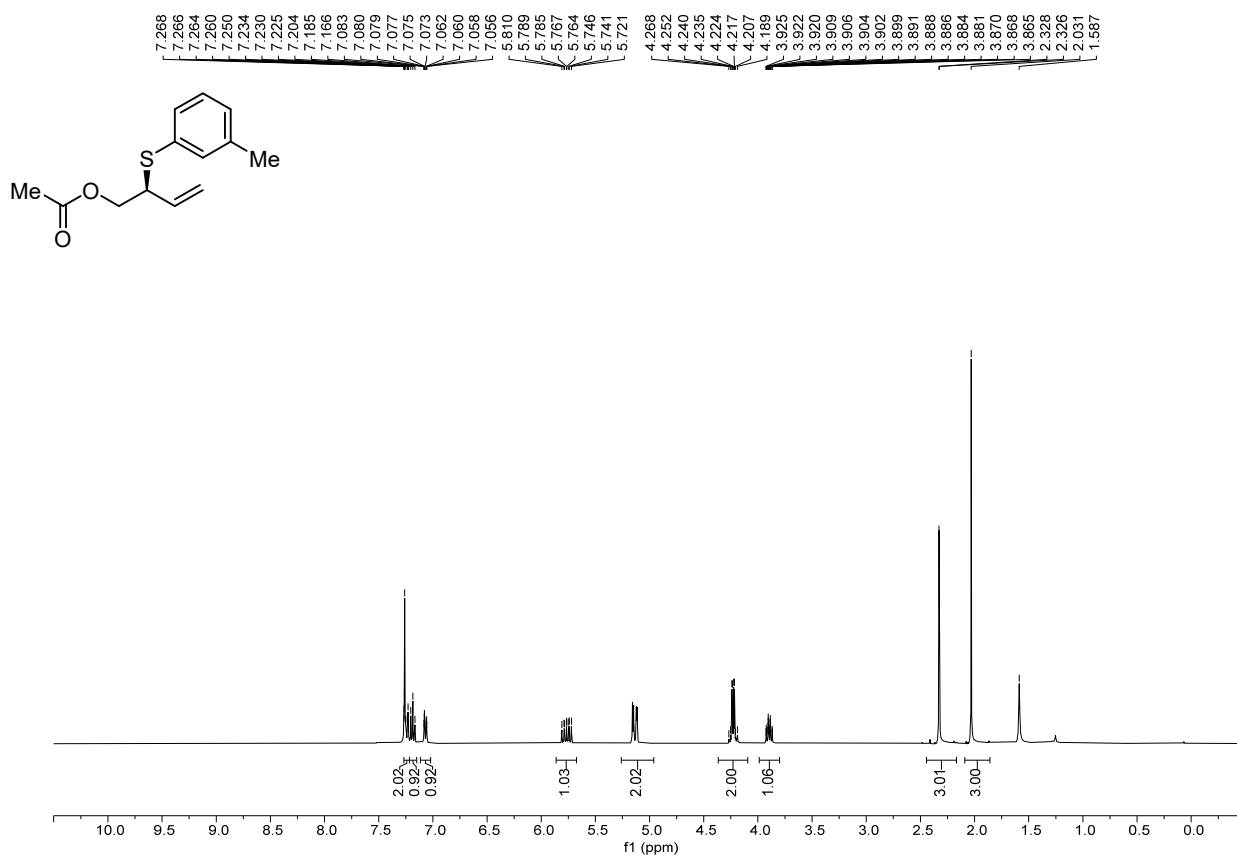

<sup>1</sup>H NMR (400 MHz, CDCl<sub>3</sub>) of **3l**

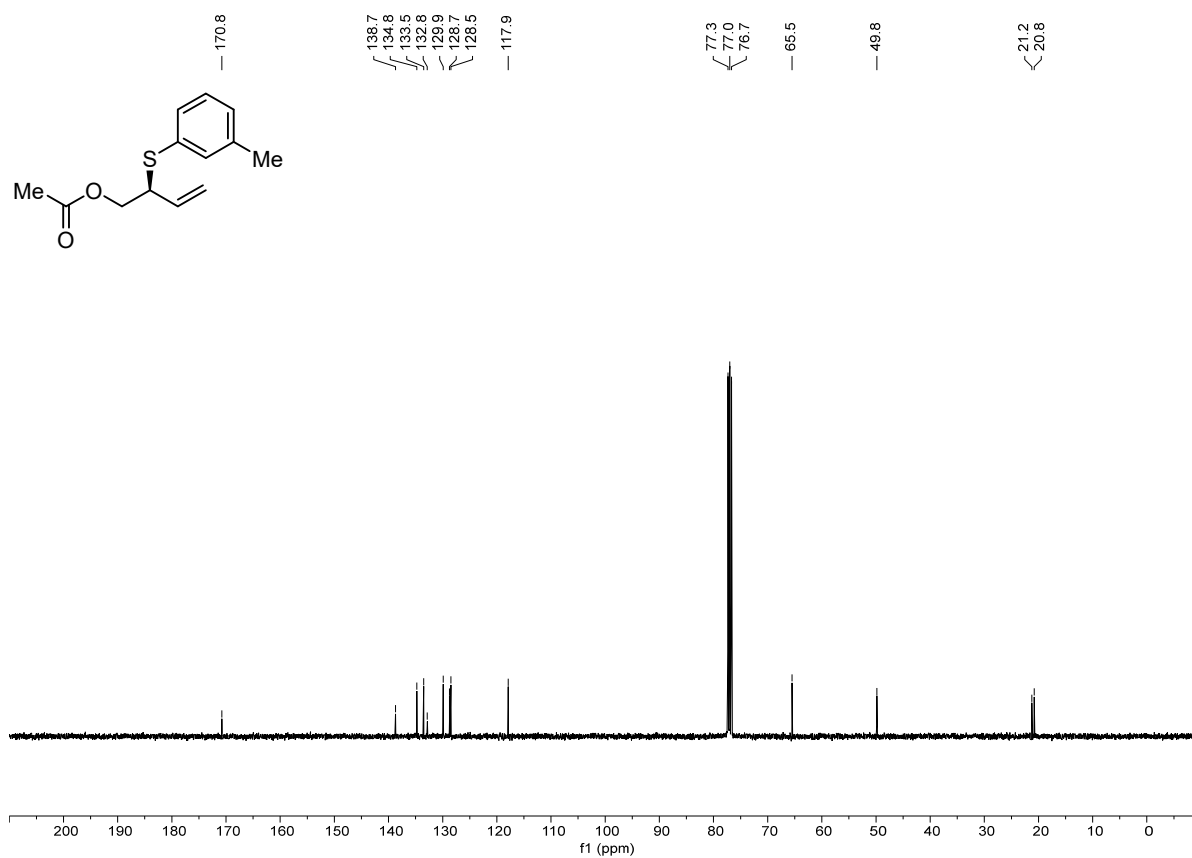

<sup>13</sup>C NMR (101 MHz, CDCl<sub>3</sub>) of **3l**

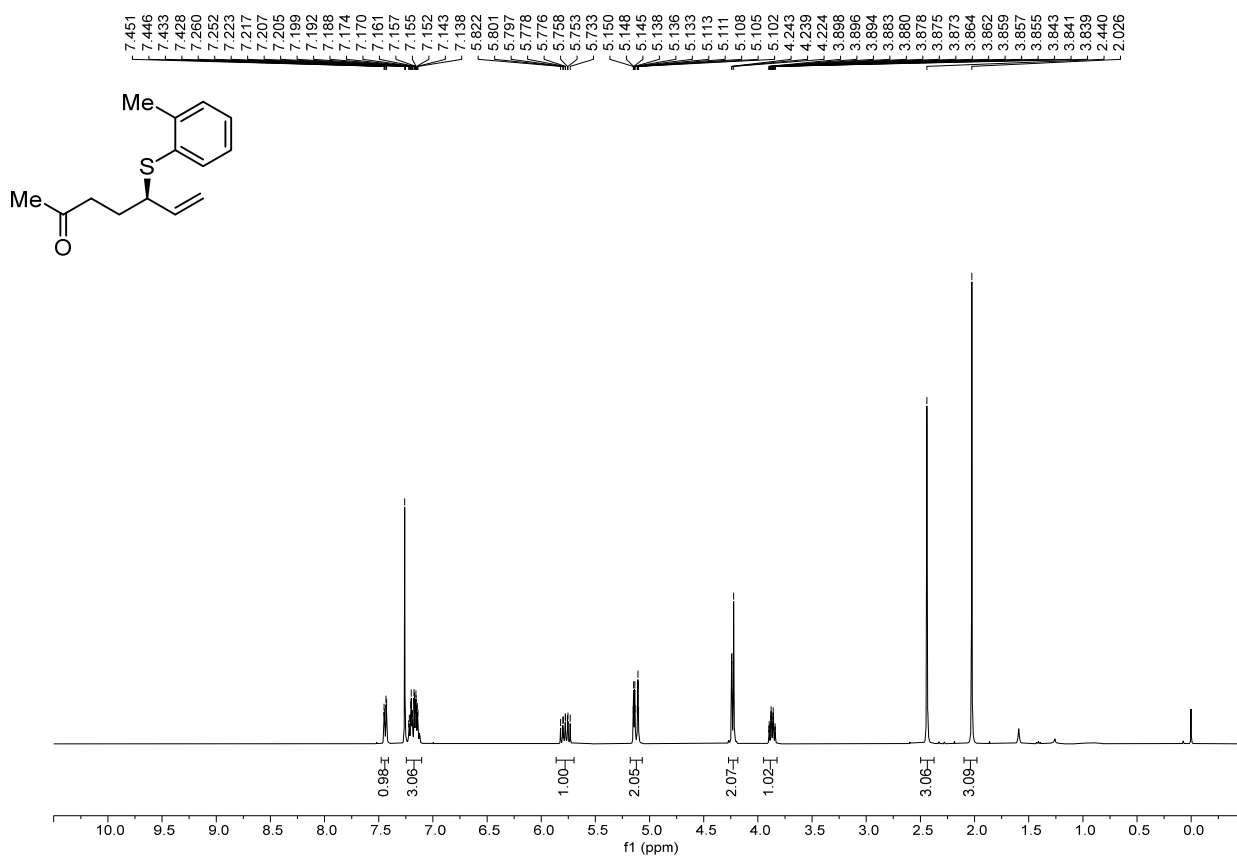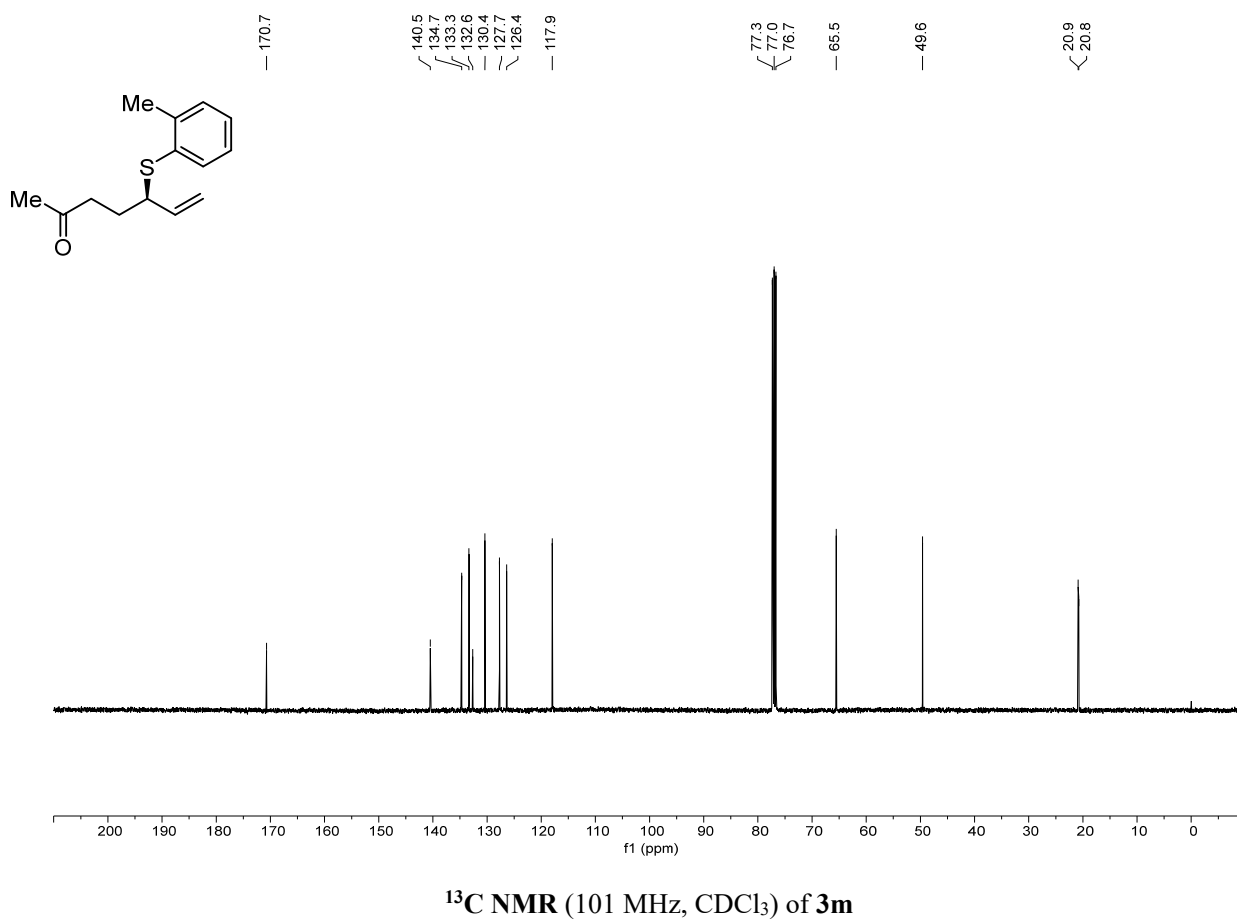

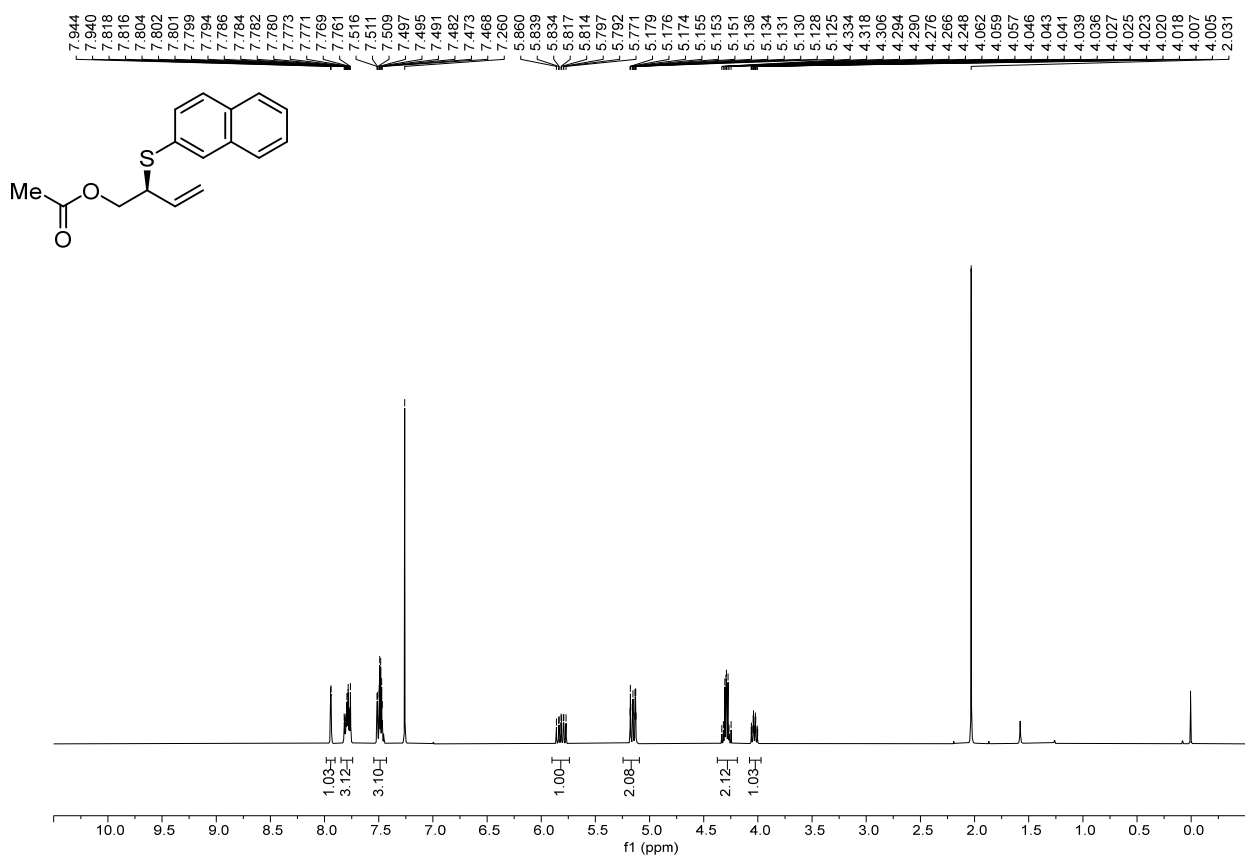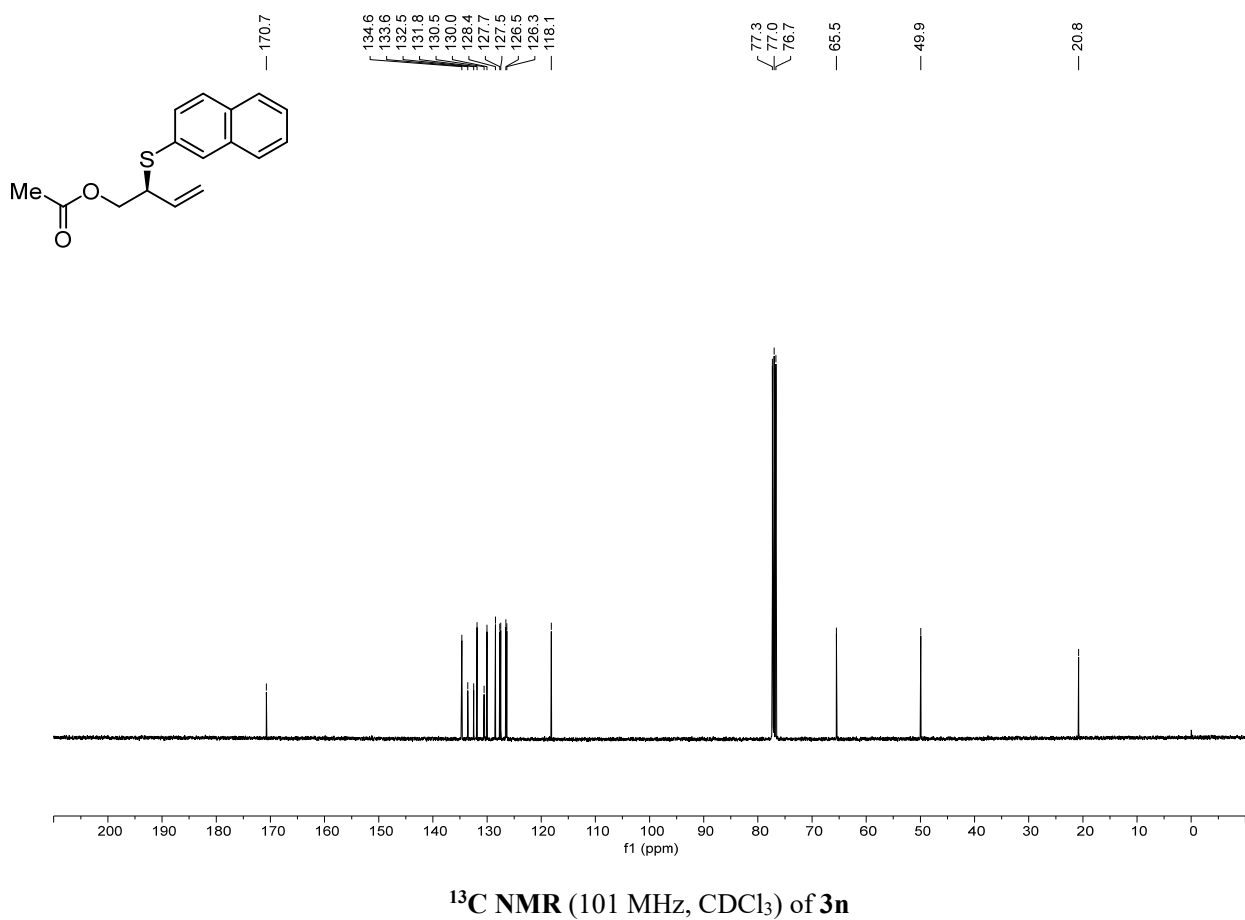



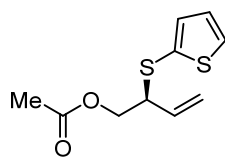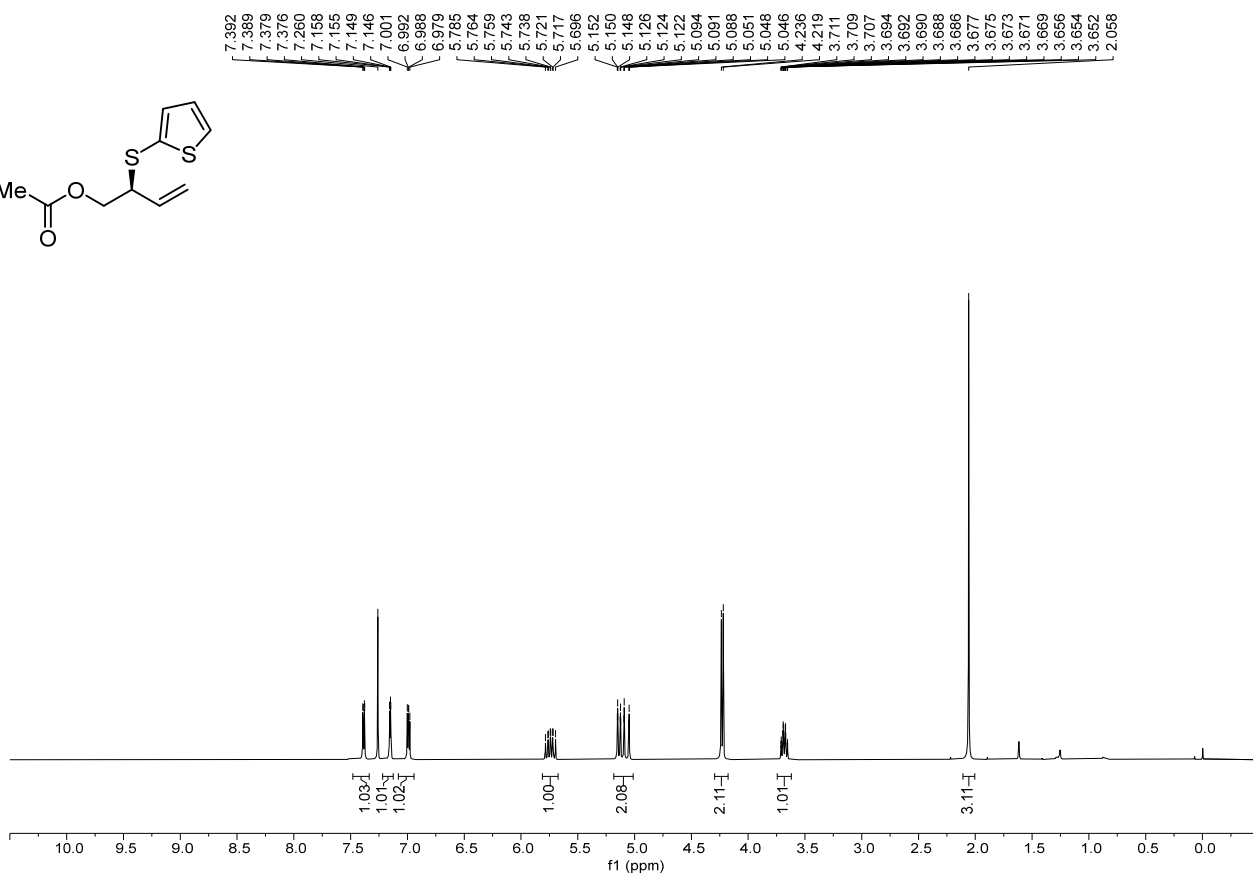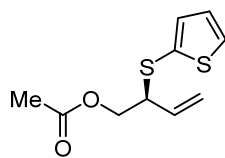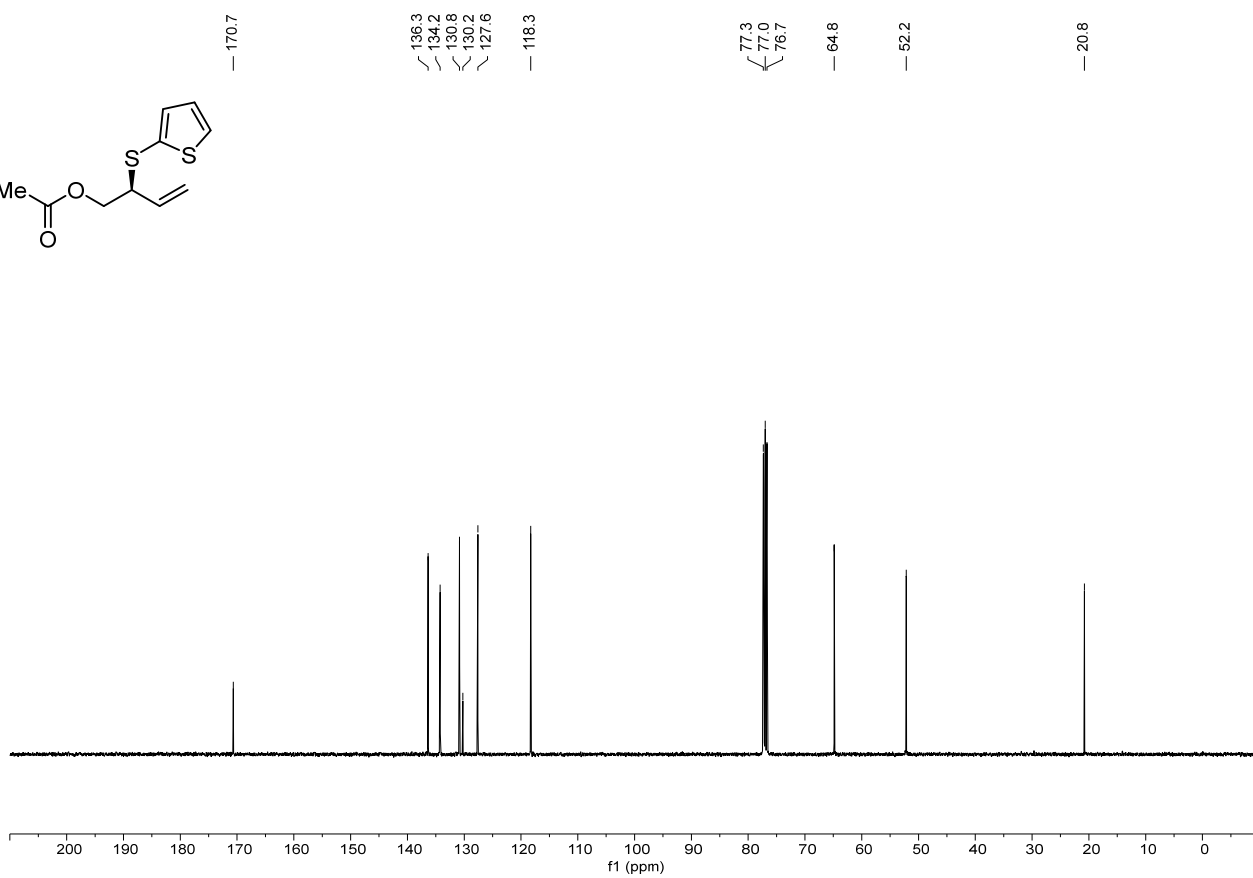

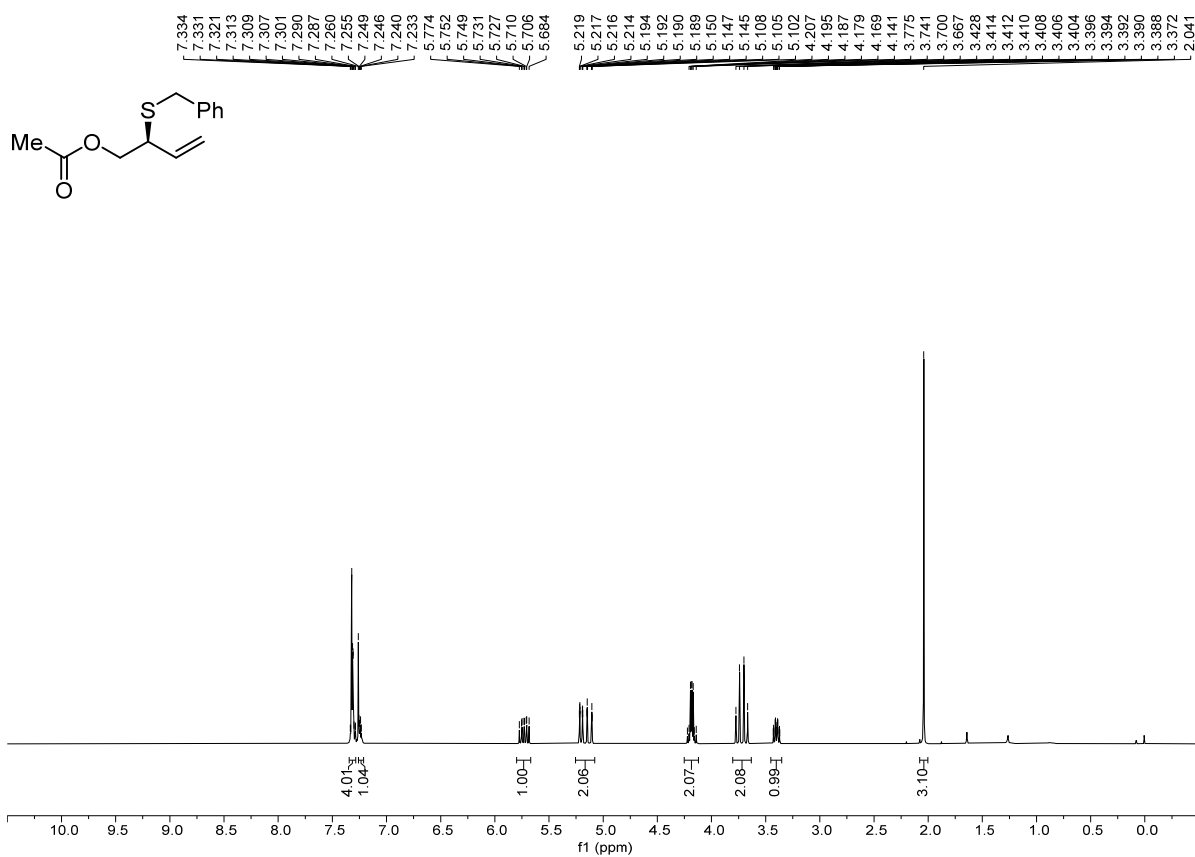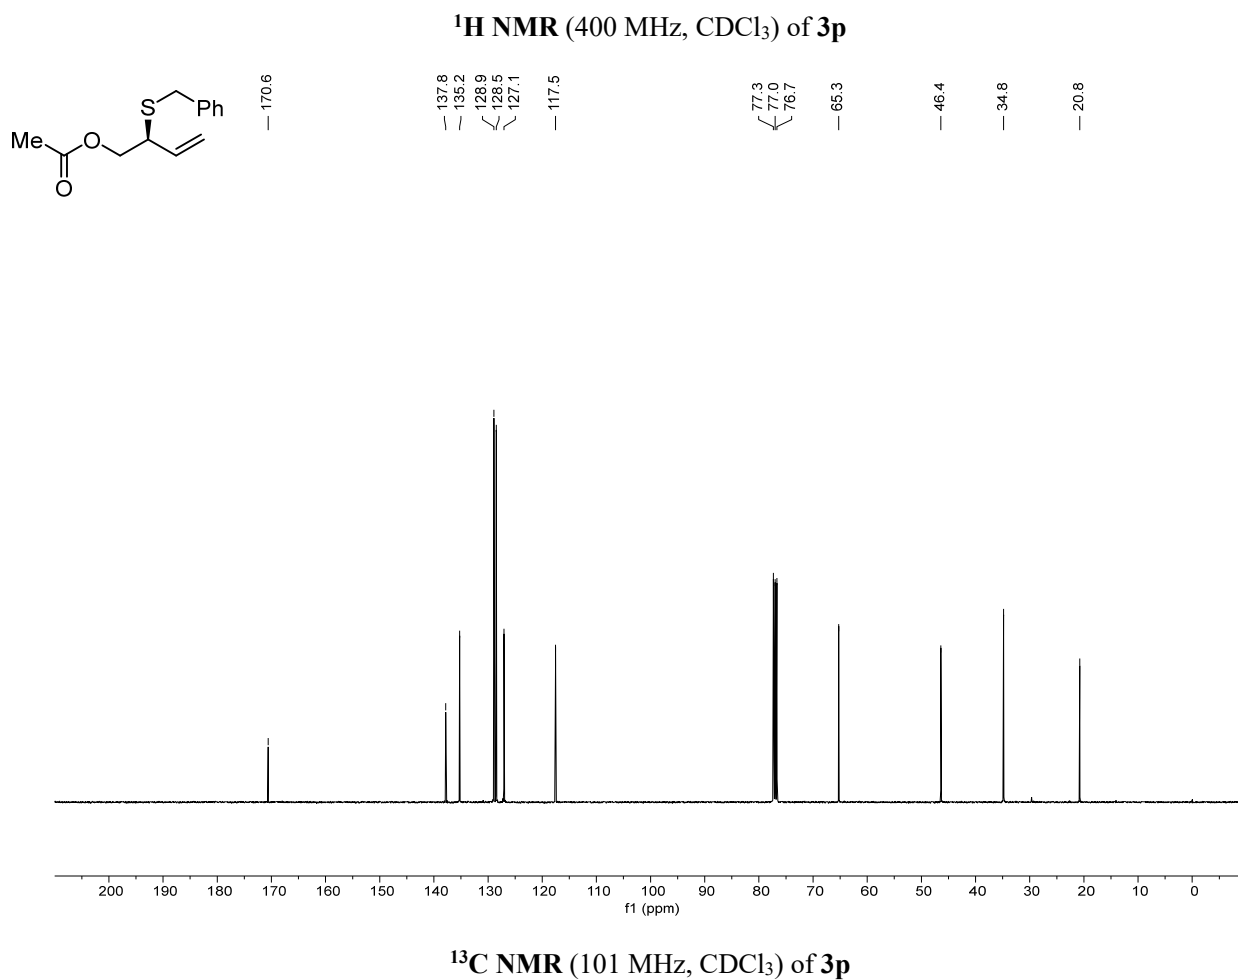

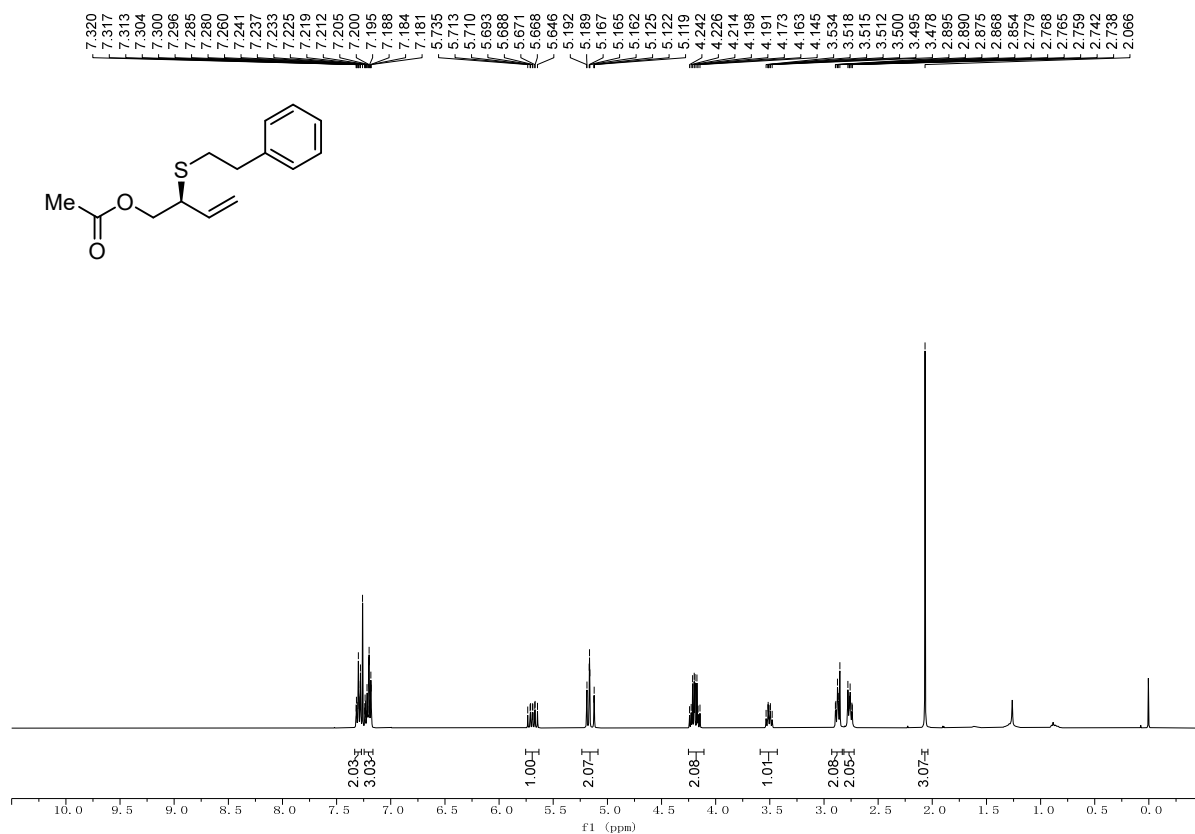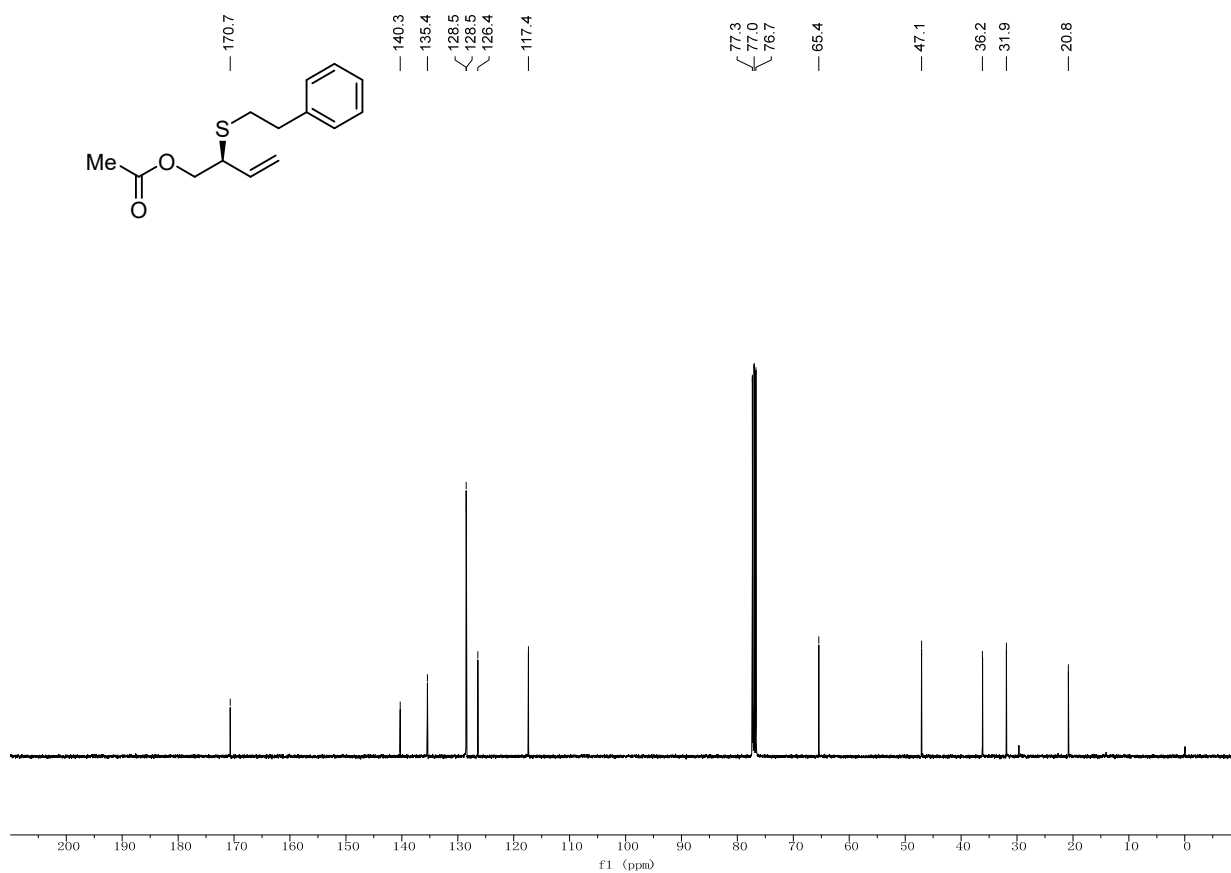

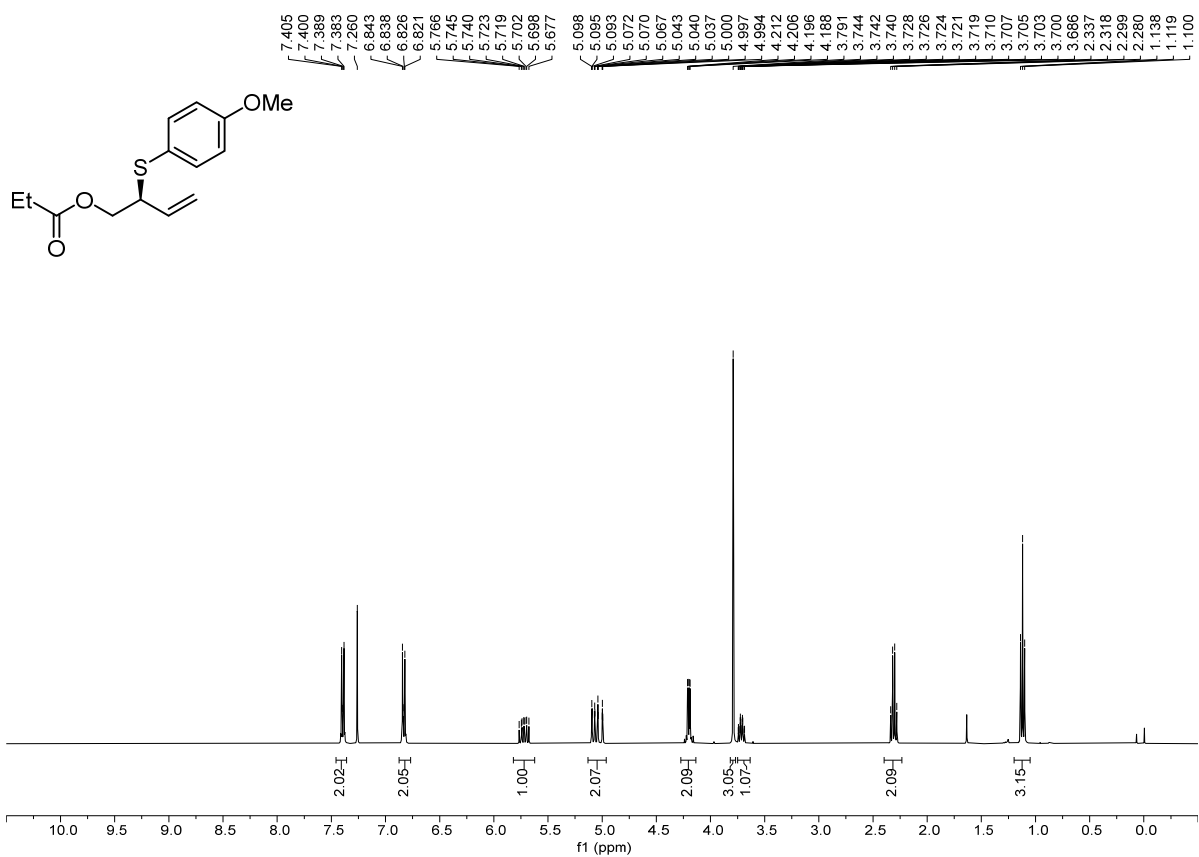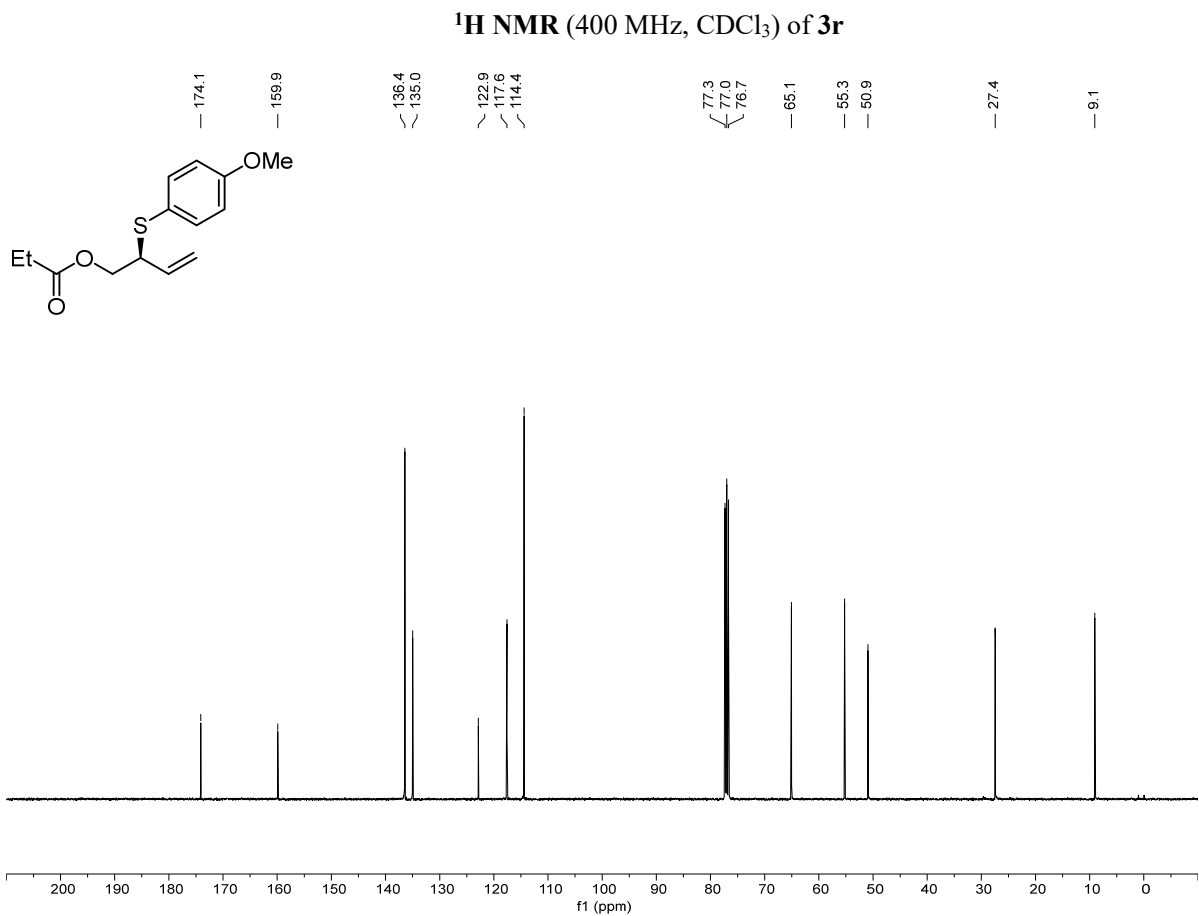

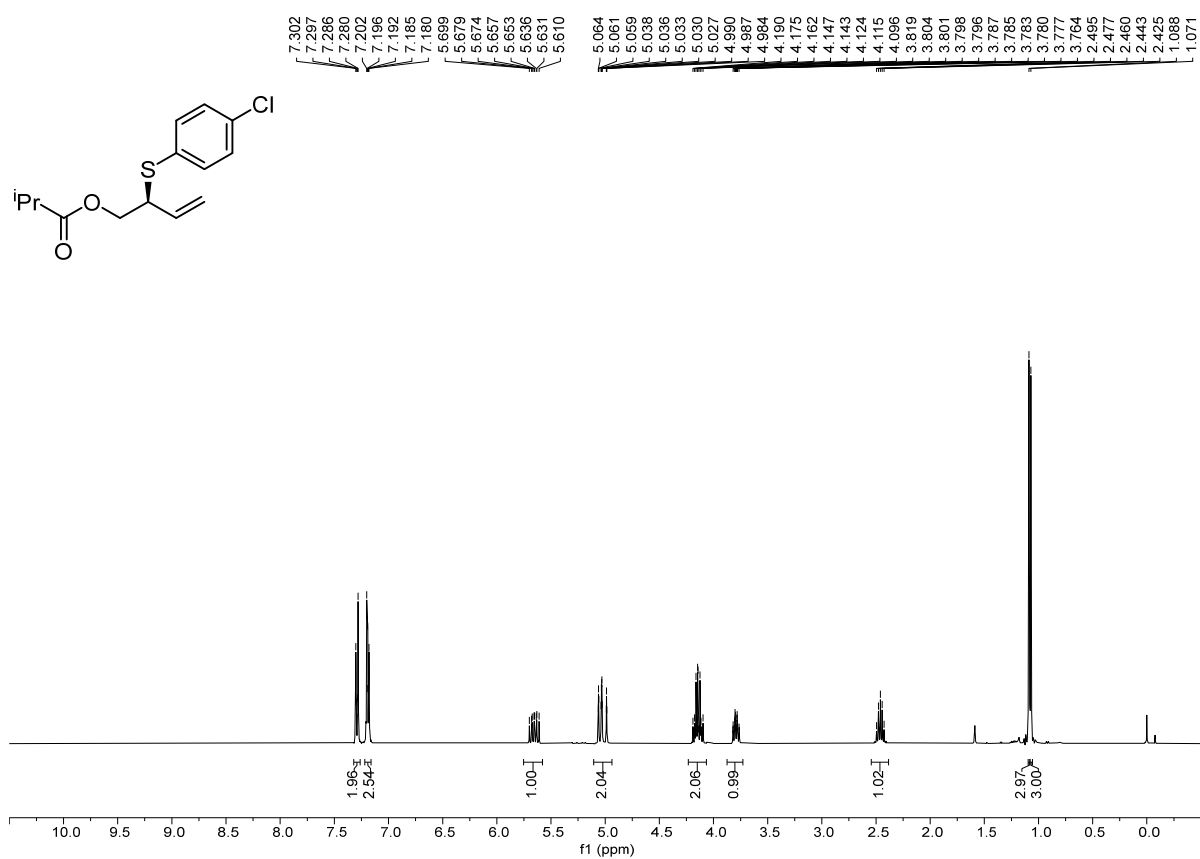

<sup>1</sup>H NMR (400 MHz, CDCl<sub>3</sub>) of **3s**

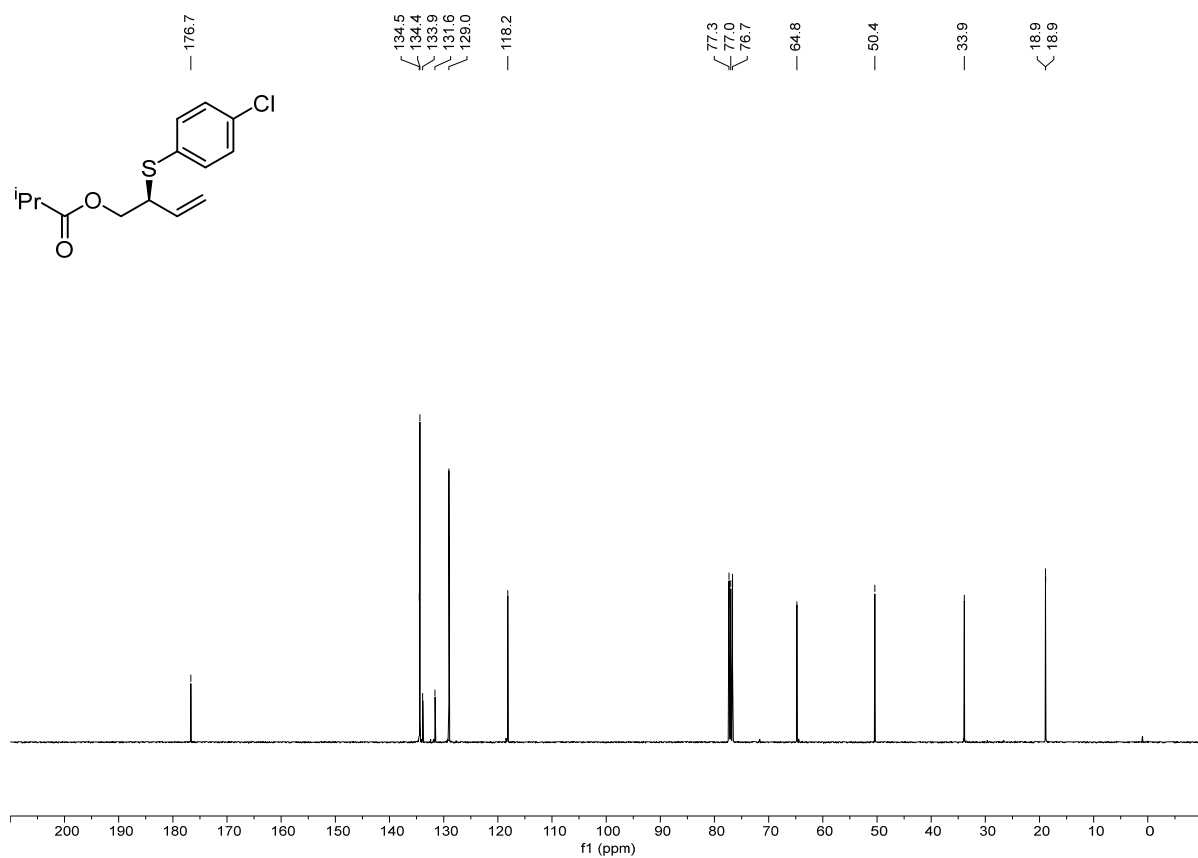

<sup>13</sup>C NMR (101 MHz, CDCl<sub>3</sub>) of **3s**

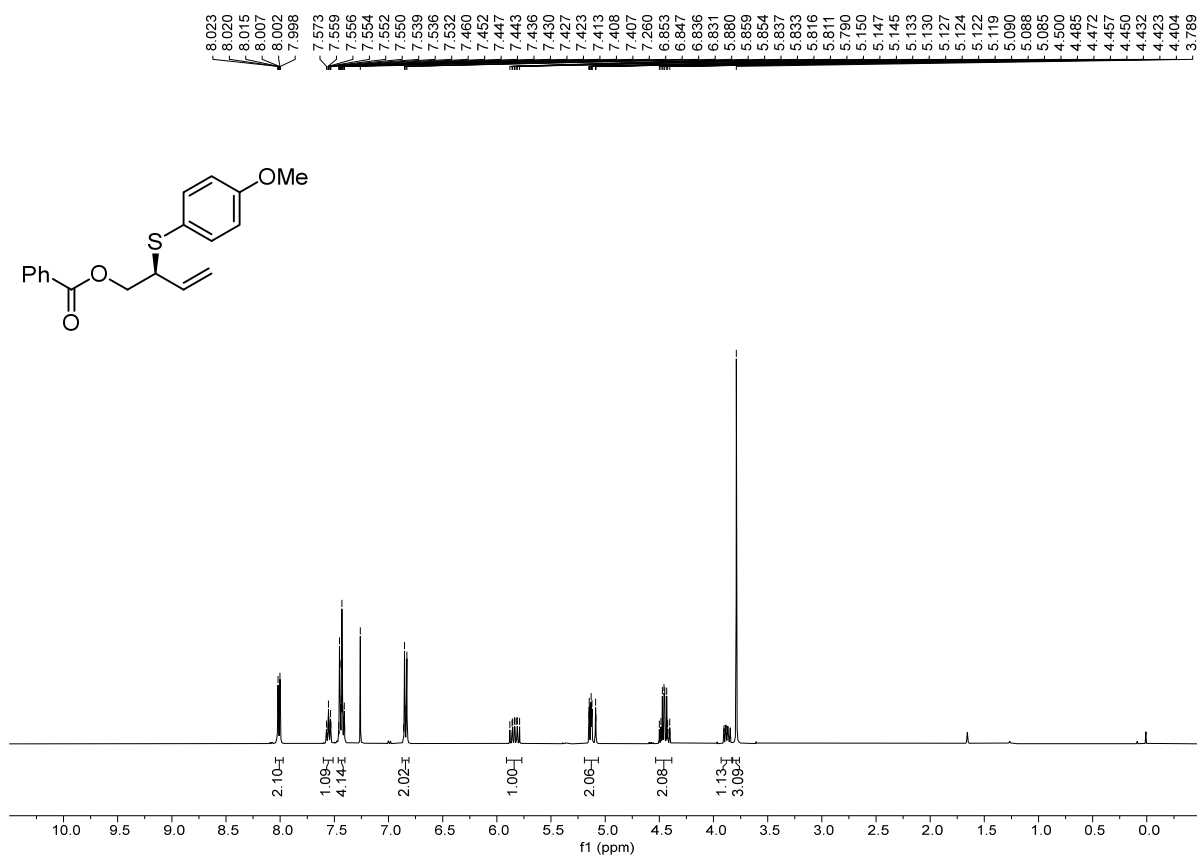

<sup>1</sup>H NMR (400 MHz, CDCl<sub>3</sub>) of 3t

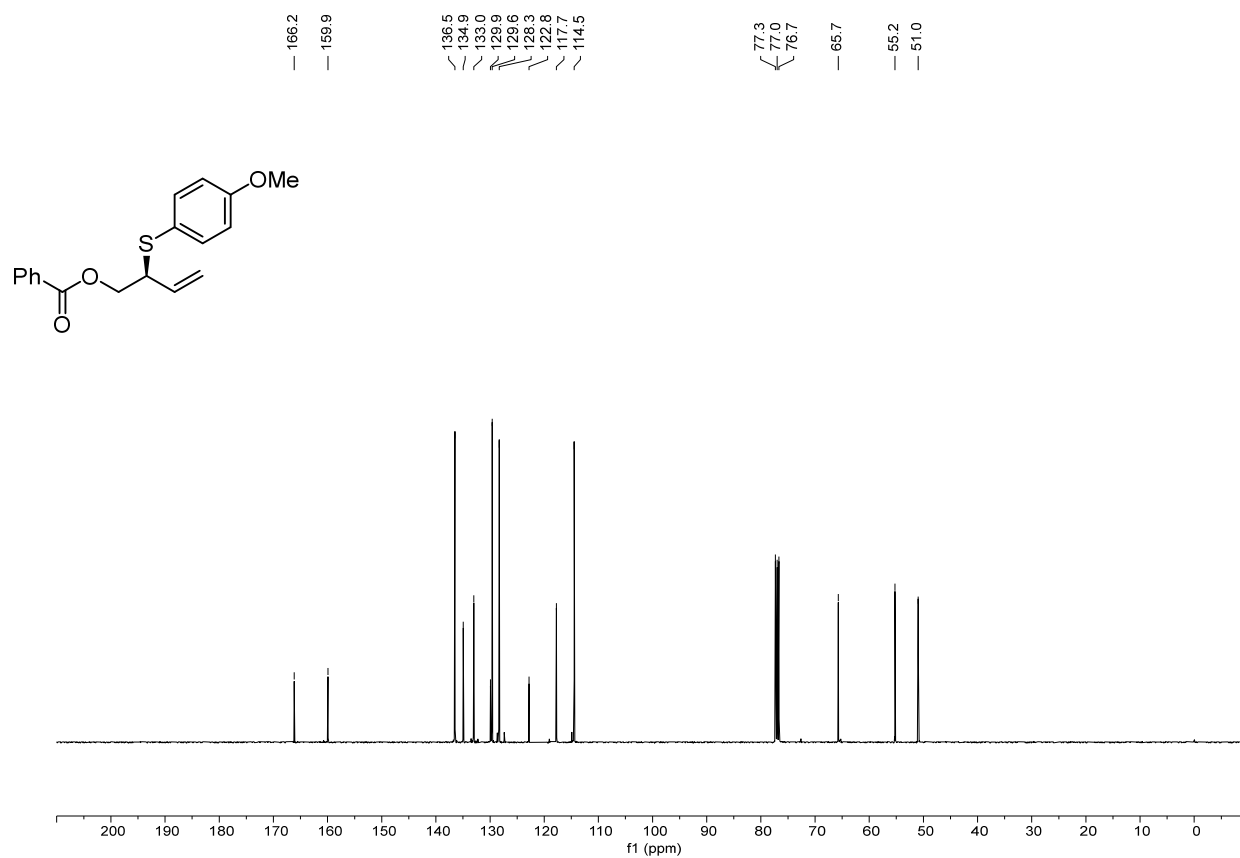

<sup>13</sup>C NMR (101 MHz, CDCl<sub>3</sub>) of 3t

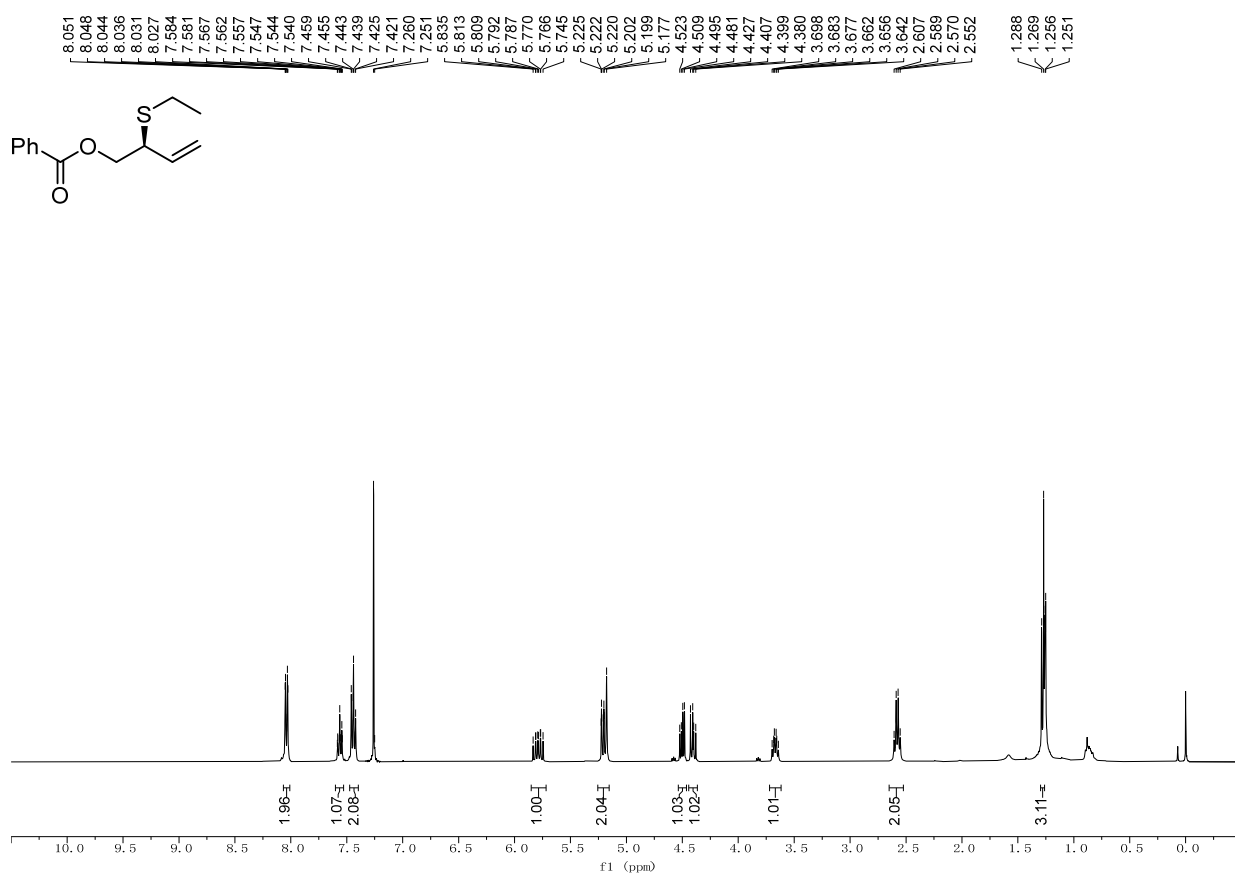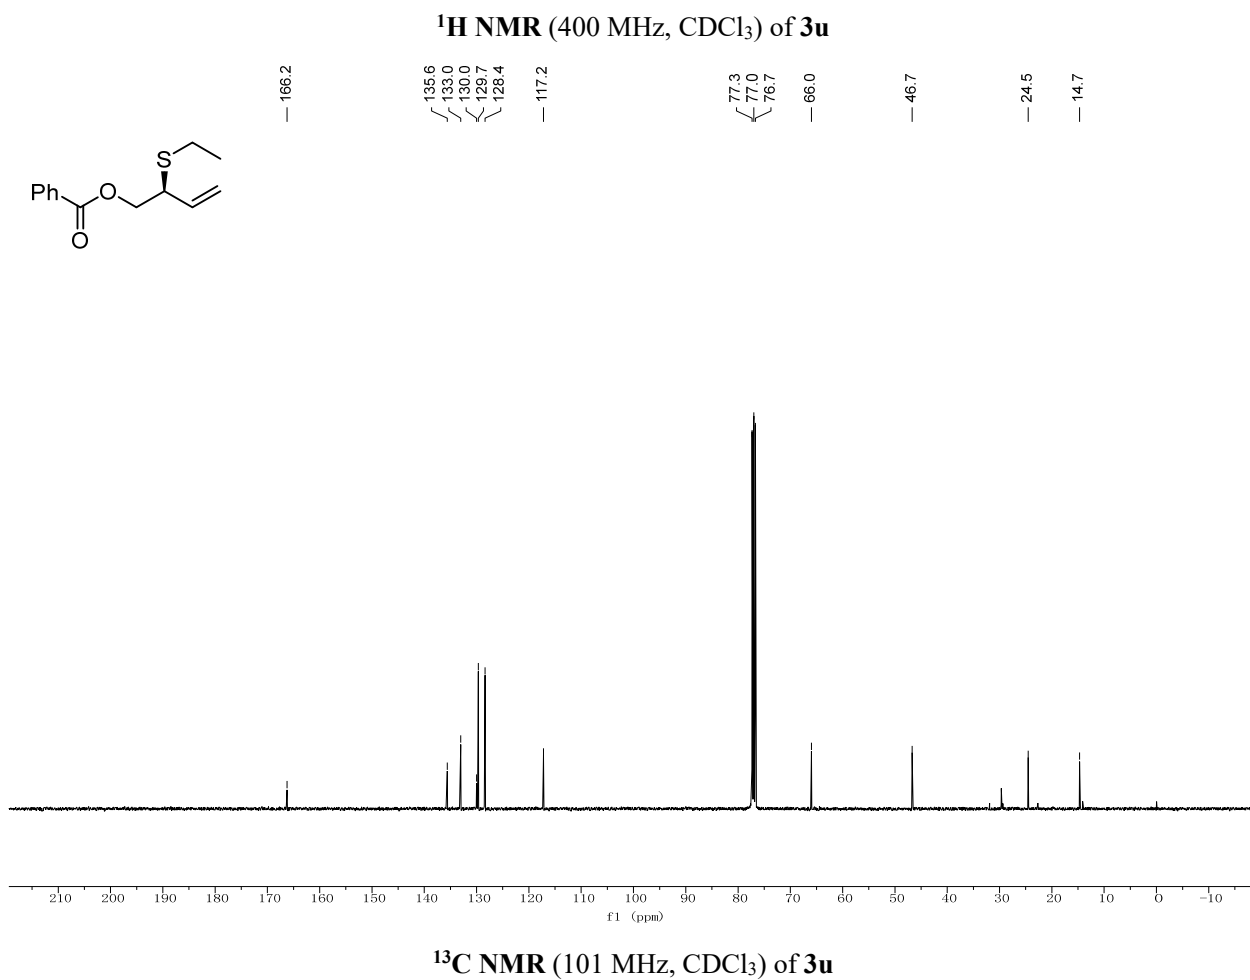

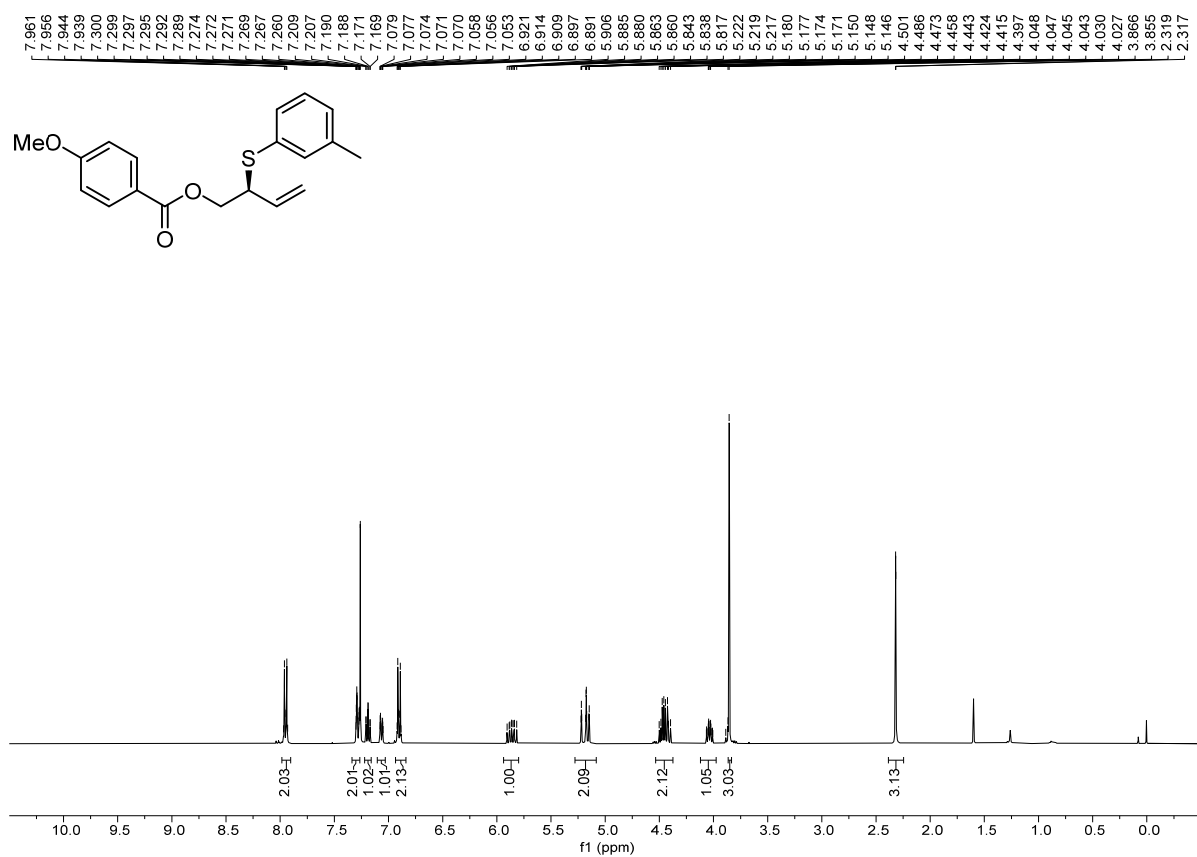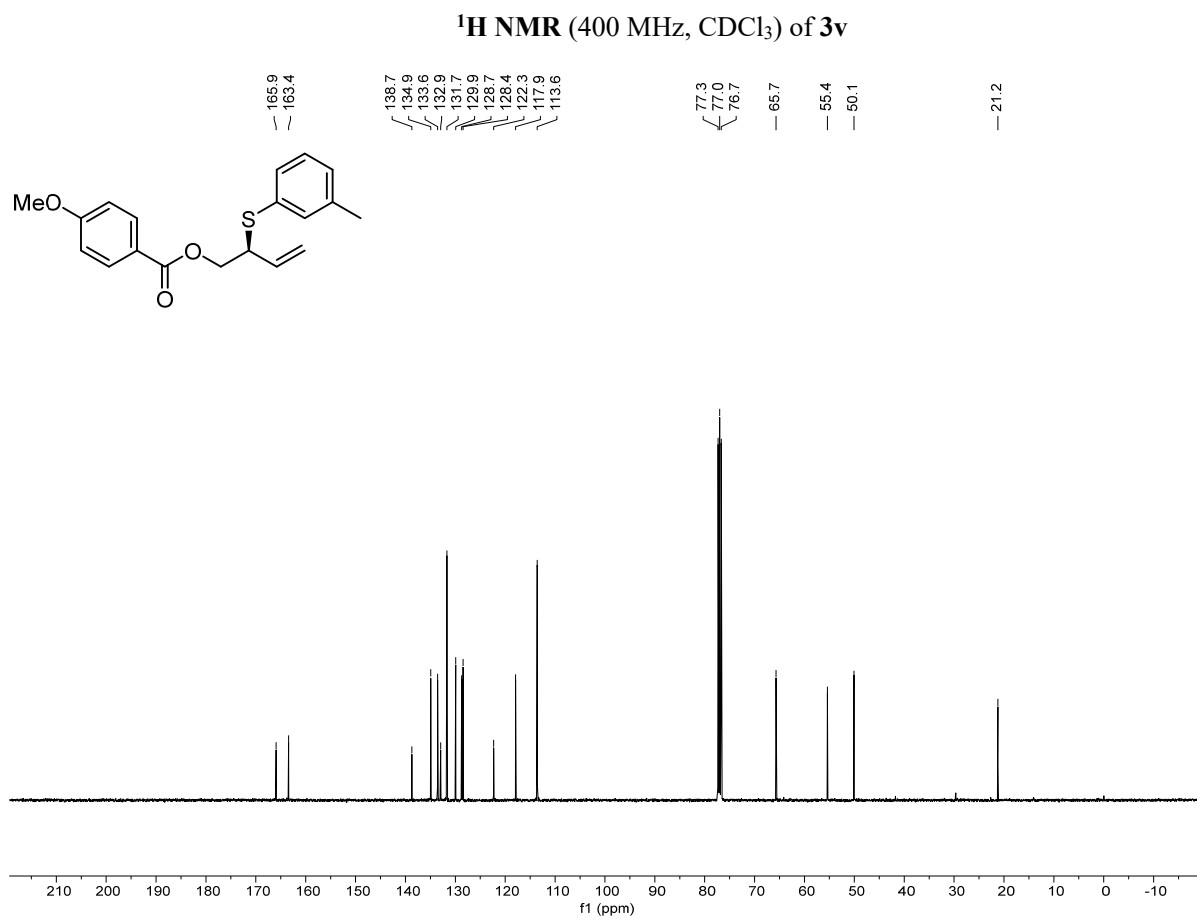



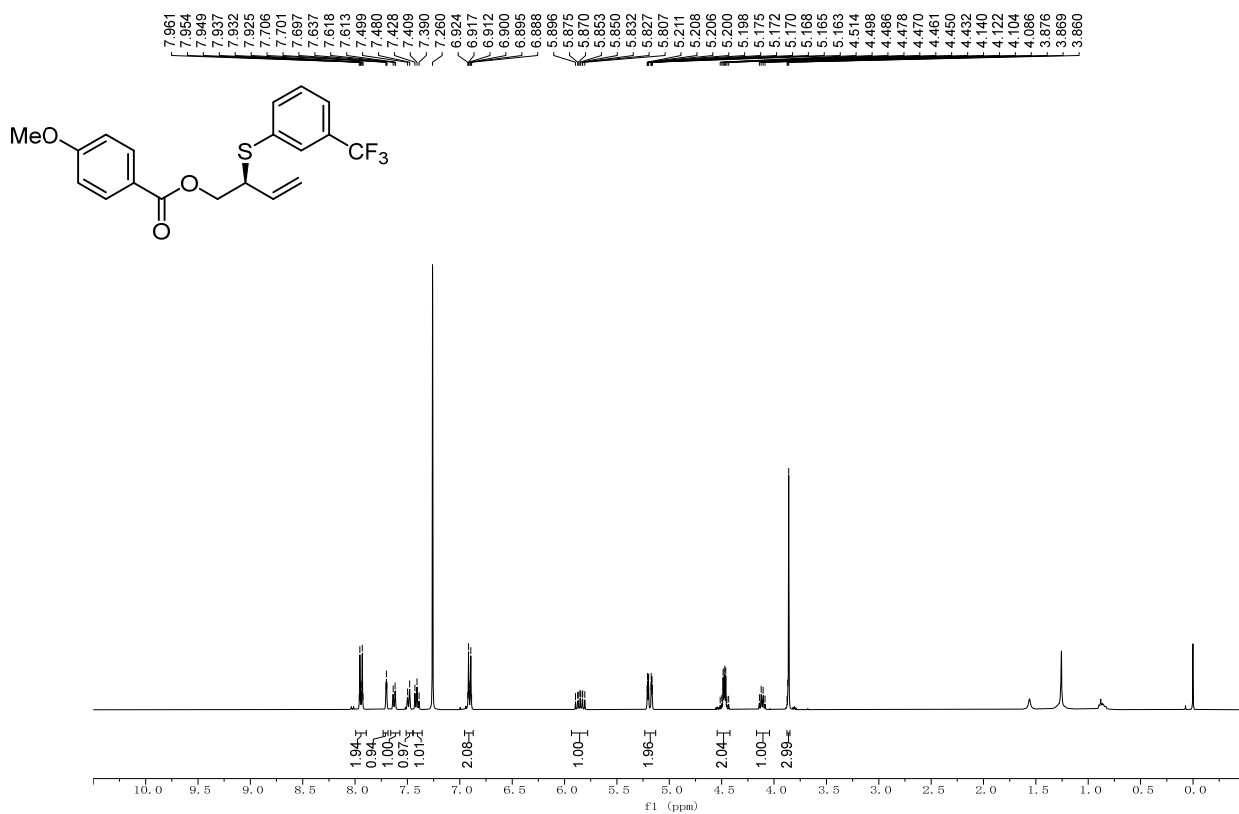

$^1\text{H}$  NMR (400 MHz,  $\text{CDCl}_3$ ) of **3w**

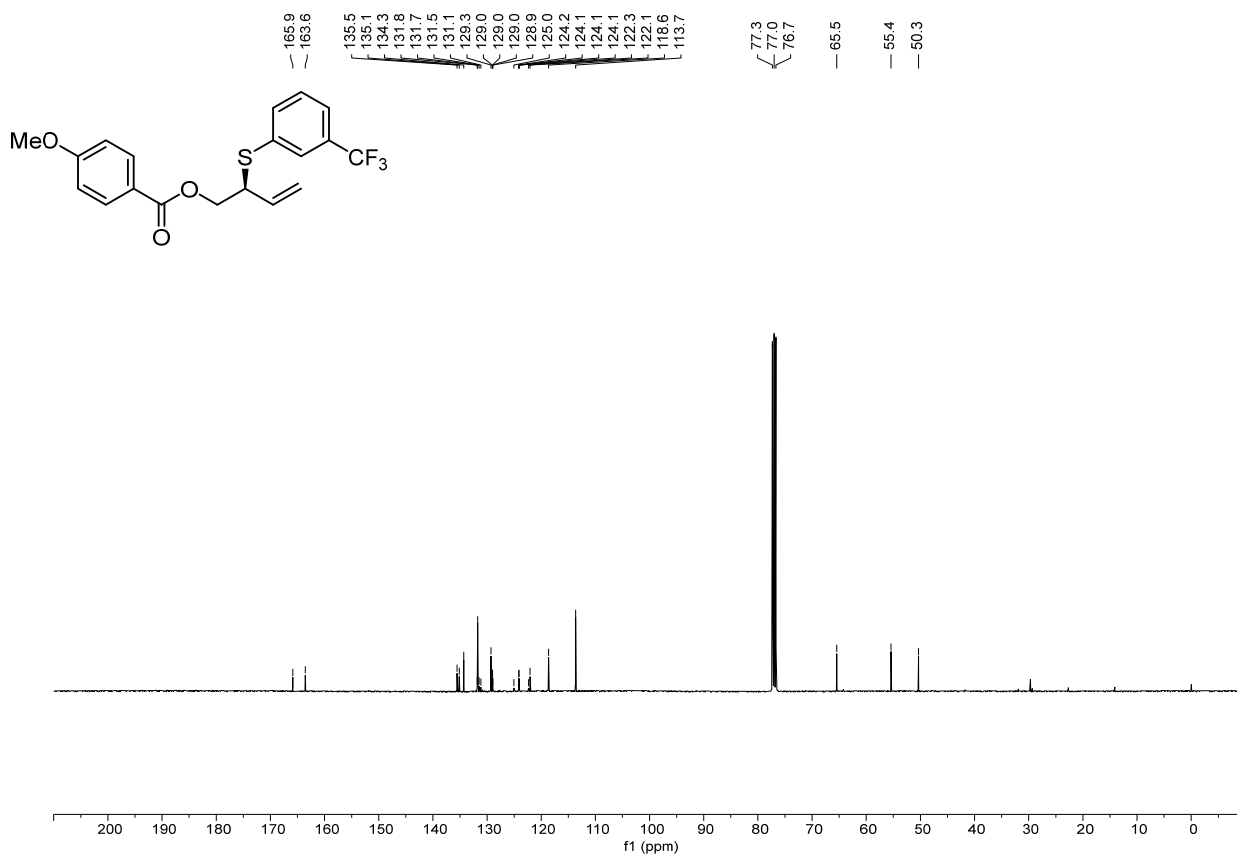

$^{13}\text{C}$  NMR (101 MHz,  $\text{CDCl}_3$ ) of **3w**

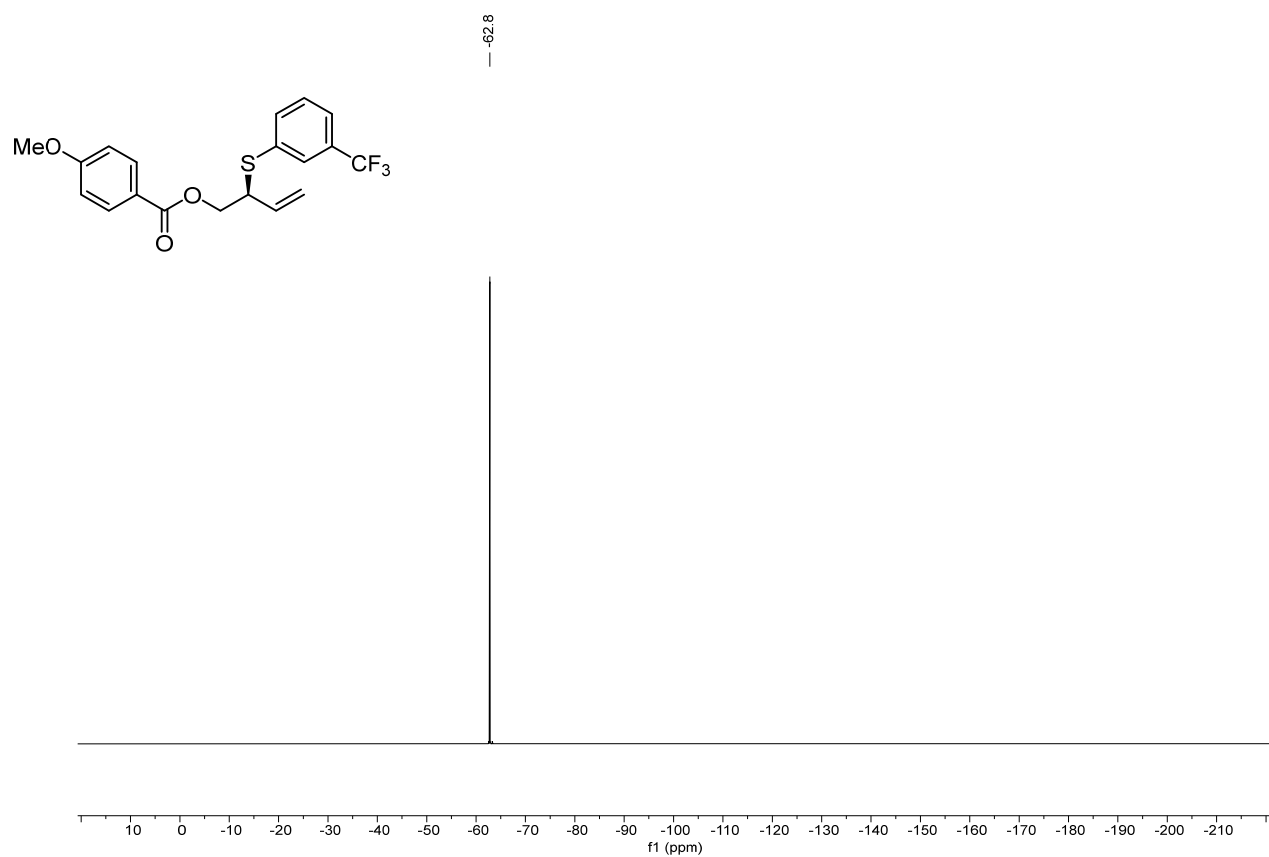

$^{19}\text{F}$  NMR (377 MHz,  $\text{CDCl}_3$ ) of **3w**

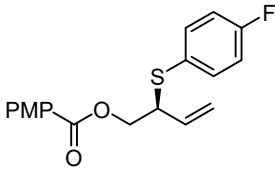

|                                                     |       |                                                     |       |                                                     |      |
|-----------------------------------------------------|-------|-----------------------------------------------------|-------|-----------------------------------------------------|------|
| $\begin{array}{c} \diagup \\ \diagdown \end{array}$ | 165.9 | $\begin{array}{c} \diagup \\ \diagdown \end{array}$ | 136.2 | $\begin{array}{c} \diagup \\ \diagdown \end{array}$ | 77.3 |
| $\begin{array}{c} \diagup \\ \diagdown \end{array}$ | 164.0 | $\begin{array}{c} \diagup \\ \diagdown \end{array}$ | 136.1 | $\begin{array}{c} \diagup \\ \diagdown \end{array}$ | 77.0 |
| $\begin{array}{c} \diagup \\ \diagdown \end{array}$ | 163.5 | $\begin{array}{c} \diagup \\ \diagdown \end{array}$ | 134.7 | $\begin{array}{c} \diagup \\ \diagdown \end{array}$ | 76.7 |
| $\begin{array}{c} \diagup \\ \diagdown \end{array}$ | 161.5 | $\begin{array}{c} \diagup \\ \diagdown \end{array}$ | 131.7 | $\begin{array}{c} \diagup \\ \diagdown \end{array}$ | —    |
| $\begin{array}{c} \diagup \\ \diagdown \end{array}$ | —     | $\begin{array}{c} \diagup \\ \diagdown \end{array}$ | 127.9 | $\begin{array}{c} \diagup \\ \diagdown \end{array}$ | —    |
| $\begin{array}{c} \diagup \\ \diagdown \end{array}$ | —     | $\begin{array}{c} \diagup \\ \diagdown \end{array}$ | 122.2 | $\begin{array}{c} \diagup \\ \diagdown \end{array}$ | —    |
| $\begin{array}{c} \diagup \\ \diagdown \end{array}$ | —     | $\begin{array}{c} \diagup \\ \diagdown \end{array}$ | 118.1 | $\begin{array}{c} \diagup \\ \diagdown \end{array}$ | —    |
| $\begin{array}{c} \diagup \\ \diagdown \end{array}$ | —     | $\begin{array}{c} \diagup \\ \diagdown \end{array}$ | 116.1 | $\begin{array}{c} \diagup \\ \diagdown \end{array}$ | —    |
| $\begin{array}{c} \diagup \\ \diagdown \end{array}$ | —     | $\begin{array}{c} \diagup \\ \diagdown \end{array}$ | 115.9 | $\begin{array}{c} \diagup \\ \diagdown \end{array}$ | —    |
| $\begin{array}{c} \diagup \\ \diagdown \end{array}$ | —     | $\begin{array}{c} \diagup \\ \diagdown \end{array}$ | 113.6 | $\begin{array}{c} \diagup \\ \diagdown \end{array}$ | —    |

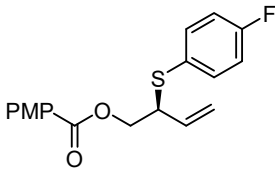

S71

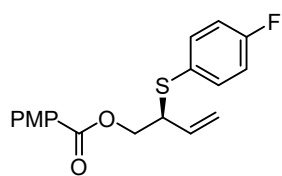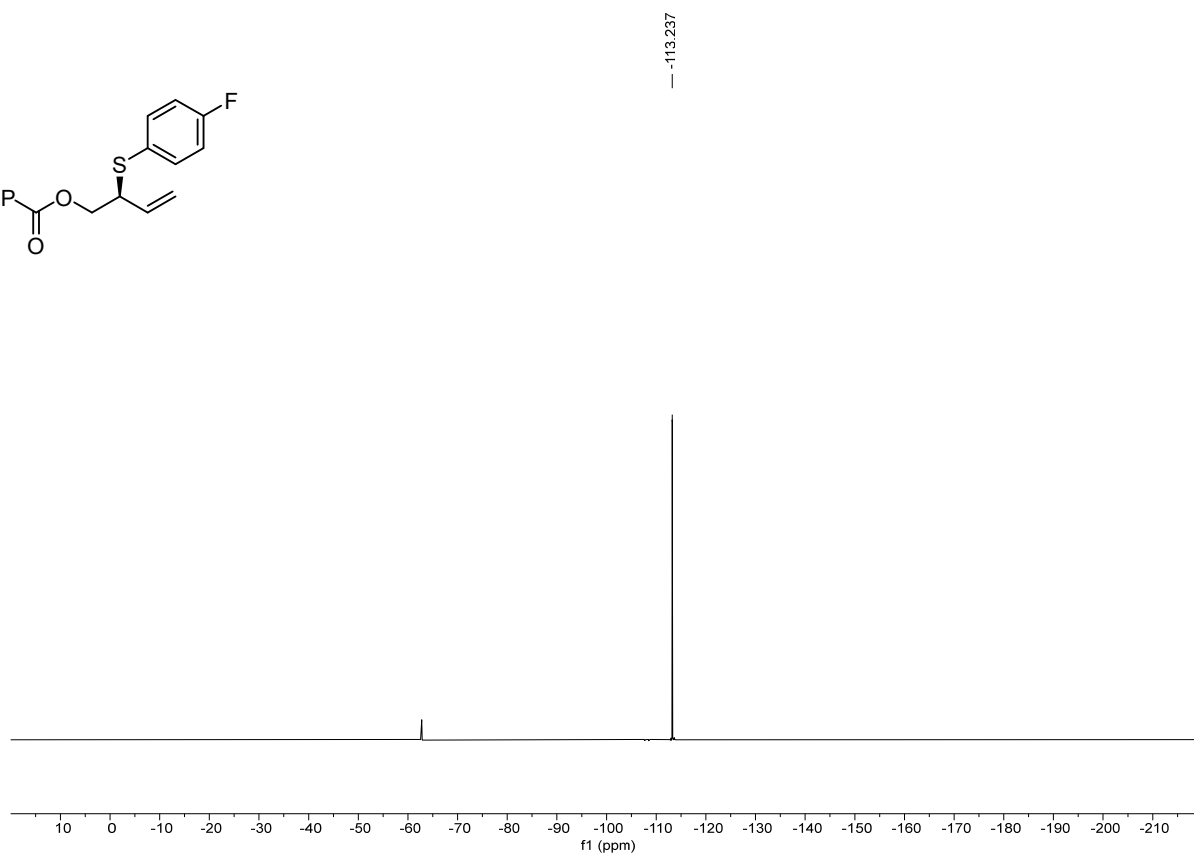

**<sup>19</sup>F NMR (377 MHz, CDCl<sub>3</sub>) of 3x**

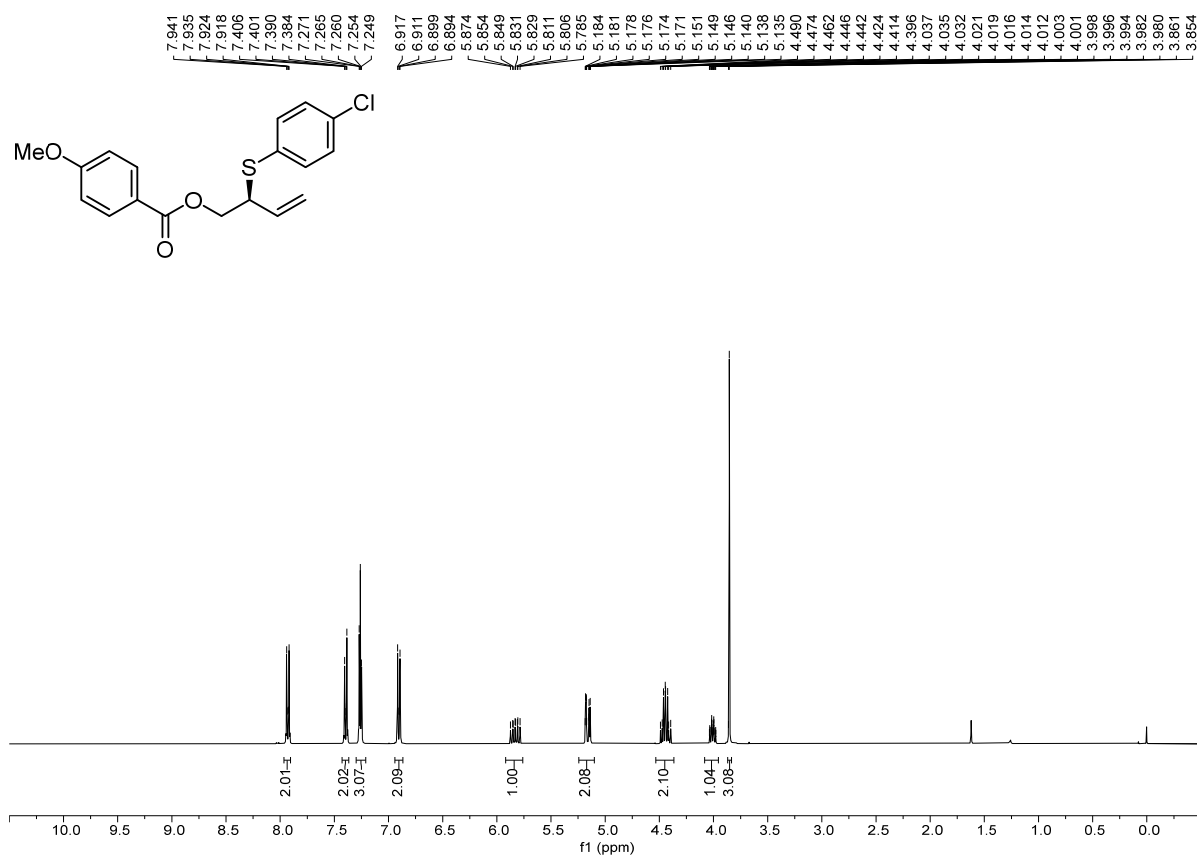

$^1\text{H}$  NMR (400 MHz,  $\text{CDCl}_3$ ) of **3y**

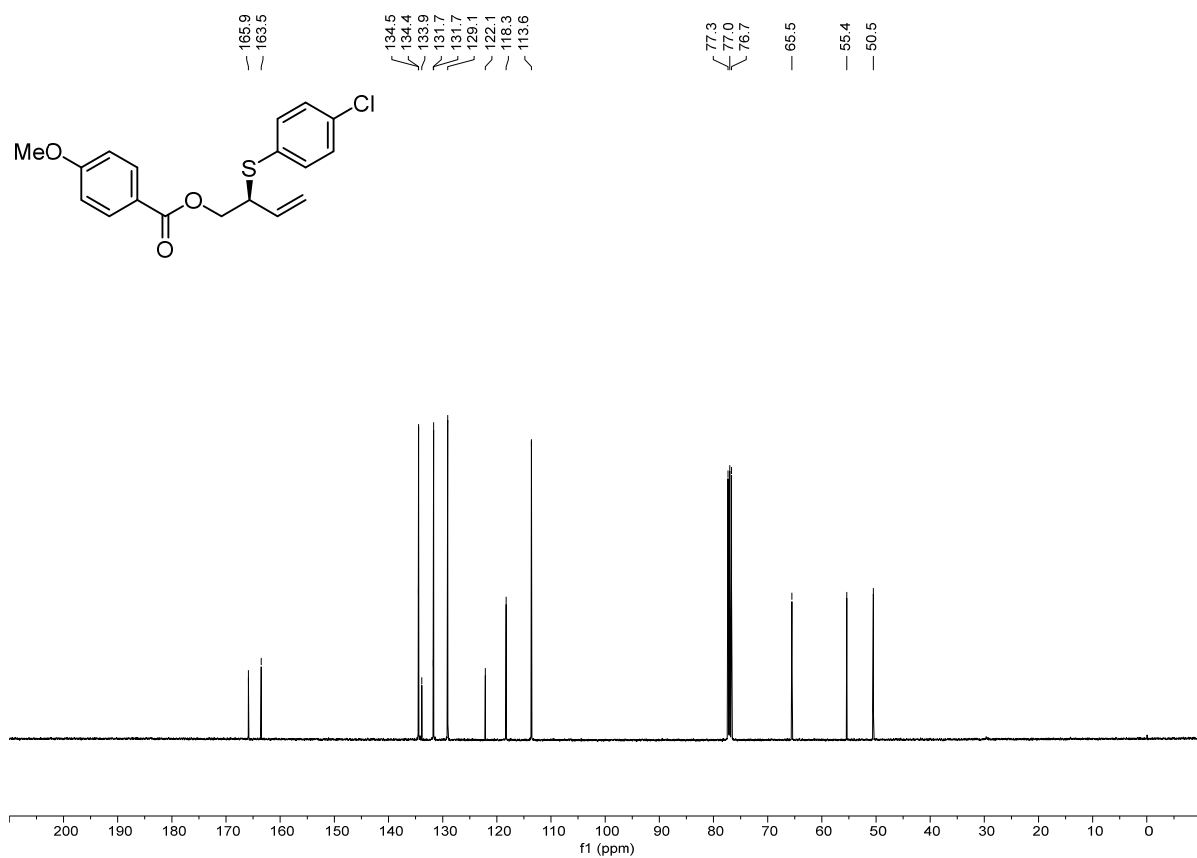

$^{13}\text{C}$  NMR (101 MHz,  $\text{CDCl}_3$ ) of **3y**

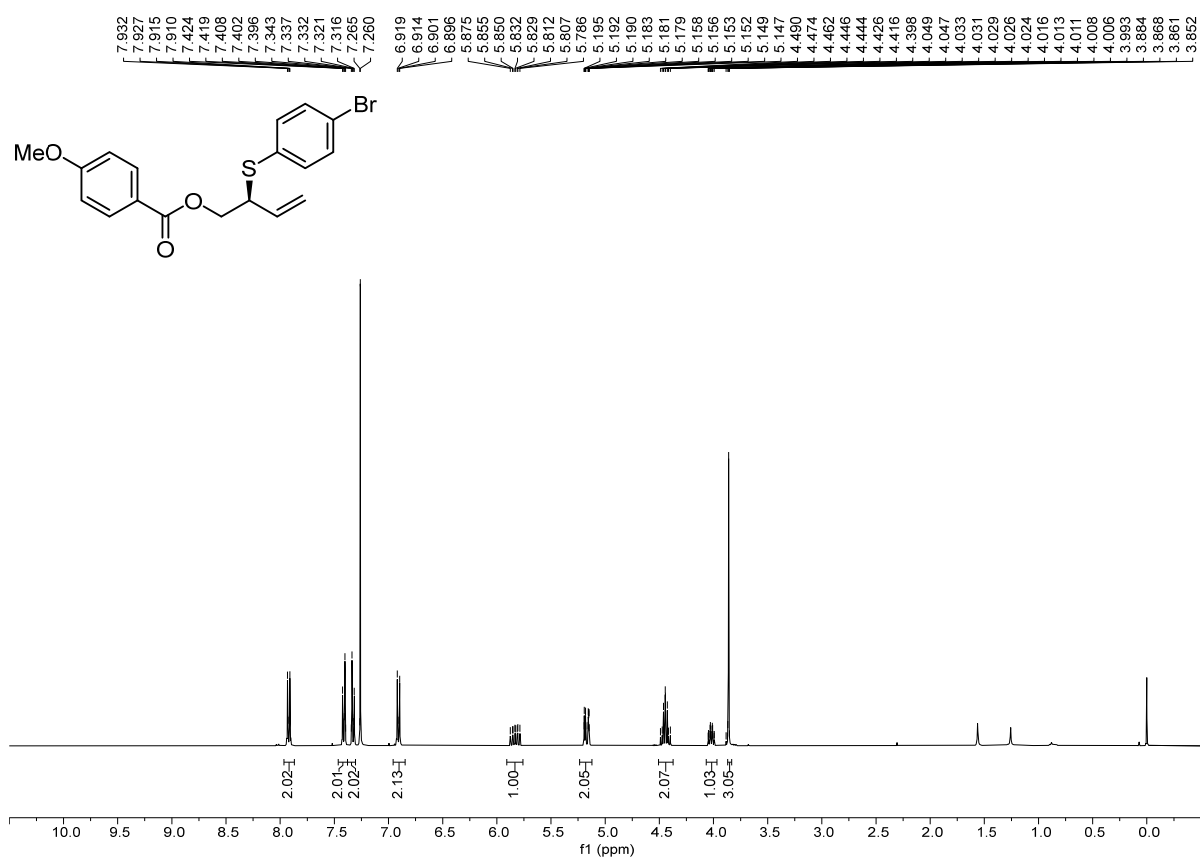

<sup>1</sup>H NMR (400 MHz, CDCl<sub>3</sub>) of **3z**

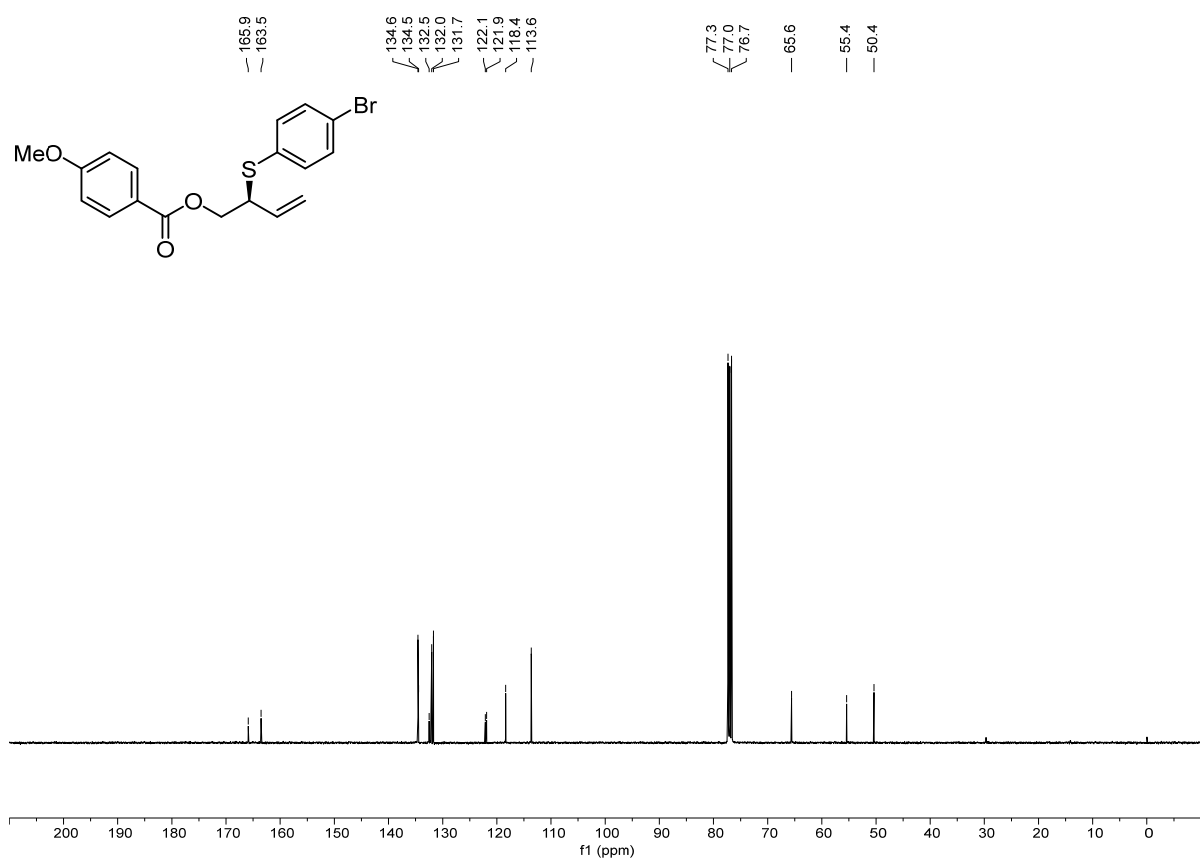

<sup>13</sup>C NMR (101 MHz, CDCl<sub>3</sub>) of **3z**

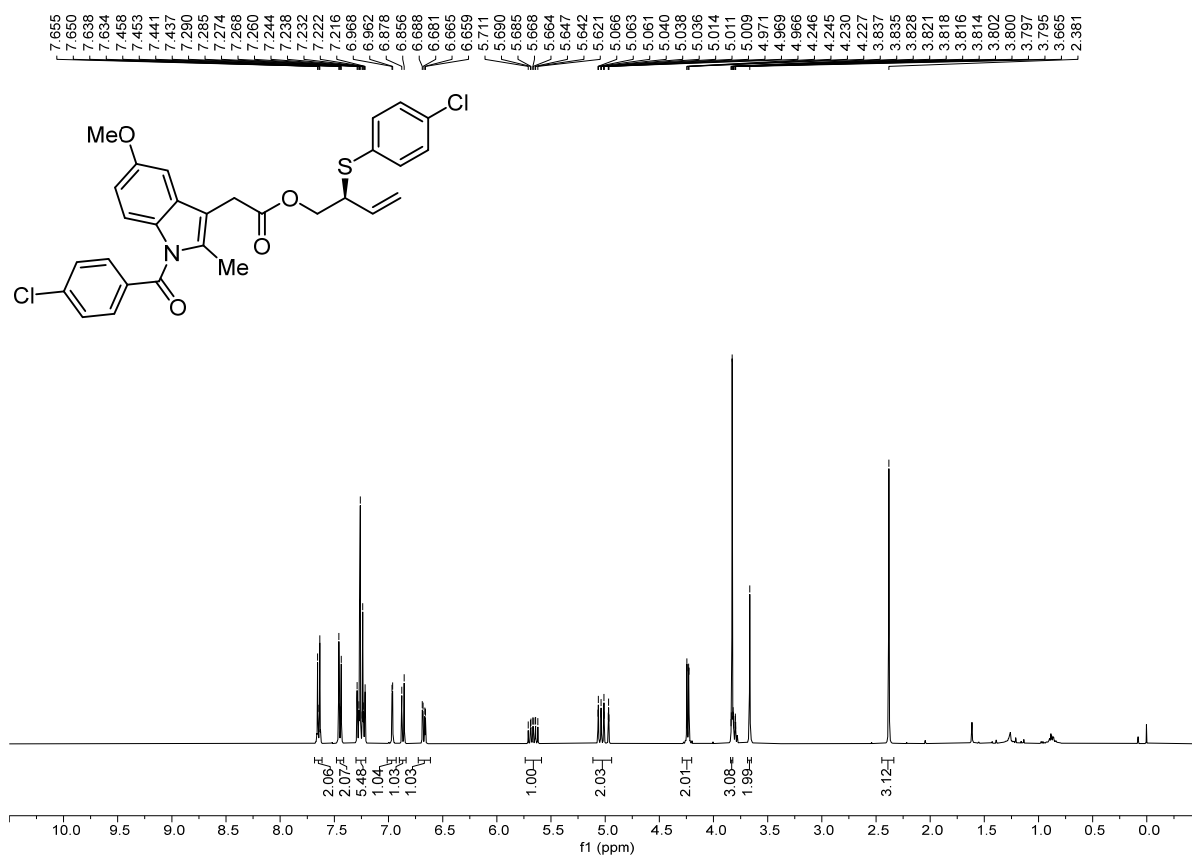

**<sup>1</sup>H NMR (400 MHz, CDCl<sub>3</sub>) of 3A**

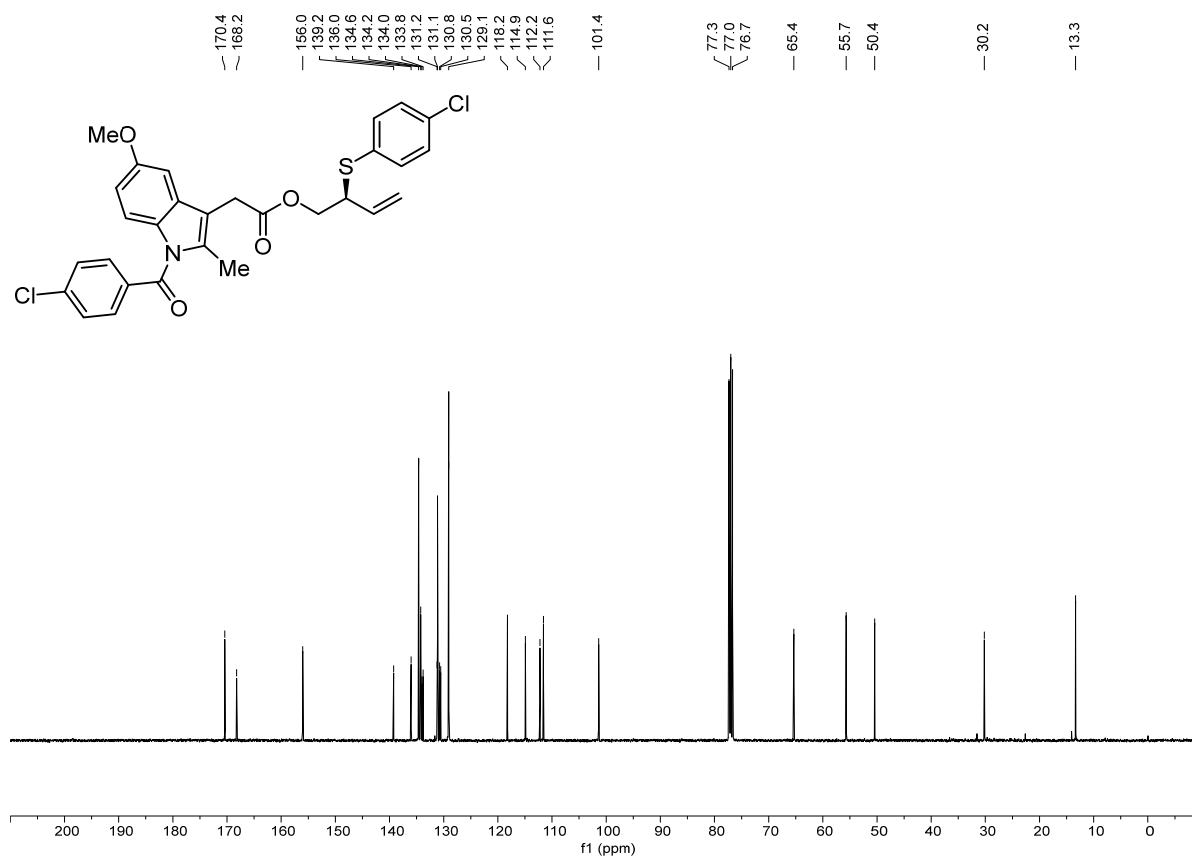

**<sup>13</sup>C NMR (101 MHz, CDCl<sub>3</sub>) of 3A**

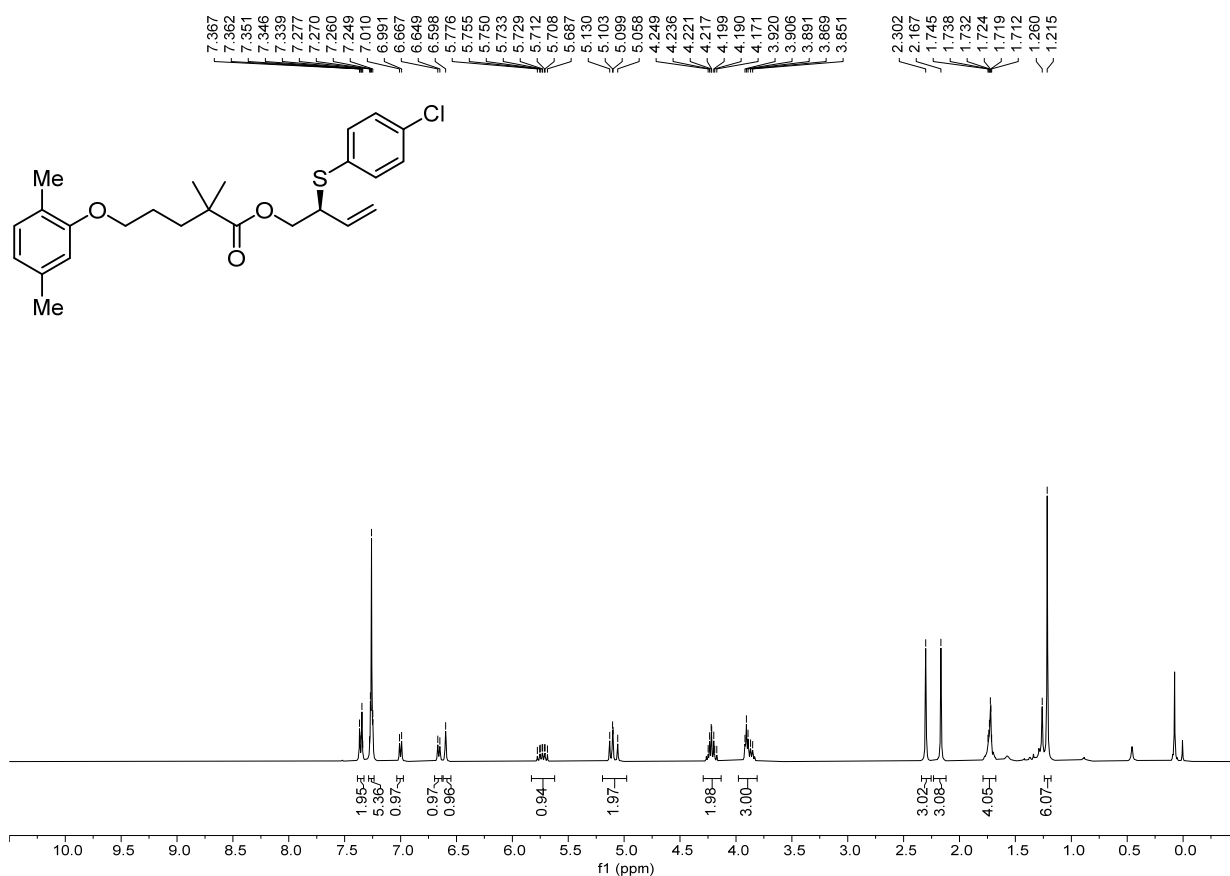

$^1\text{H}$  NMR (400 MHz,  $\text{CDCl}_3$ ) of **3B**

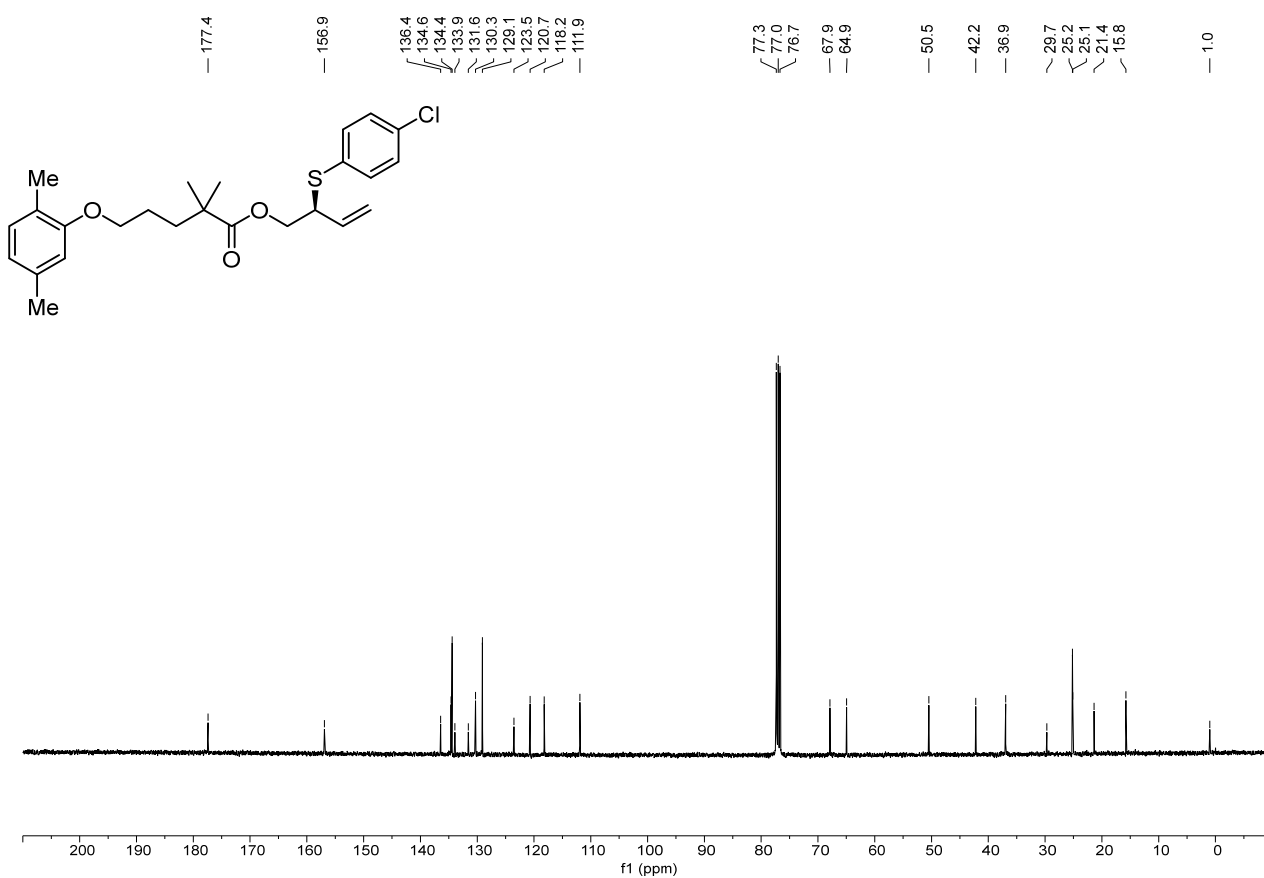

$^{13}\text{C}$  NMR (101 MHz,  $\text{CDCl}_3$ ) of **3B**



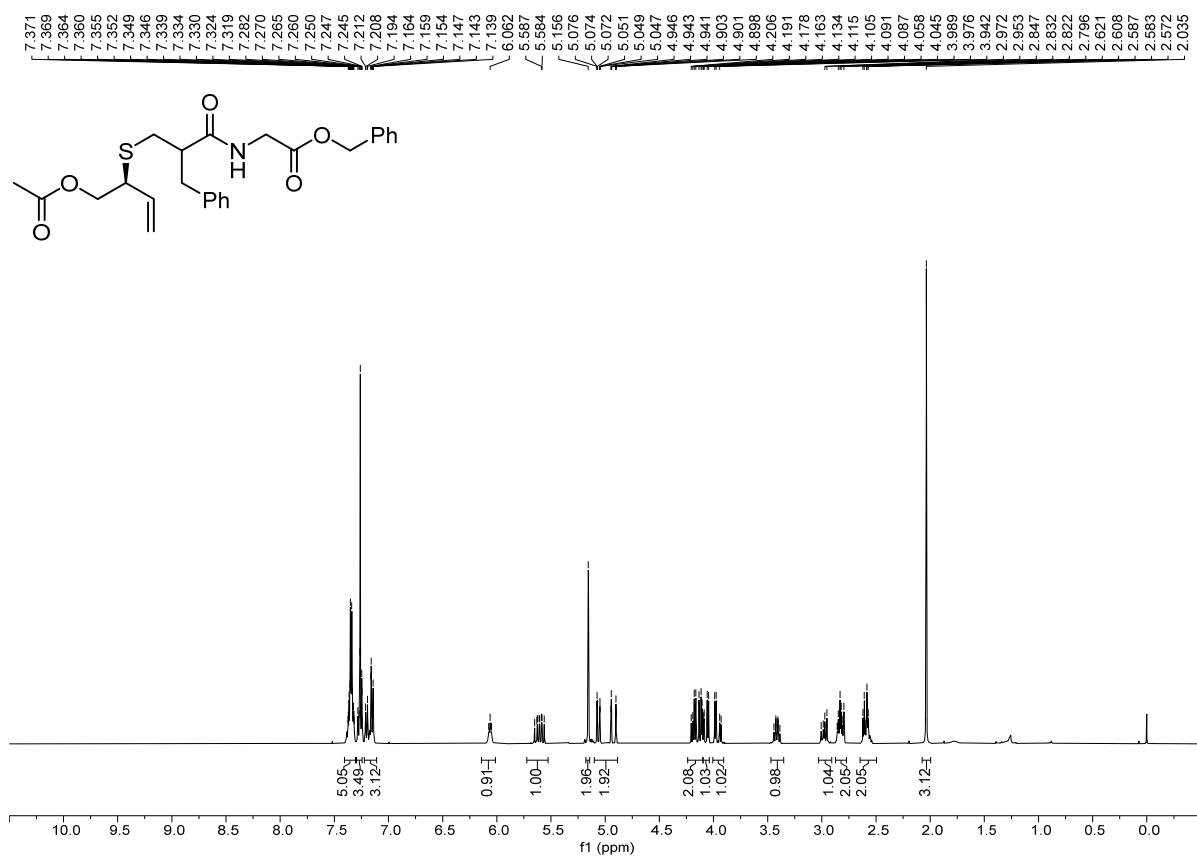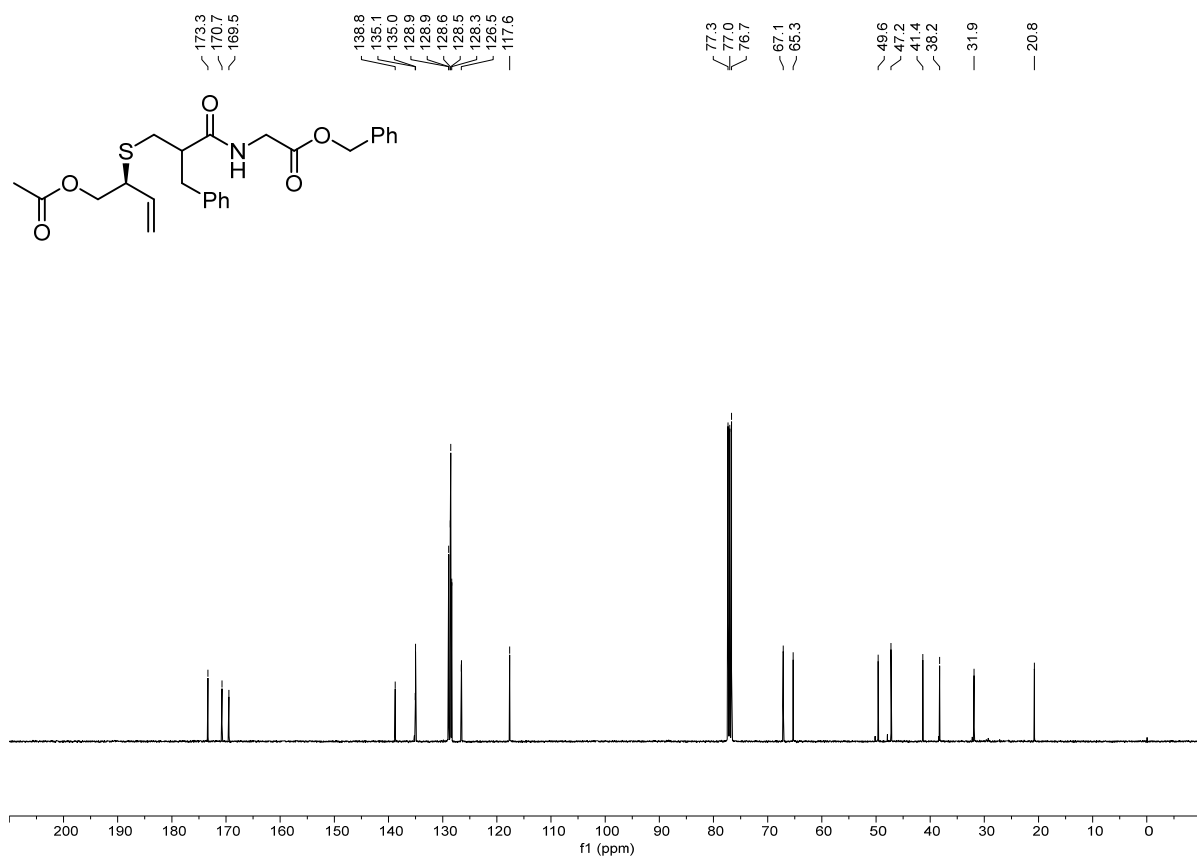

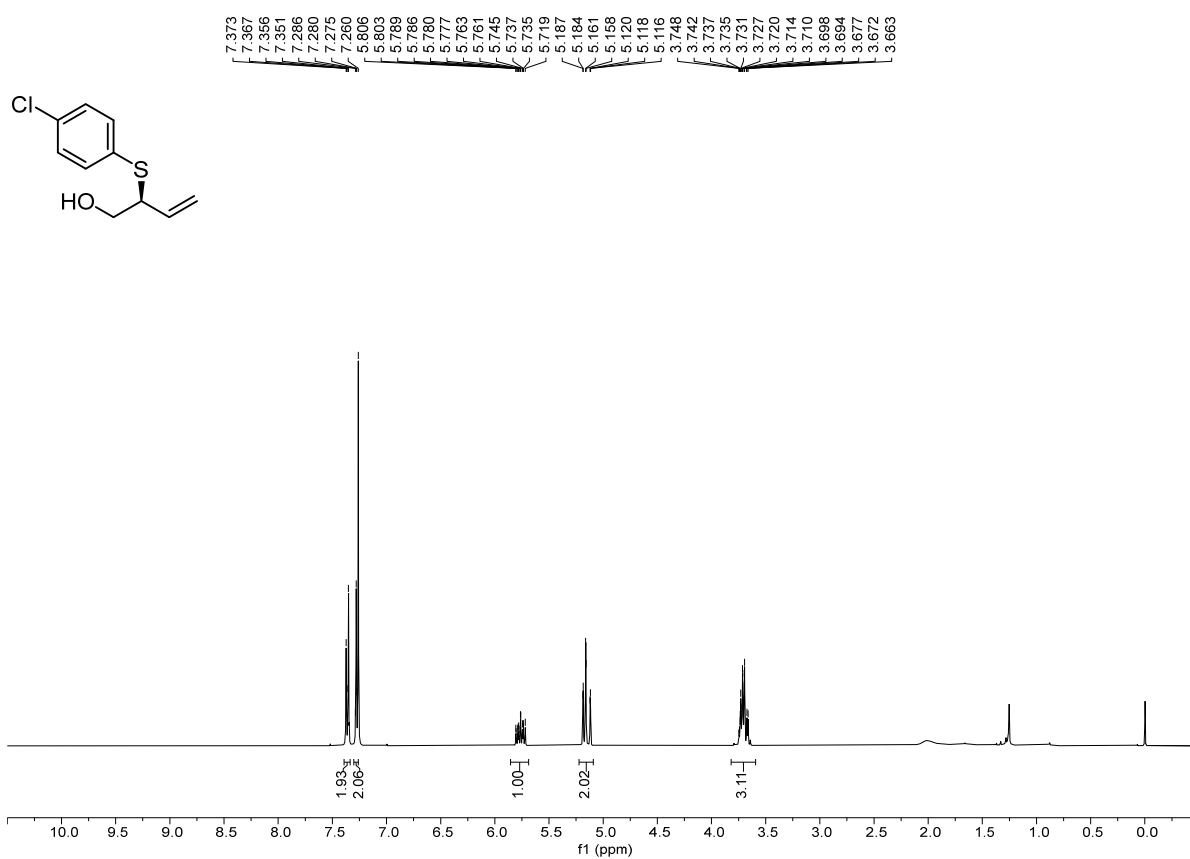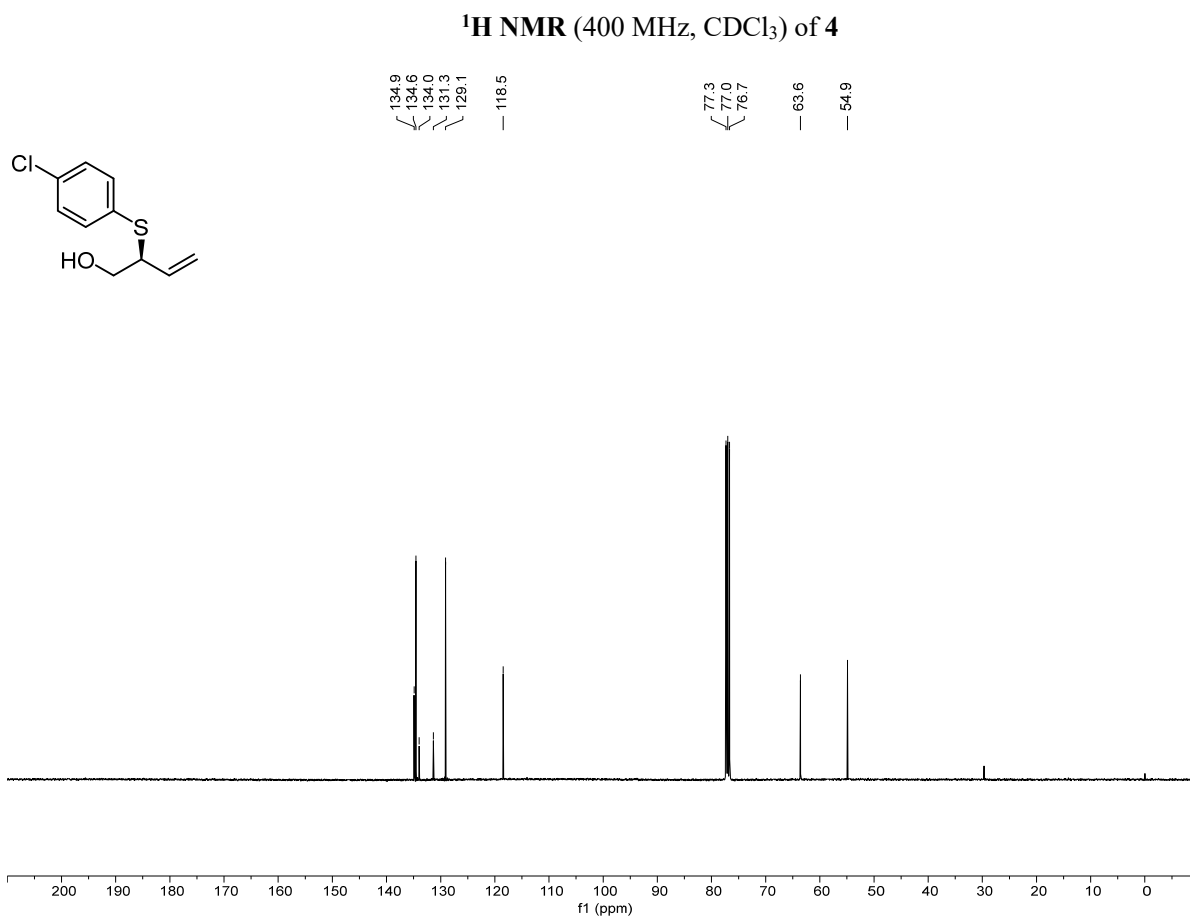

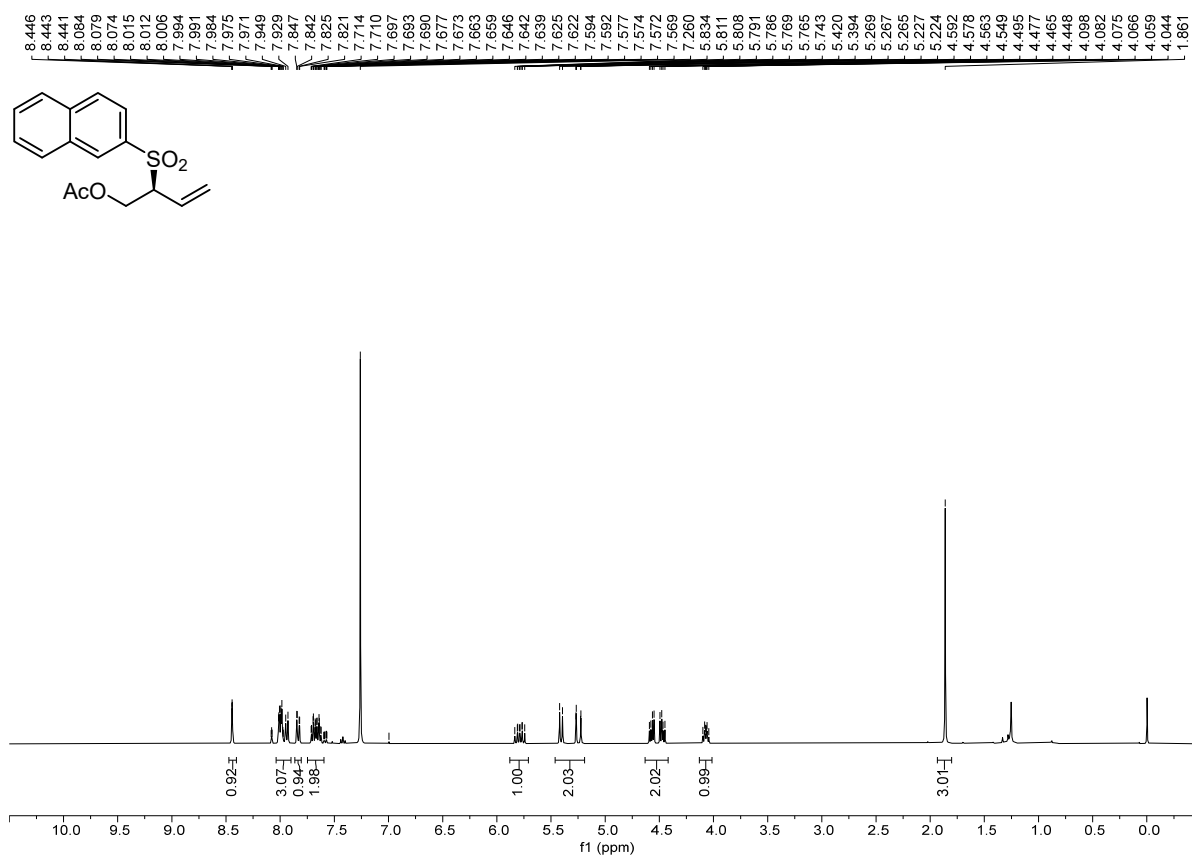

<sup>1</sup>H NMR (400 MHz, CDCl<sub>3</sub>) of **5**

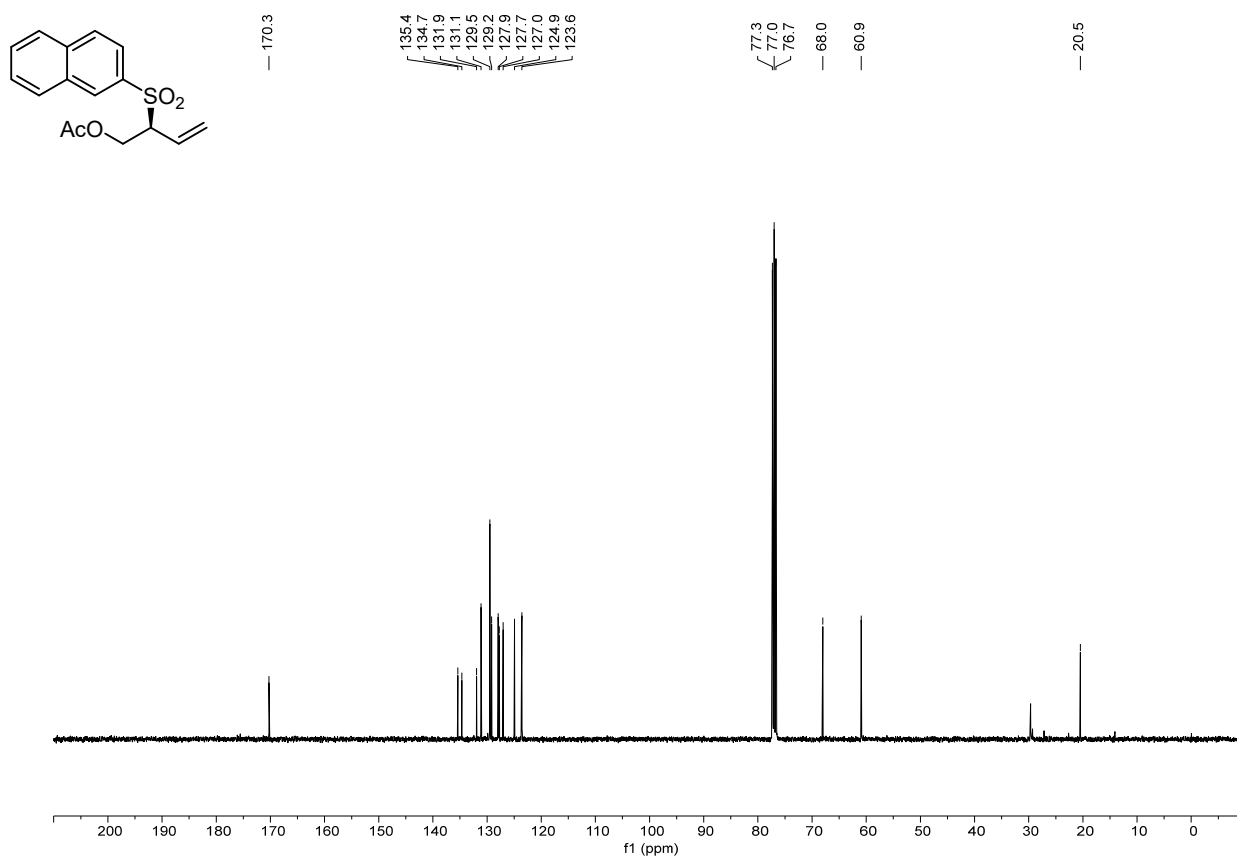

<sup>13</sup>C NMR (101 MHz, CDCl<sub>3</sub>) of **5**

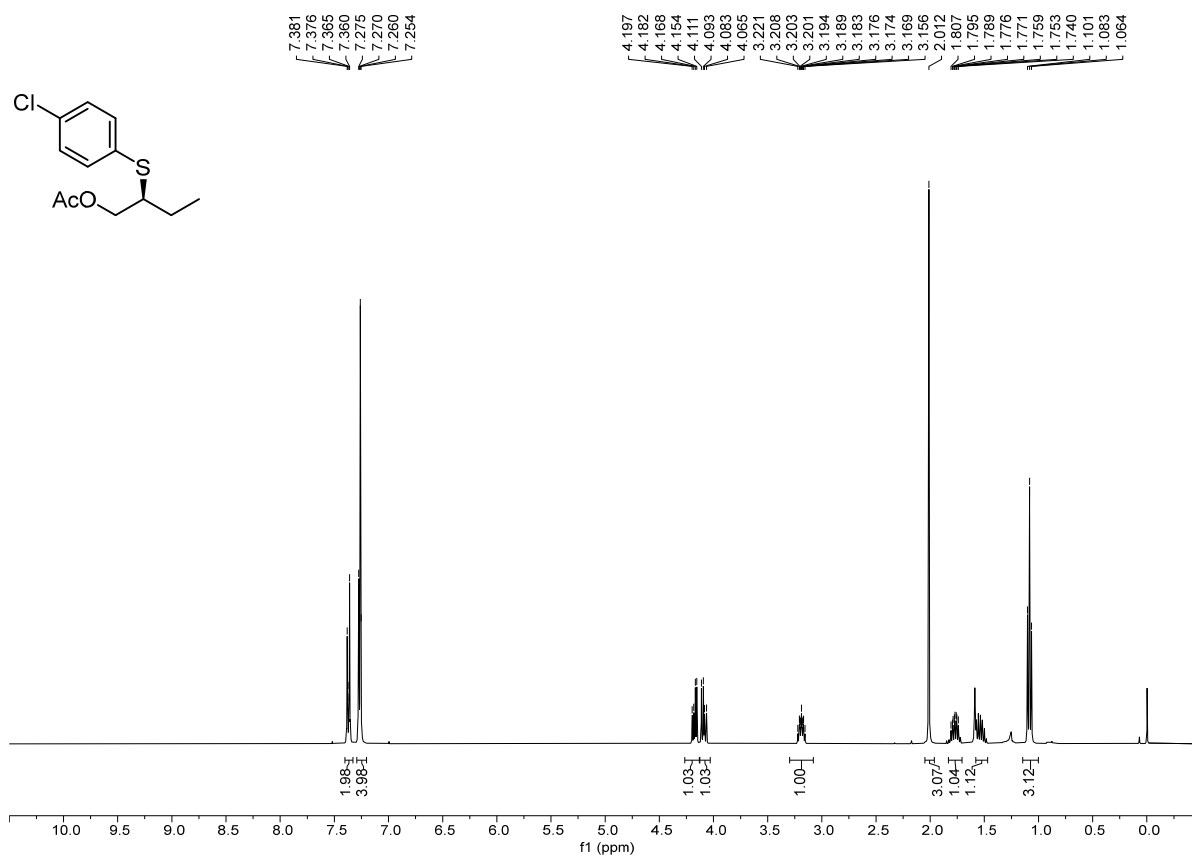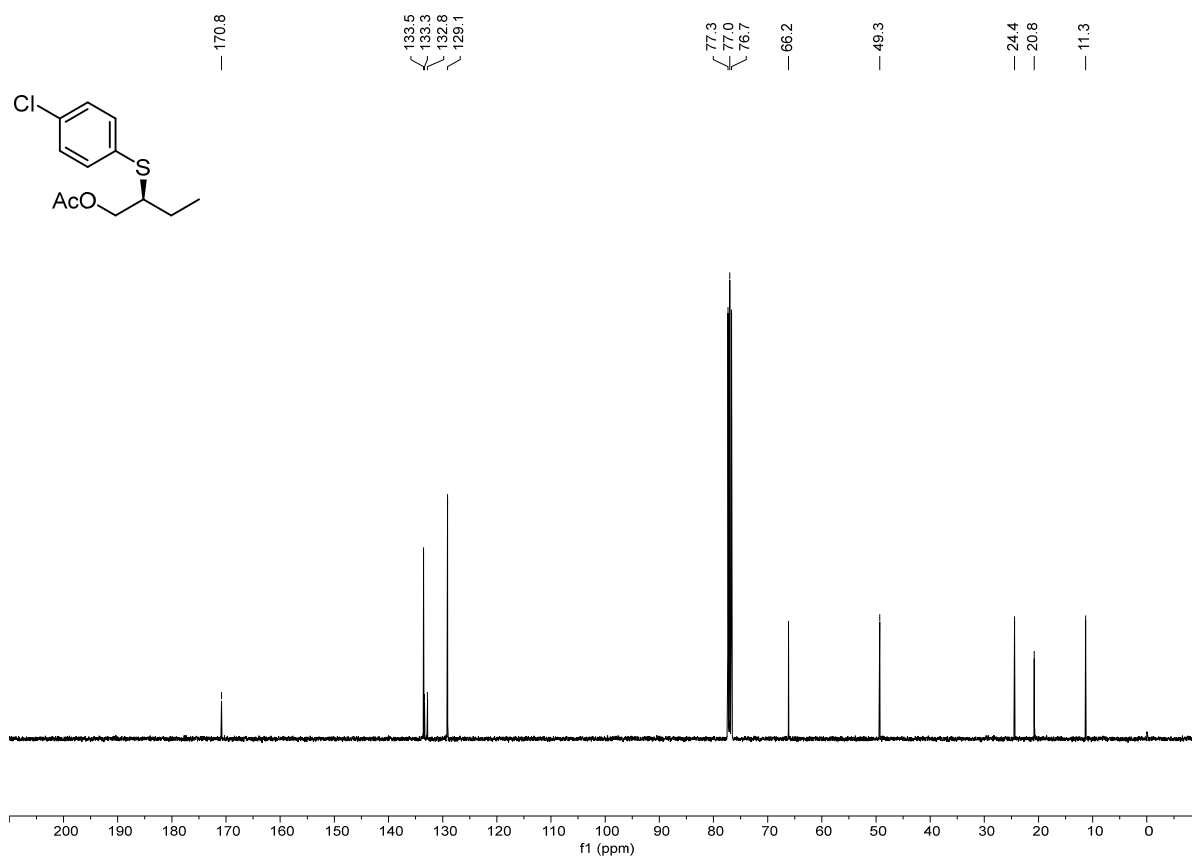

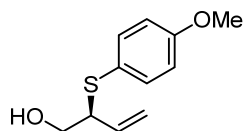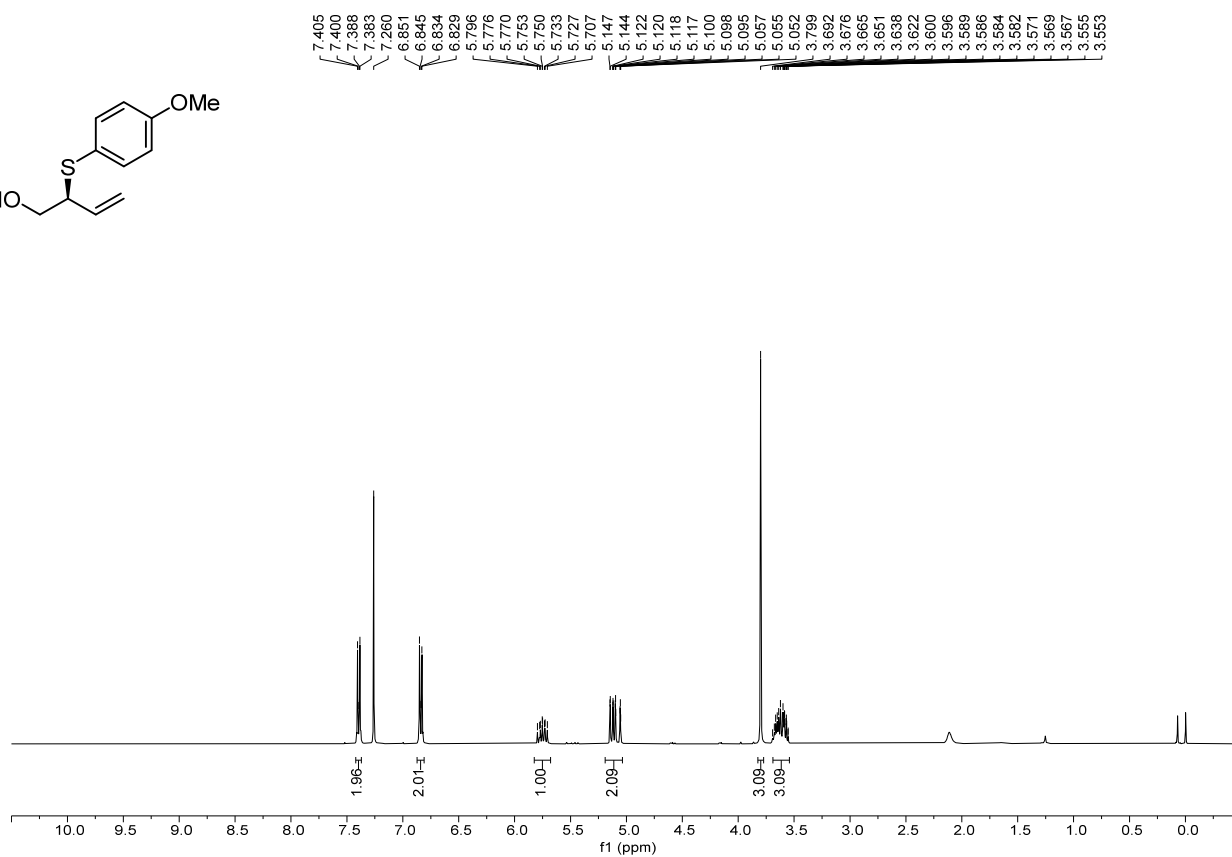

**$^1\text{H}$  NMR (400 MHz,  $\text{CDCl}_3$ ) of **8****

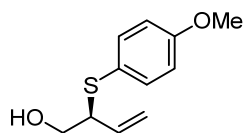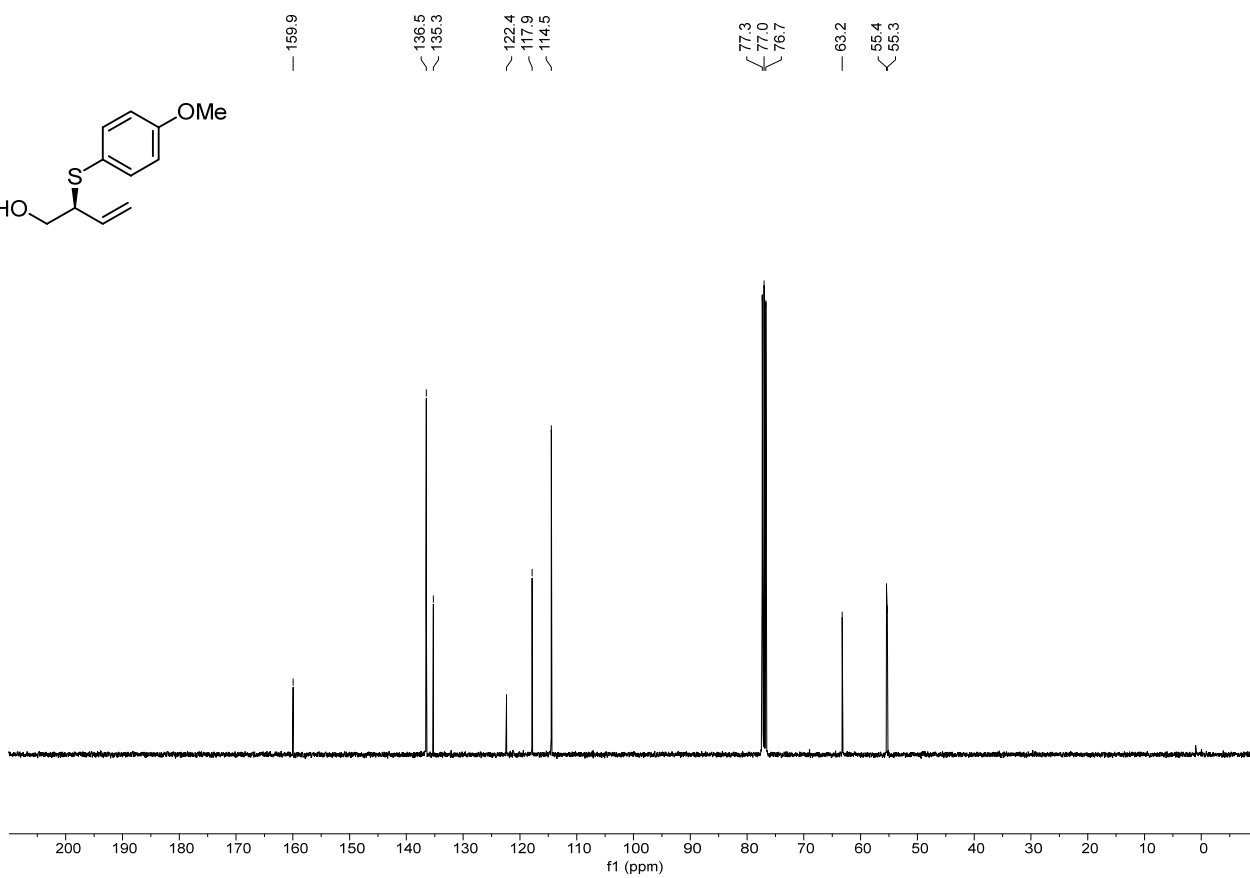

**$^{13}\text{C}$  NMR (101 MHz,  $\text{CDCl}_3$ ) of **8****

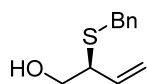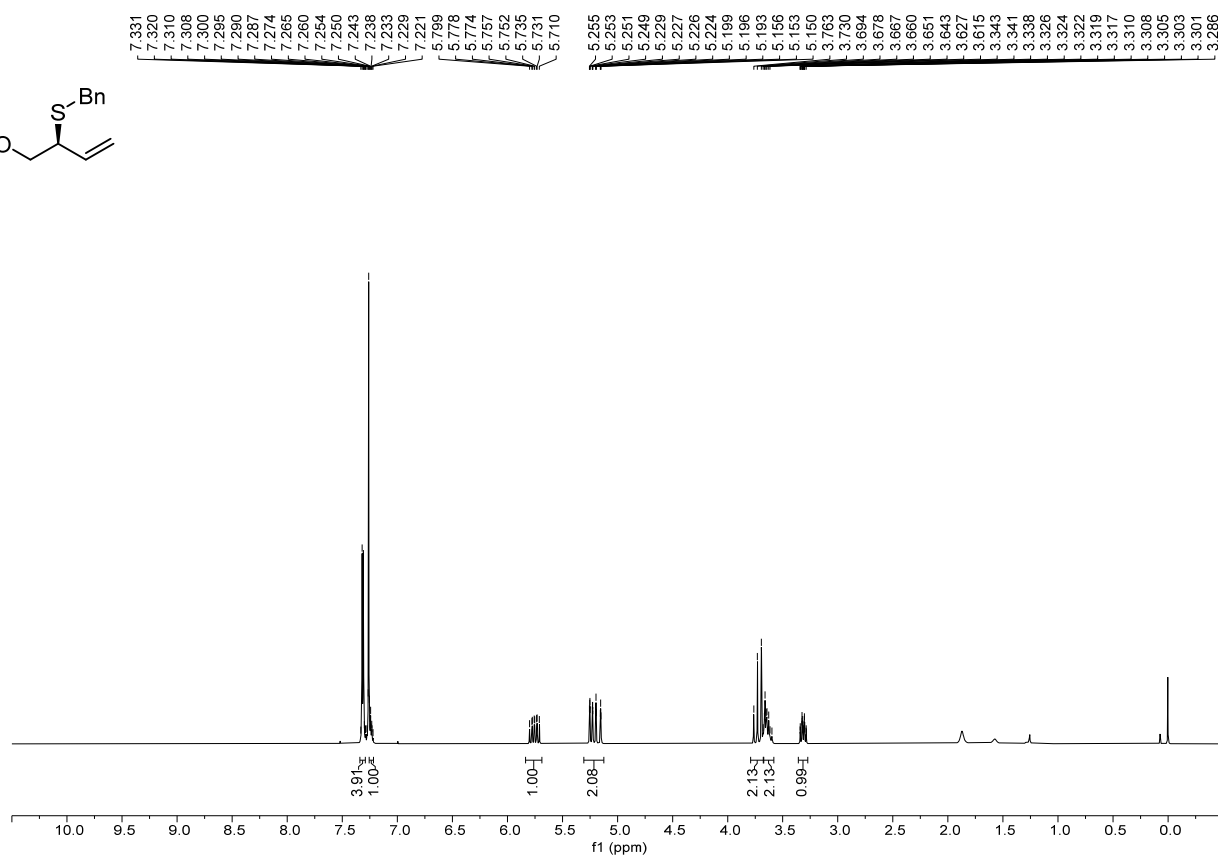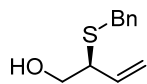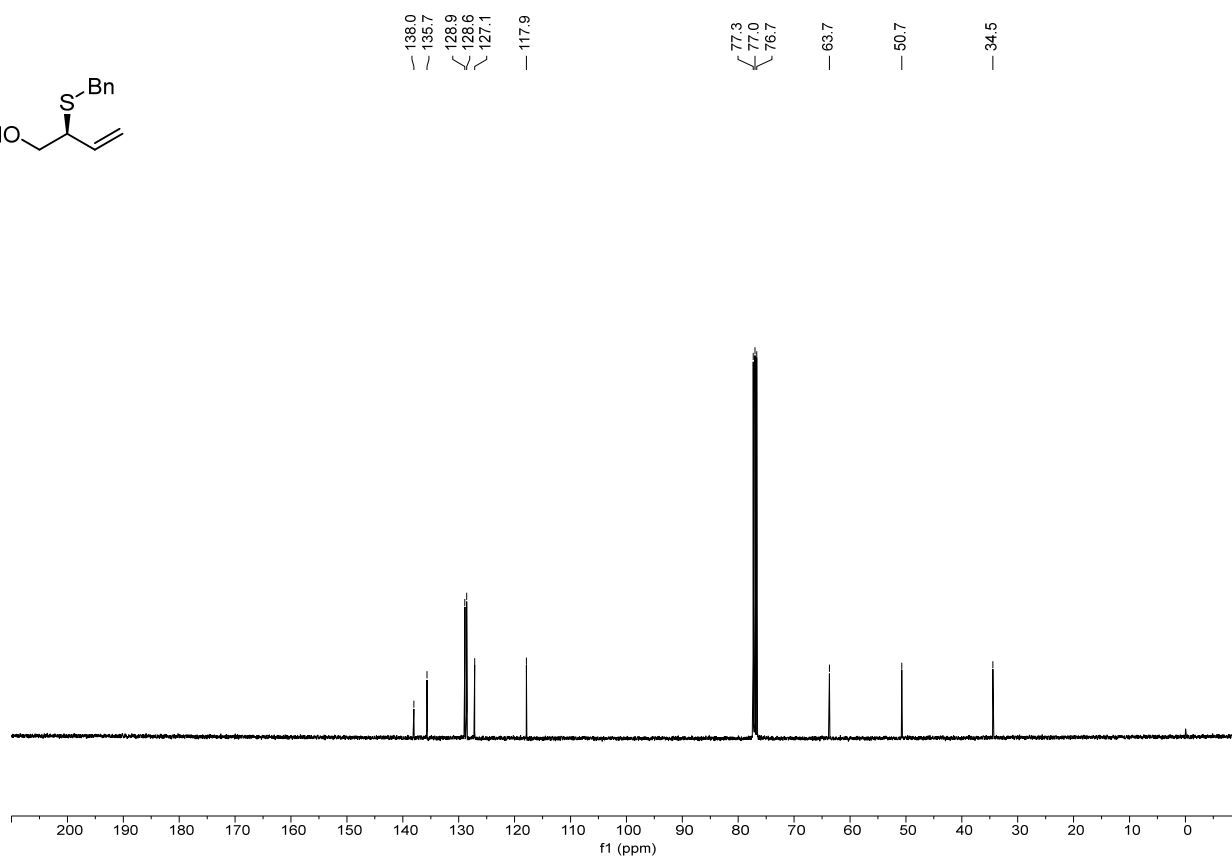

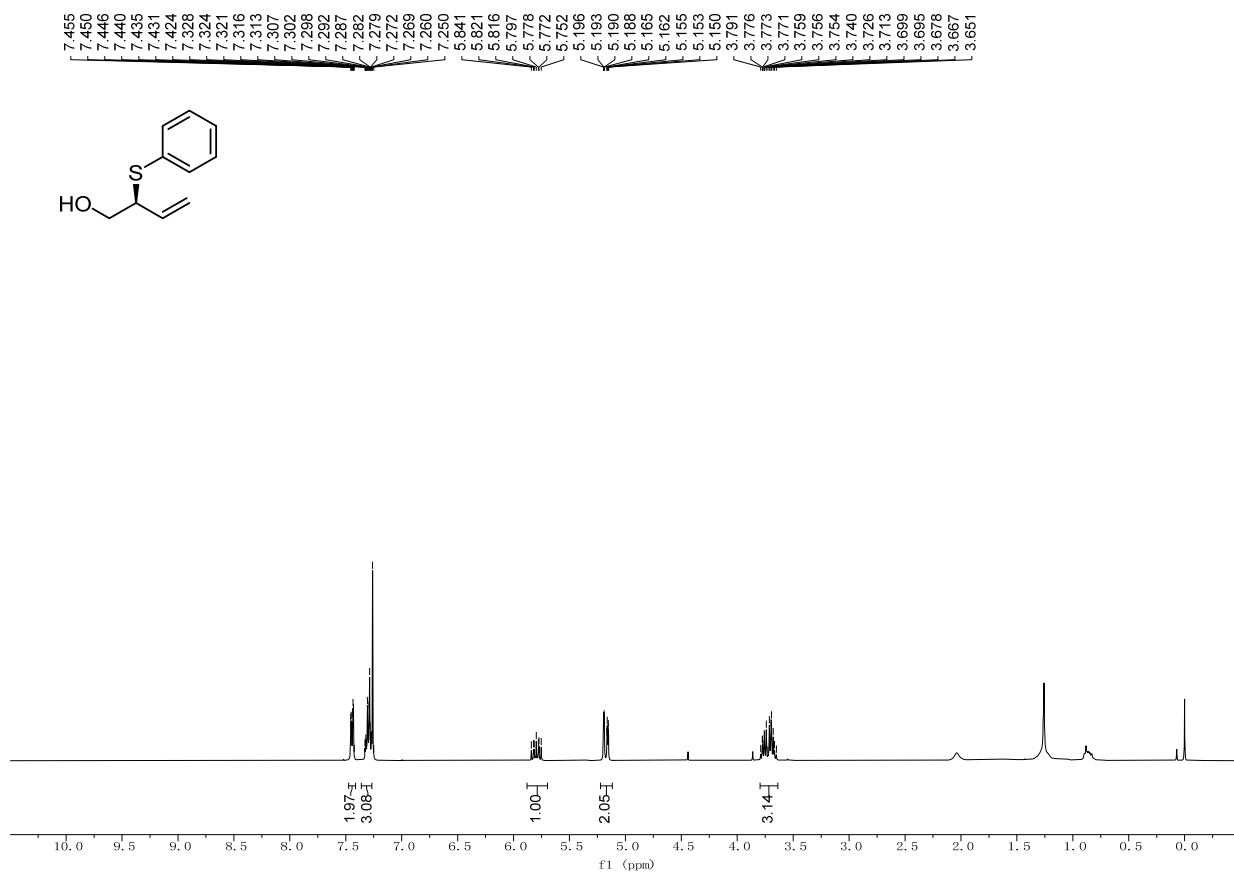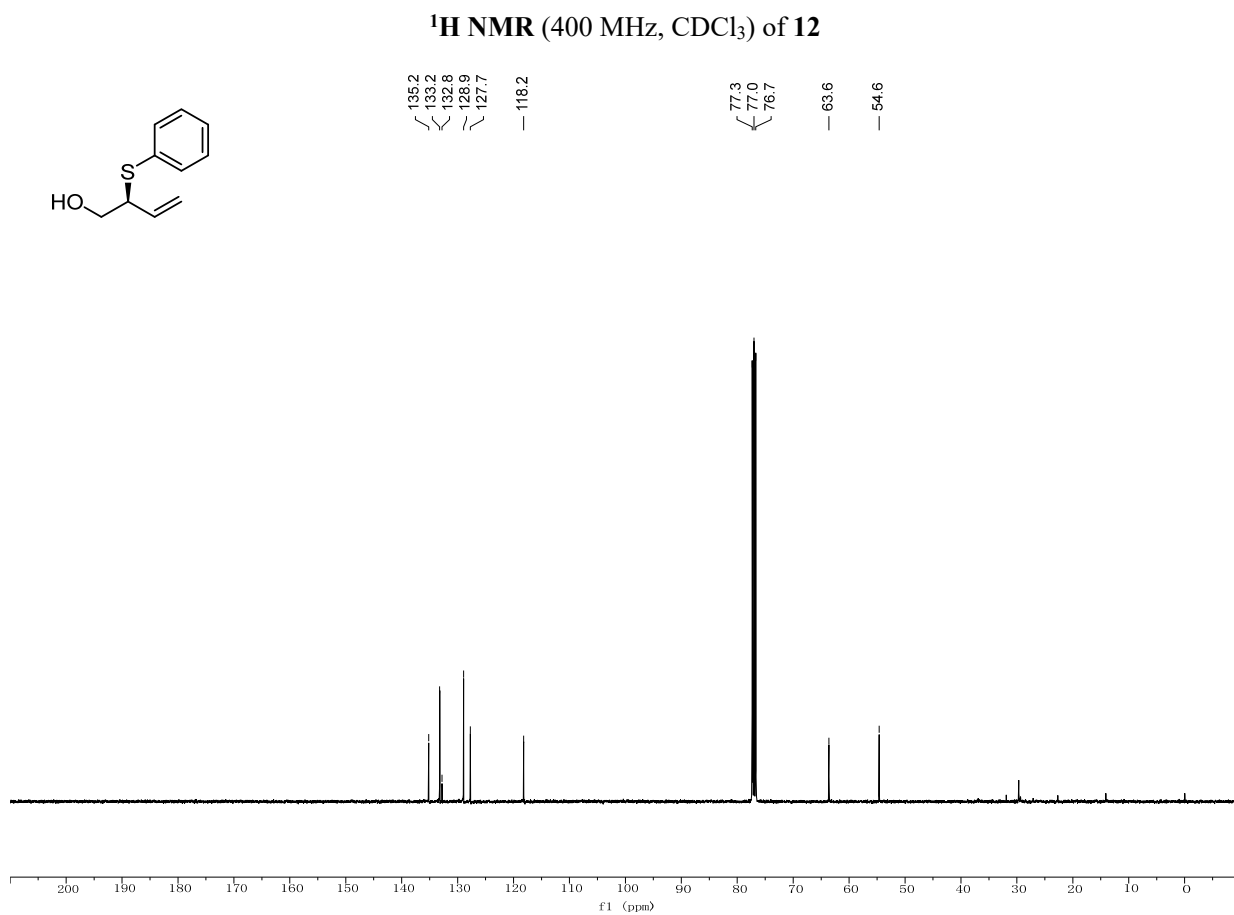

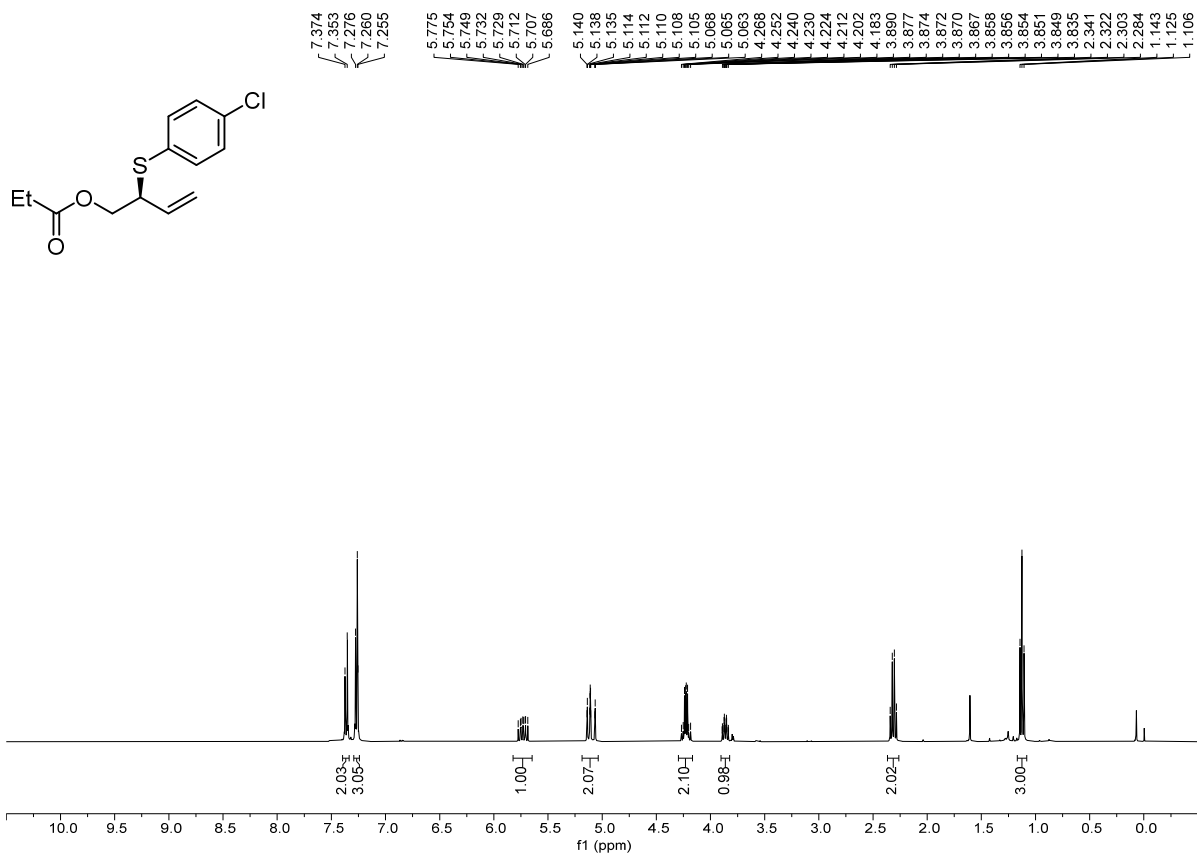

**<sup>1</sup>H NMR (400 MHz, CDCl<sub>3</sub>) of **3ra****

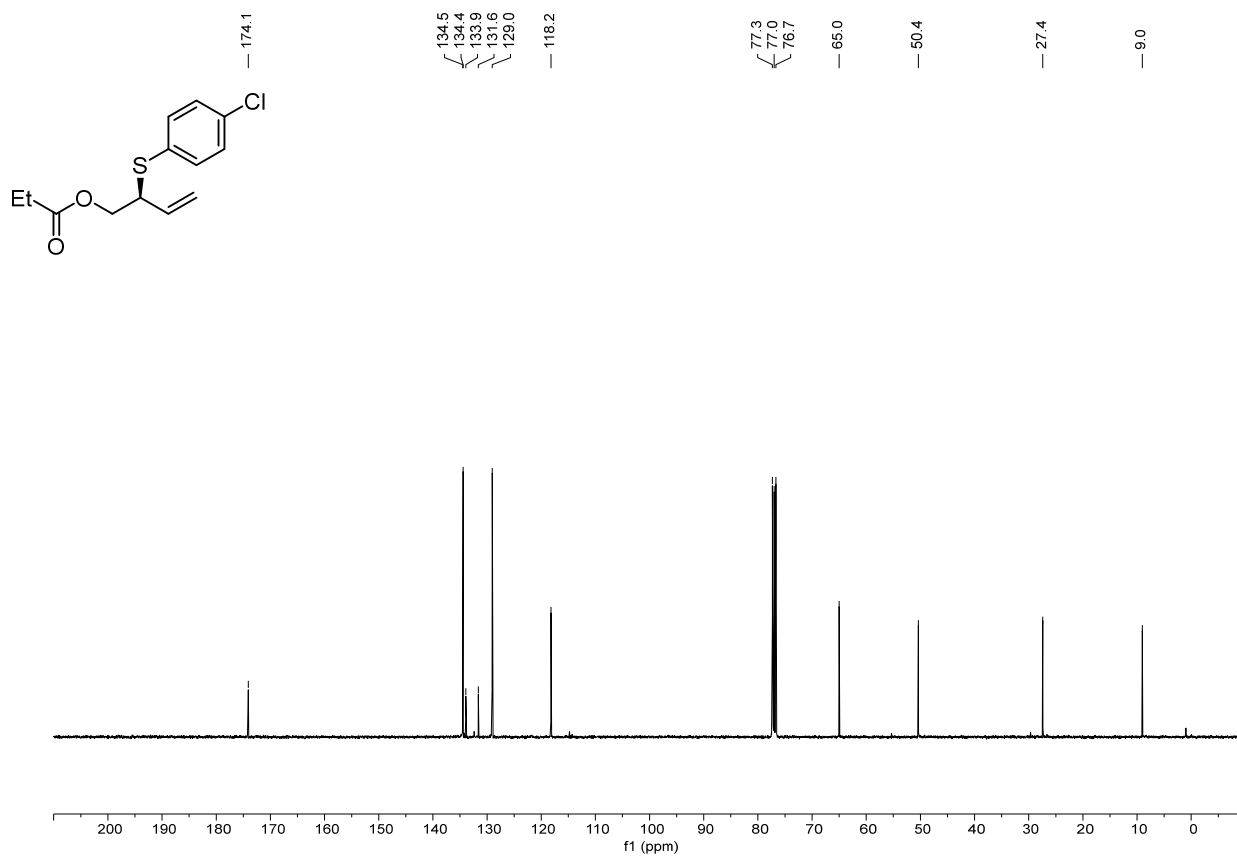

**<sup>13</sup>C NMR (101 MHz, CDCl<sub>3</sub>) of **3ra****
